# Supplementary material for: Genome mining reveals a new cyclopentane-forming sesterterpene synthase with unprecedented stereo-control
Source: Royal Society of Chemistry journal article supplement (doi:10.1039/d2qo00983h), 2022-01-01

# Genome Mining Reveals a New Cyclopentane-forming Sesterterpene Synthase with Unprecedented Stereo-control

Yuben Qiao,<sup>a,1</sup> Qiaoxin Xu,<sup>a,1</sup> Zijian Huang,<sup>a</sup> Xia Chen,<sup>b</sup> Xiaomeng Ren,<sup>a</sup>  
Wenling Yuan,<sup>a</sup> Zhenhua Guan,<sup>a</sup> Pengkun Li,<sup>a</sup> Fengli Li,<sup>a</sup> Chaomei  
Xiong,<sup>a</sup> Hucheng Zhu,<sup>a</sup> Chunmei Chen,<sup>a</sup> Lianghu Gu,<sup>a</sup> Yuan Zhou,<sup>a</sup>  
Changxing Qi,<sup>a</sup> Zhengxi Hu,<sup>a</sup> Junjun Liu,<sup>\*,a</sup> Ying Ye,<sup>\*,a</sup> and Yonghui  
Zhang<sup>\*,a</sup>

<sup>a</sup>*Hubei Key Laboratory of Natural Medicinal Chemistry and Resource Evaluation, School of Pharmacy, Tongji Medical College, Huazhong University of Science and Technology, Wuhan 430030, People's Republic of China*

<sup>b</sup>*National & Local Joint Engineering Research Center of High-throughput Drug Screening Technology, Hubei Key Laboratory of Biotechnology of Chinese Traditional Medicine, School of Life Sciences, Hubei University, Wuhan, 430062, China*

<sup>1</sup>*These authors contributed equally*

## \*Corresponding Authors:

E-mails: [zhangyh@mails.tjmu.edu.cn](mailto:zhangyh@mails.tjmu.edu.cn) (Y. Zhang); [ying\\_ye@hust.edu.cn](mailto:ying_ye@hust.edu.cn) (Y. Ye); and  
[junjun.liu@hust.edu.cn](mailto:junjun.liu@hust.edu.cn) (J. Liu)

## Contents of Supporting Information

|                                                                                                                                                                                                                                                            |    |
|------------------------------------------------------------------------------------------------------------------------------------------------------------------------------------------------------------------------------------------------------------|----|
| Figure S1. Phylogenetic tree of TC domains of BFTSs. (A) 115 (putative) BFTSs found in public database. (B) 15 representative BFTSs belongs to different clades. ....                                                                                      | 4  |
| Figure S2. Representative sesterterpenoids with 5/15 <i>trans</i> -fused bicyclic ring system. ....                                                                                                                                                        | 4  |
| Figure S3. GC-MS analysis for the extract of metabolites of AO-PstA. ....                                                                                                                                                                                  | 5  |
| Figure S4. Chemdraw 3D models at C12/13 double bond of <b>1</b> . ....                                                                                                                                                                                     | 5  |
| Figure S5. Two most possible C-18 isomers of <b>1</b> . ....                                                                                                                                                                                               | 6  |
| Figure S6. <sup>13</sup> C NMR calculation results of two possible isomers of <b>1</b> . ....                                                                                                                                                              | 6  |
| Figure S7. Chemical transformation of <b>1</b> . ....                                                                                                                                                                                                      | 7  |
| Figure S8. The key NOESY correlations of <b>4</b> . ....                                                                                                                                                                                                   | 7  |
| Figure S9. The absolute configuration of <b>1</b> and its enantiomer ( <i>ent</i> - <b>1</b> ). ....                                                                                                                                                       | 8  |
| Figure S10. <sup>1</sup> H NMR spectrum (dark color) of Penisentene ( <b>1</b> ) produced by <i>E. coli</i> BL21 (compare to stand, light colour). ....                                                                                                    | 9  |
| Figure S11. <sup>13</sup> C NMR spectrum of <b>1</b> prepared by feeding experiment with [1- <sup>13</sup> C, <sup>2</sup> H <sub>3</sub> ]acetate (compare to stand, light colour; and the shifted signals marked on the top of peaks). ....              | 10 |
| Scheme S1. Two possible pathways. ....                                                                                                                                                                                                                     | 11 |
| Figure S12. Deprotonation pathways from <b>IM3</b> to product penisentene in the gas phase. Relative free energies (kcal/mol) are labeled with red numbers in parentheses. Structures are optimized at the M06-2X/6-31 G(d,p) level in the gas phase. .... | 11 |
| Figure S13. Cell free assay of <i>E. coli-pstA</i> . ....                                                                                                                                                                                                  | 12 |
| Figure S14. GC-MS analysis for the extract of metabolites of AO-PstAB. ....                                                                                                                                                                                | 12 |
| Figure S15. IR spectrum of <b>2</b> . ....                                                                                                                                                                                                                 | 13 |
| Figure S16. HRESIMS spectrum of Penisentone ( <b>3</b> ). ....                                                                                                                                                                                             | 13 |
| Figure S17. IR spectrum of <b>3</b> . ....                                                                                                                                                                                                                 | 14 |
| Figure S18. Possible oxidative transformations of <b>3</b> and chaetoglobosins. ....                                                                                                                                                                       | 15 |
| Table S1. <sup>1</sup> H NMR (400 MHz) and <sup>13</sup> C NMR (100 MHz) data for compound <b>1-3</b> in CDCl <sub>3</sub> ( $\delta$ in ppm and <i>J</i> in Hz). ....                                                                                     | 16 |
| Table S2. Comparison of the experimental and computed <sup>13</sup> C NMR chemical shifts for <b>1</b> , 14 <i>R</i> ,15 <i>R</i> ,18 <i>S</i> - <b>1</b> and 14 <i>R</i> ,15 <i>R</i> ,18 <i>R</i> - <b>1</b> ). ....                                     | 17 |
| Table S3. <sup>1</sup> H NMR (600 MHz) and <sup>13</sup> C NMR (150 MHz) data for compound <b>4</b> in CDCl <sub>3</sub> ( $\delta$ in ppm and <i>J</i> in Hz). ....                                                                                       | 18 |
| Table S4. Oligonucleotides used in the study ....                                                                                                                                                                                                          | 19 |
| Table S5. Gibbs free energies <sup>a</sup> and equilibrium populations <sup>b</sup> of low-energy conformers of 14 <i>R</i> ,15 <i>R</i> ,18 <i>S</i> - <b>1</b> . ....                                                                                    | 19 |
| Table S6. Cartesian coordinates for the low-energy reoptimized random research conformers of 14 <i>R</i> ,15 <i>R</i> ,18 <i>S</i> - <b>1</b> at B3LYP-D3(BJ)/6-31G* level of theory in methanol. ....                                                     | 20 |
| Table S7. Gibbs free energies <sup>a</sup> and equilibrium populations <sup>b</sup> of low-energy conformers of 14 <i>R</i> ,15 <i>R</i> ,18 <i>R</i> - <b>1</b> . ....                                                                                    | 35 |
| Table S8. Cartesian coordinates for the low-energy reoptimized random research conformers of 14 <i>R</i> ,15 <i>R</i> ,18 <i>R</i> - <b>1</b> at B3LYP-D3(BJ)/6-31G* level of theory in methanol. ....                                                     | 36 |
| Table S9. Gibbs free energies <sup>a</sup> and equilibrium populations <sup>b</sup> of low-energy conformers of <b>1</b> . ....                                                                                                                            | 42 |
| Table S10. Cartesian coordinates for the low-energy reoptimized random research conformers of <b>1</b> at PBE0-D3(BJ)/def2-SVP level of theory in methanol. ....                                                                                           | 44 |

|                                                                                                                                                                 |     |
|-----------------------------------------------------------------------------------------------------------------------------------------------------------------|-----|
| Table S11. Gibbs free energies <sup>a</sup> and equilibrium populations <sup>b</sup> of low-energy conformers of <i>ent-1</i> .                                 | 63  |
| Table S12. Cartesian coordinates for the low-energy reoptimized random research conformers of <i>ent-1</i> at PBE0-D3(BJ)/def2-SVP level of theory in methanol. | 64  |
| Table S13. Energy profiles (a.u.) of the reaction forming the carbocation precursor to <b>IM3</b> at the M06-2X/6-31 G(d,p) level.                              | 80  |
| Table S14. Gibbs free energy (a.u.) and relative free energy (kcal/mol) of deprotonation product at the M06-2X/6-31 G(d,p) level.                               | 80  |
| Sequence S1. The protein sequence of PstA                                                                                                                       | 84  |
| Sequence S2. The nucleotide sequence of <i>pstA</i> gene                                                                                                        | 84  |
| Sequence S3. The nucleotide sequence of <i>pstB</i> gene                                                                                                        | 85  |
| Figure S19. <sup>1</sup> H NMR spectrum of Penisentene ( <b>1</b> ) in CDCl <sub>3</sub> .                                                                      | 87  |
| Figure S20. <sup>13</sup> C NMR and DEPT spectra of Penisentene ( <b>1</b> ) in CDCl <sub>3</sub> .                                                             | 88  |
| Figure S21. HSQC spectrum of Penisentene ( <b>1</b> ) in CDCl <sub>3</sub> .                                                                                    | 89  |
| Figure S22. HMBC spectrum of Penisentene ( <b>1</b> ) in CDCl <sub>3</sub> .                                                                                    | 90  |
| Figure S23. <sup>1</sup> H- <sup>1</sup> H COSY spectrum of Penisentene ( <b>1</b> ) in CDCl <sub>3</sub> .                                                     | 91  |
| Figure S24. NOESY spectrum of Penisentene ( <b>1</b> ) in CDCl <sub>3</sub> .                                                                                   | 92  |
| Figure S25. <sup>1</sup> H NMR spectrum of Penisentanol ( <b>2</b> ) in CDCl <sub>3</sub> .                                                                     | 93  |
| Figure S26. <sup>13</sup> C NMR and DEPT spectra of Penisentanol ( <b>2</b> ) in CDCl <sub>3</sub> .                                                            | 94  |
| Figure S27. HSQC spectrum of Penisentanol ( <b>2</b> ) in CDCl <sub>3</sub> .                                                                                   | 95  |
| Figure S28. HMBC spectrum of Penisentanol ( <b>2</b> ) in CDCl <sub>3</sub> .                                                                                   | 96  |
| Figure S29. <sup>1</sup> H- <sup>1</sup> H COSY spectrum of Penisentanol ( <b>2</b> ) in CDCl <sub>3</sub> .                                                    | 97  |
| Figure S30. NOESY spectrum of Penisentanol ( <b>2</b> ) in CDCl <sub>3</sub> .                                                                                  | 98  |
| Figure S31. <sup>1</sup> H NMR spectrum of Penisentone ( <b>3</b> ) in CDCl <sub>3</sub> .                                                                      | 99  |
| Figure S32. <sup>13</sup> C NMR and DEPT spectra of Penisentone ( <b>3</b> ) in CDCl <sub>3</sub> .                                                             | 100 |
| Figure S33. HSQC spectrum of Penisentone ( <b>3</b> ) in CDCl <sub>3</sub> .                                                                                    | 101 |
| Figure S34. HMBC spectrum of Penisentone ( <b>3</b> ) in CDCl <sub>3</sub> .                                                                                    | 102 |
| Figure S35. <sup>1</sup> H- <sup>1</sup> H COSY spectrum of Penisentone ( <b>3</b> ) in CDCl <sub>3</sub> .                                                     | 103 |
| Figure S36. NOESY spectrum of Penisentone ( <b>3</b> ) in CDCl <sub>3</sub> .                                                                                   | 104 |
| Figure S37. <sup>1</sup> H NMR spectrum of Derivepenisentene ( <b>4</b> ) in CDCl <sub>3</sub> .                                                                | 105 |
| Figure S38. <sup>13</sup> C NMR and DEPT spectra of Derivepenisentene ( <b>4</b> ) in CDCl <sub>3</sub> .                                                       | 106 |
| Figure S39. HSQC spectrum of Derivepenisentene ( <b>4</b> ) in CDCl <sub>3</sub> .                                                                              | 107 |
| Figure S40. HMBC spectrum of Derivepenisentene ( <b>4</b> ) in CDCl <sub>3</sub> .                                                                              | 108 |
| Figure S41. <sup>1</sup> H- <sup>1</sup> H COSY spectrum of Derivepenisentene ( <b>4</b> ) in CDCl <sub>3</sub> .                                               | 109 |
| Figure S42. NOESY spectrum of Derivepenisentene ( <b>4</b> ) in CDCl <sub>3</sub> .                                                                             | 110 |
| Figure S43. Experimental ECD and UV spectra of <b>1-3</b> .                                                                                                     | 111 |
| Figure S44. IR spectrum of <b>1</b> .                                                                                                                           | 112 |

**Figure S1. Phylogenetic tree of TC domains of BFTs. (A) 115 (putative) BFTs found in public database. (B) 15 representative BFTs belongs to different clades.**

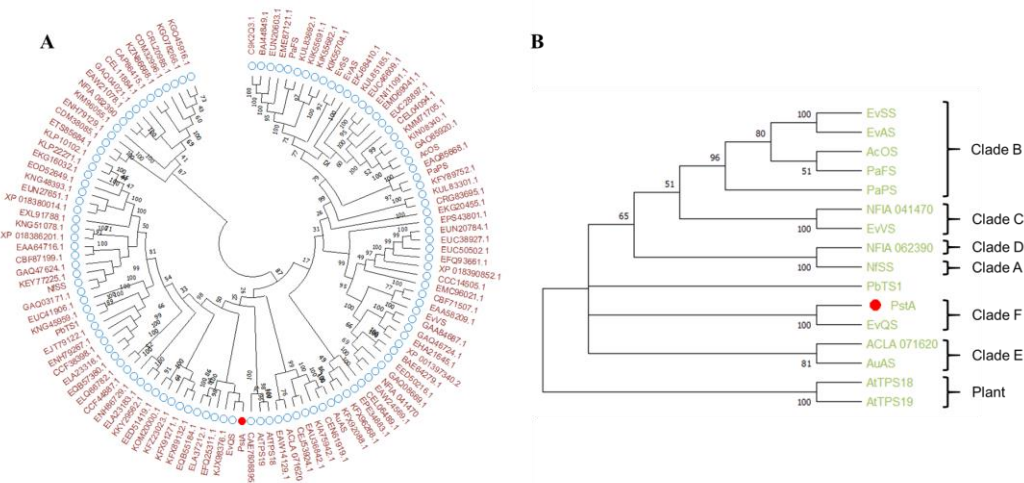

**Figure S2. Representative sesterterpenoids with 5/15 *trans*-fused bicyclic ring system.**

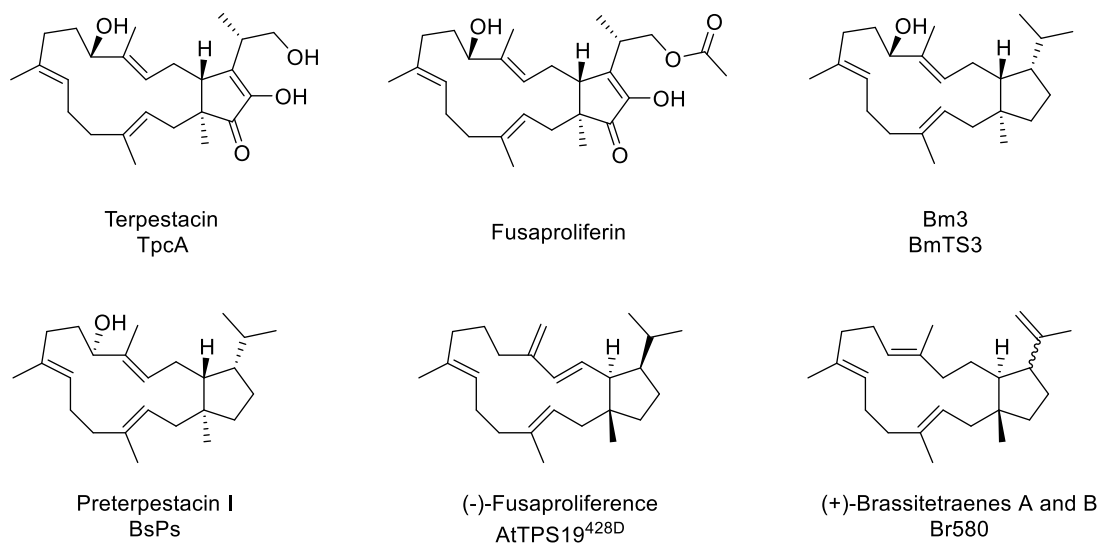

Figure S3. GC-MS analysis for the extract of metabolites of AO-PstA.

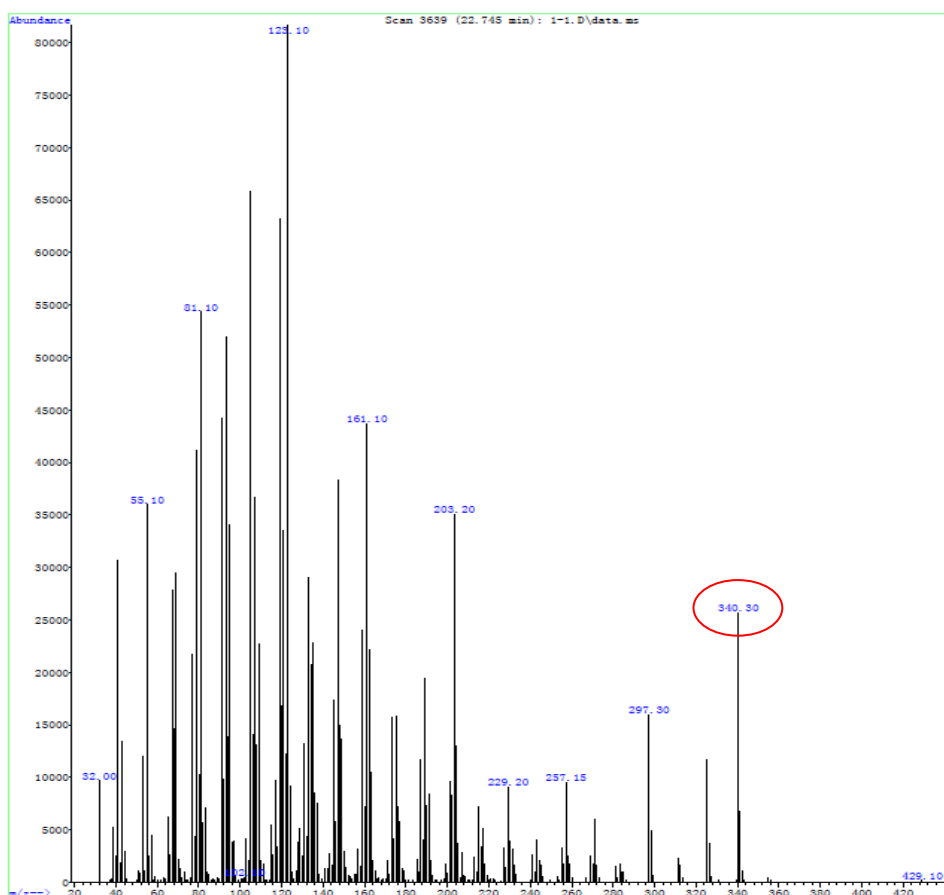

Figure S4. Chemdraw 3D models at C12/13 double bond of 1.

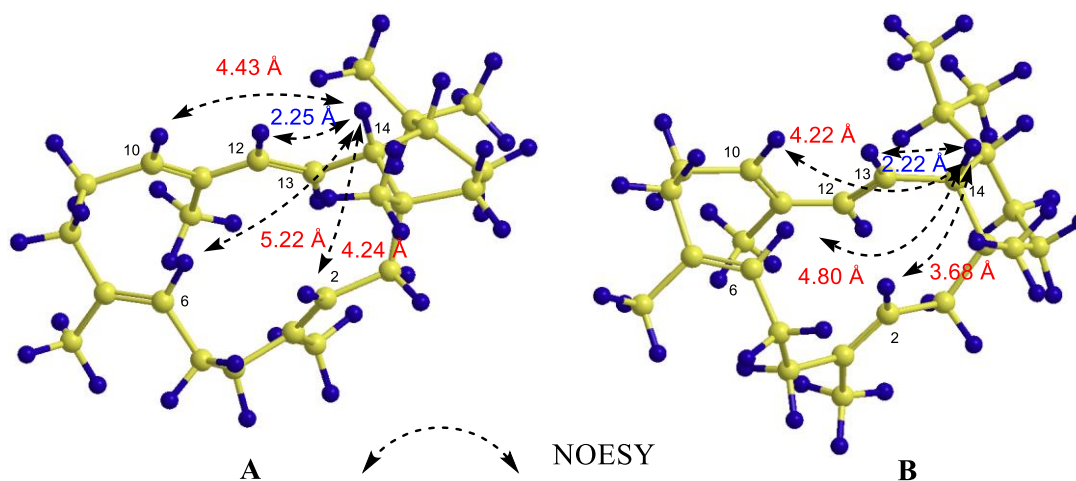

**Figure S5. Two most possible C-18 isomers of 1.**

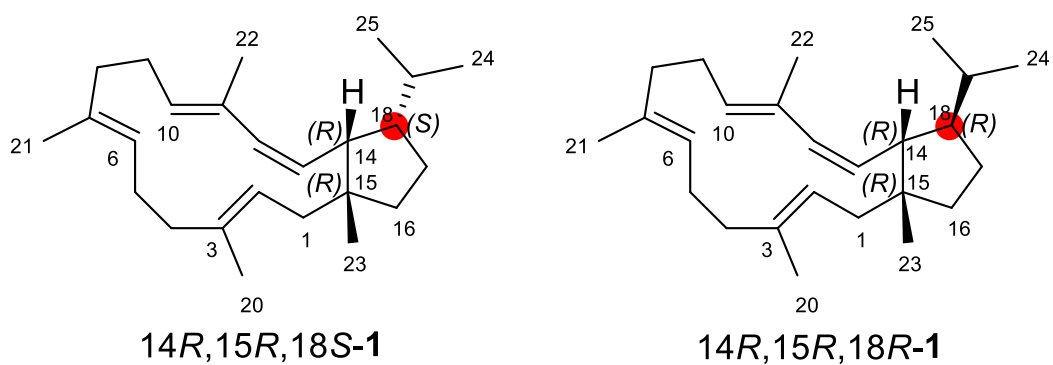

**Figure S6.  $^{13}\text{C}$  NMR calculation results of two possible isomers of 1.**

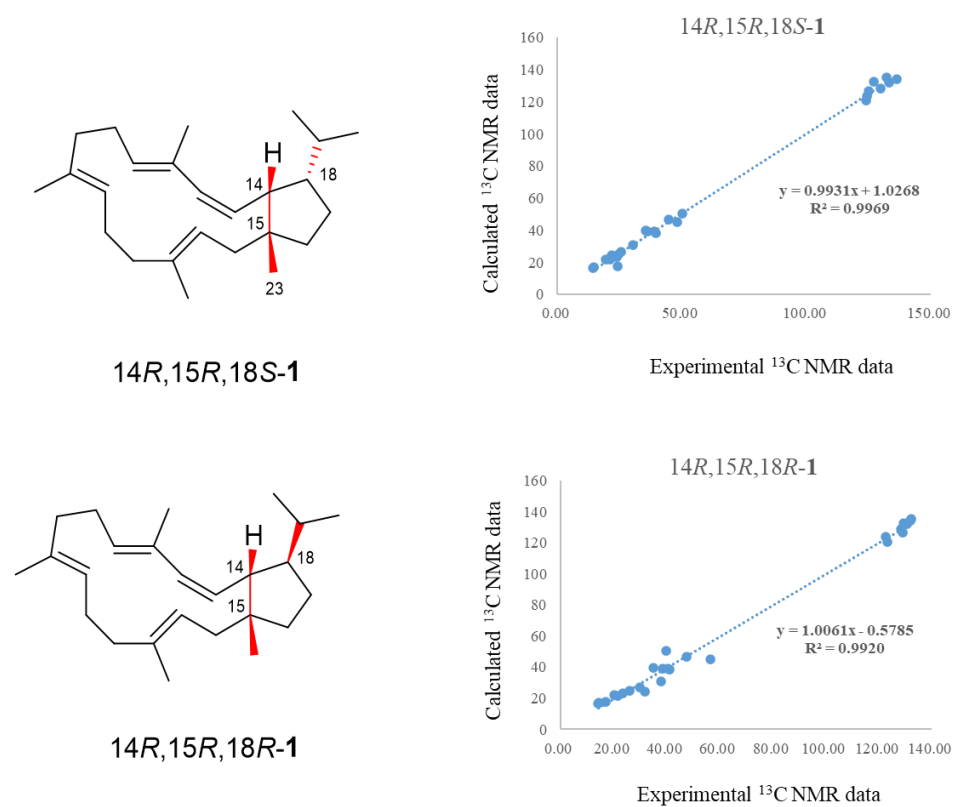

**Figure S7. Chemical transformation of 1.**

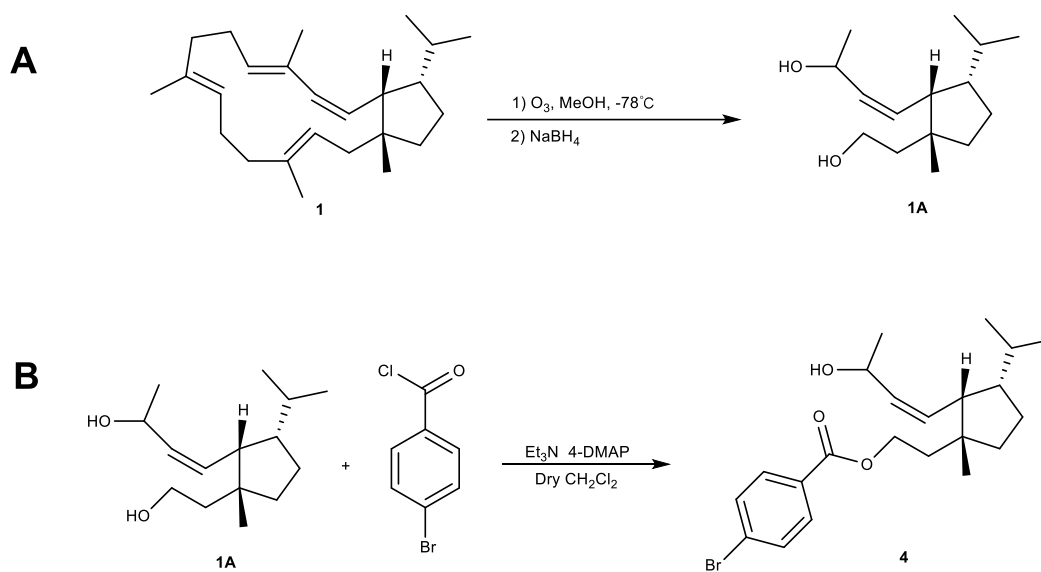

**Figure S8. The key NOESY correlations of 4.**

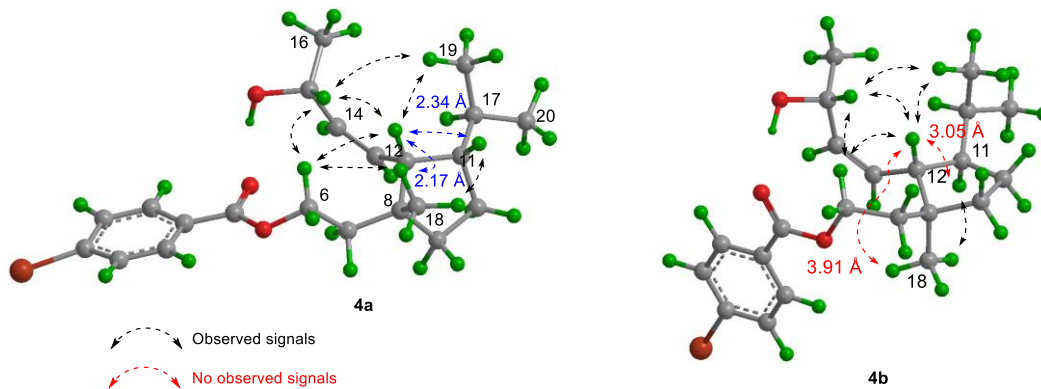

**Figure S9.** The absolute configuration of **1** and its enantiomer (*ent-1*).

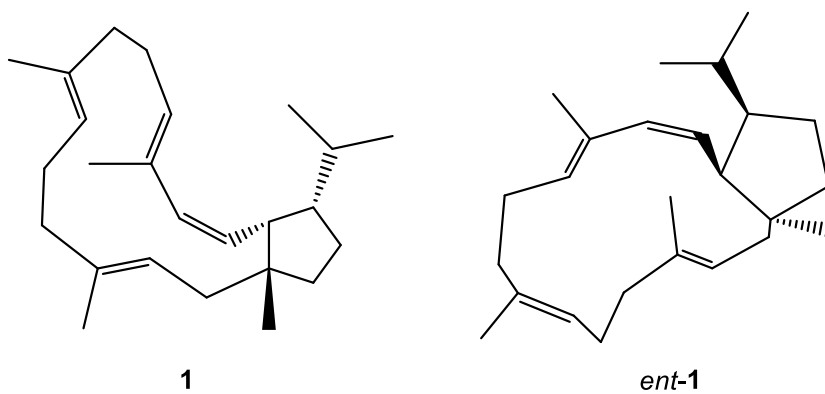



Figure S10. <sup>1</sup>H NMR spectrum (dark color) of Penisentene (1) produced by *E. coli* BL21 (compare to stand, light colour).

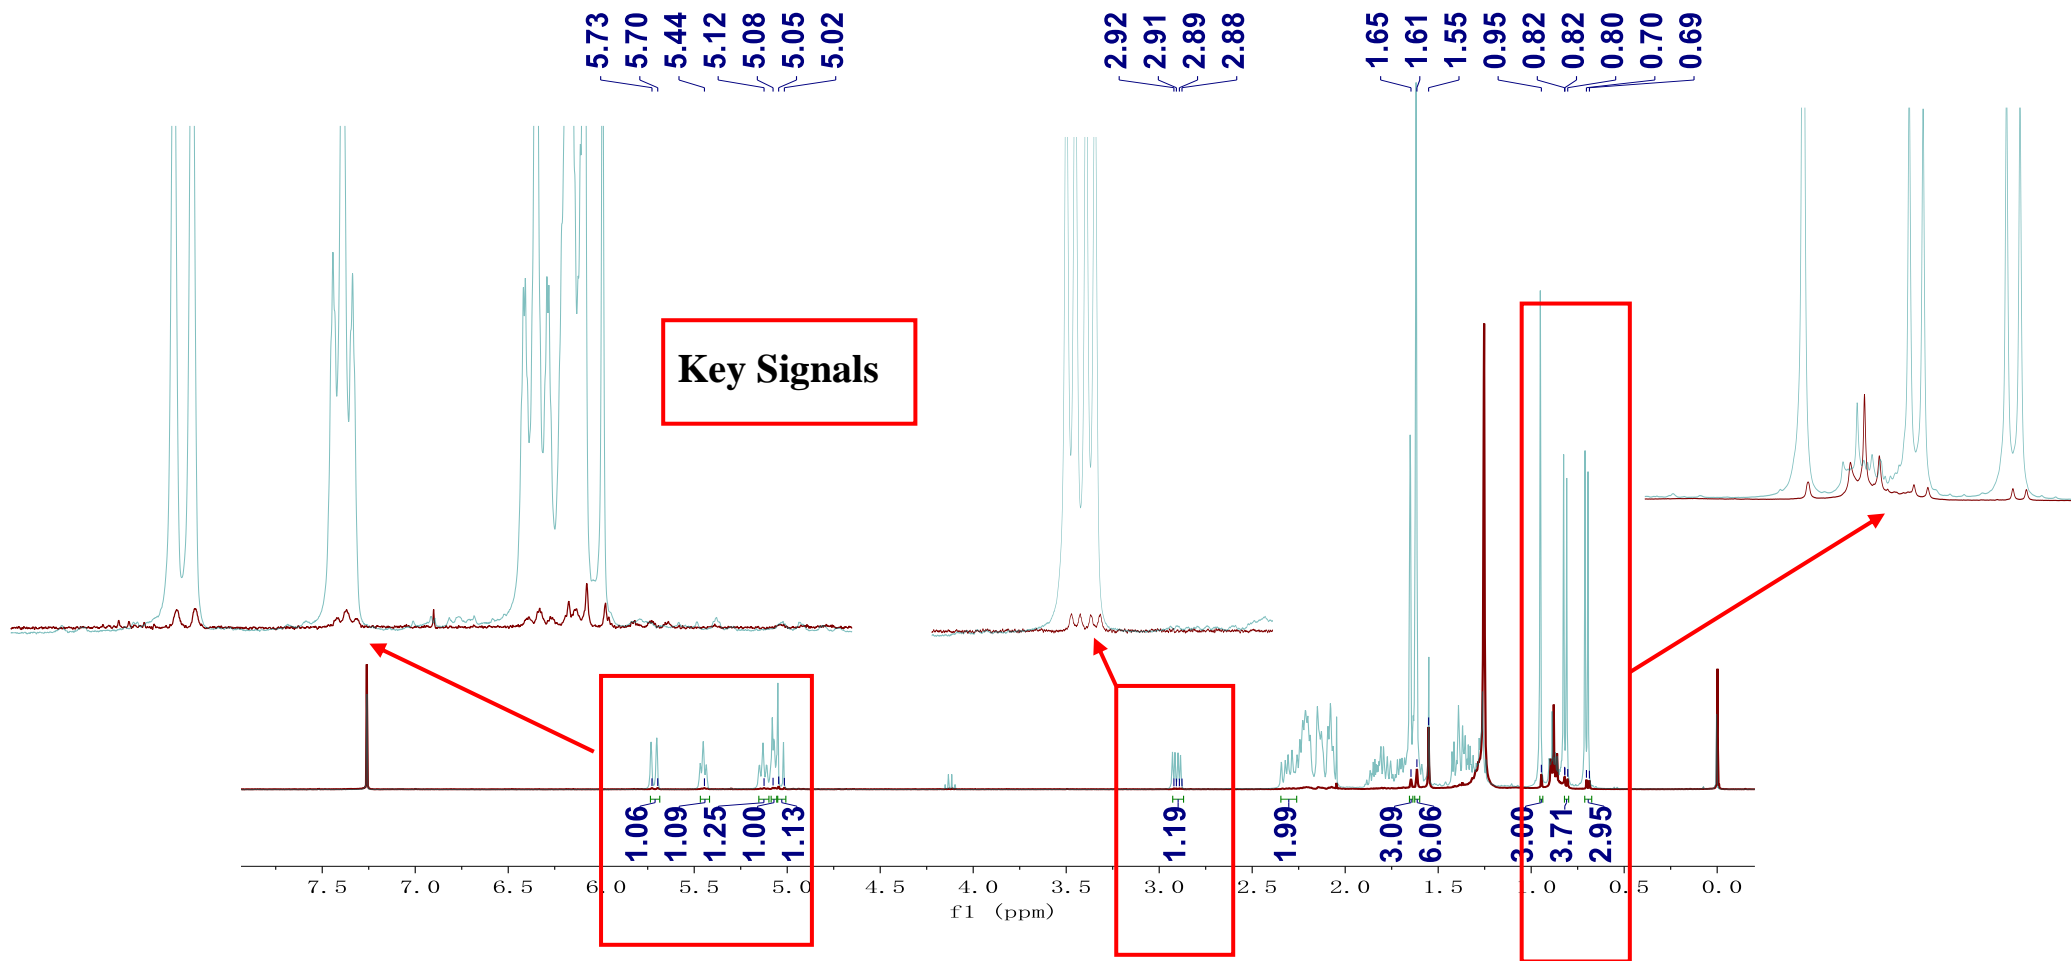

Figure S11.  $^{13}\text{C}$  NMR spectrum of **1** prepared by feeding experiment with  $[1\text{-}^{13}\text{C}, \text{}^2\text{H}_3]\text{acetate}$  (compare to stand, light colour; and the shifted signals marked on the top of peaks).

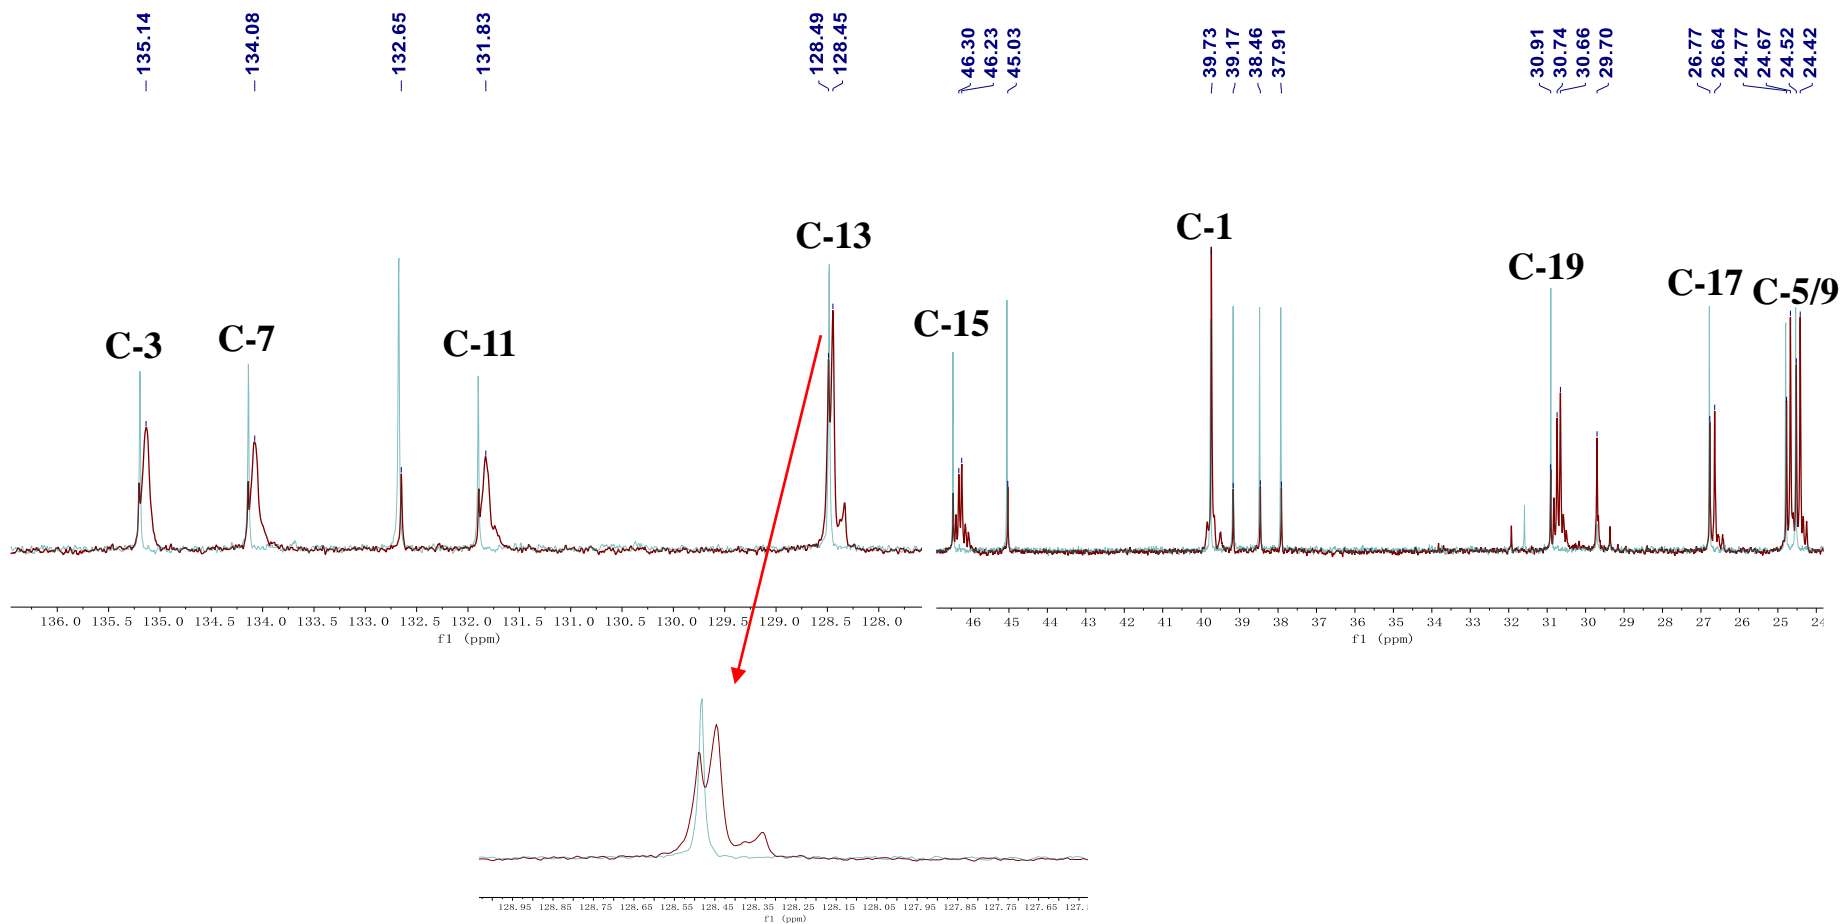

### Scheme S1. Two possible pathways.

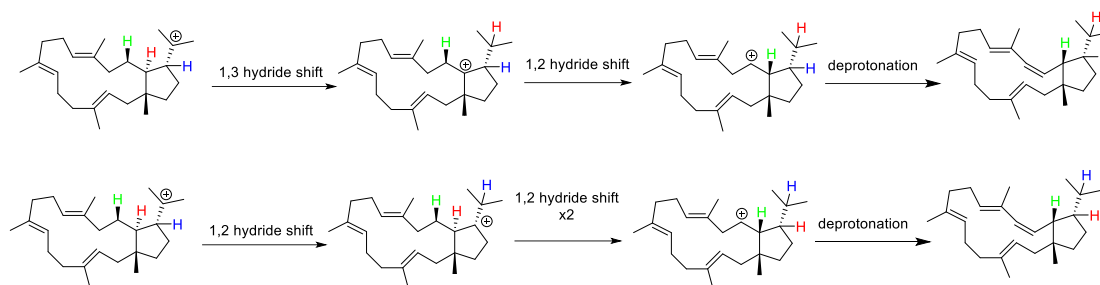

**Figure S12. Deprotonation pathways from IM3 to product penisentene in the gas phase. Relative free energies (kcal/mol) are labeled with red numbers in parentheses. Structures are optimized at the M06-2X/6-31 G(d,p) level in the gas phase.**

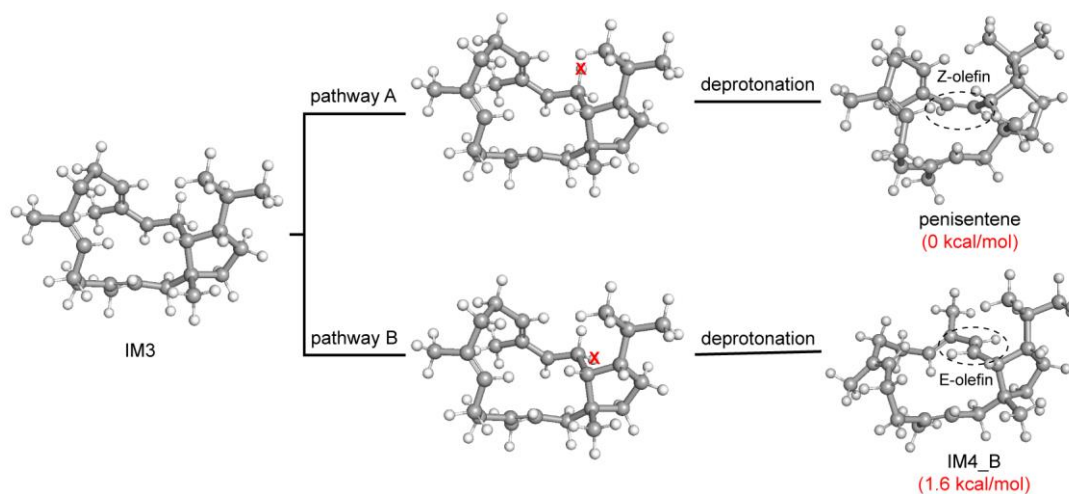

There are two dehydrogenation pathways from **IM3**, one to abstract the proton out of the plane (pathway A) and the other to abstract hydrogen receding away from the plane (pathway B). The abstracted proton is marked with a red fork. According to the DFT calculation result, two pathways produce two products with different structures, and the product penisentene with Z-olefin of pathway A has lower energy.

**Figure S13. Cell free assay of *E. coli-pstA*.**

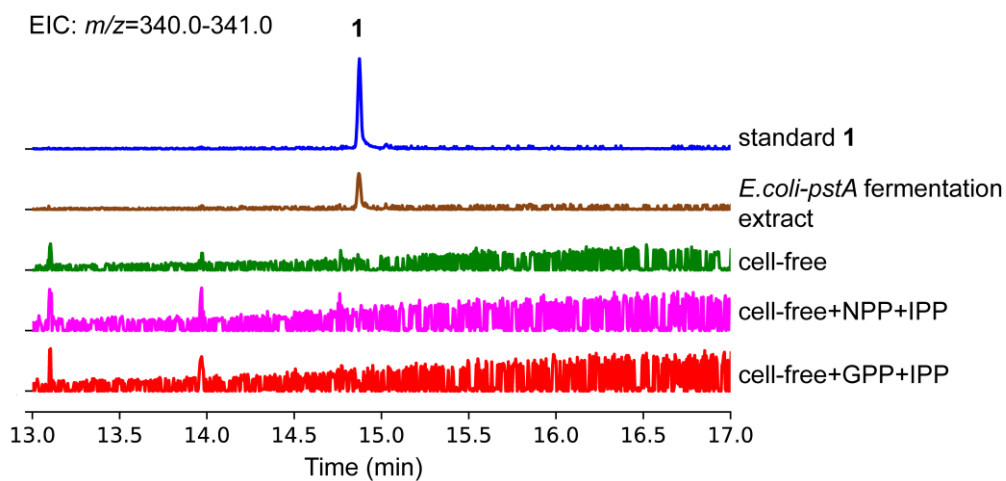

**Figure S14. GC-MS analysis for the extract of metabolites of AO-PstAB.**

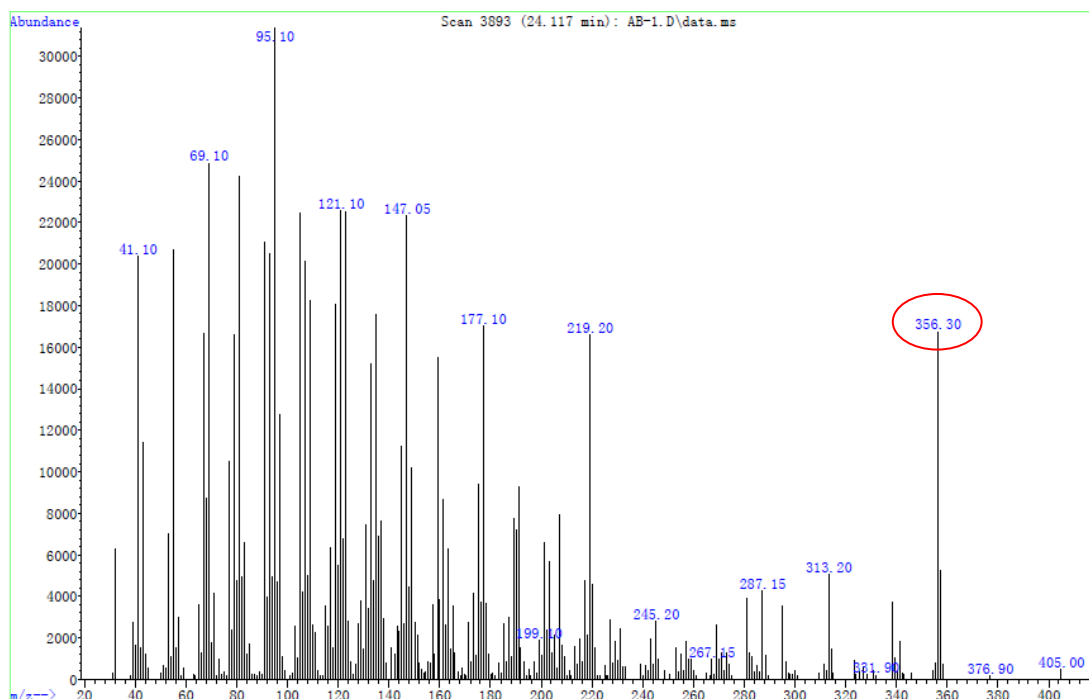

Figure S15. IR spectrum of 2.

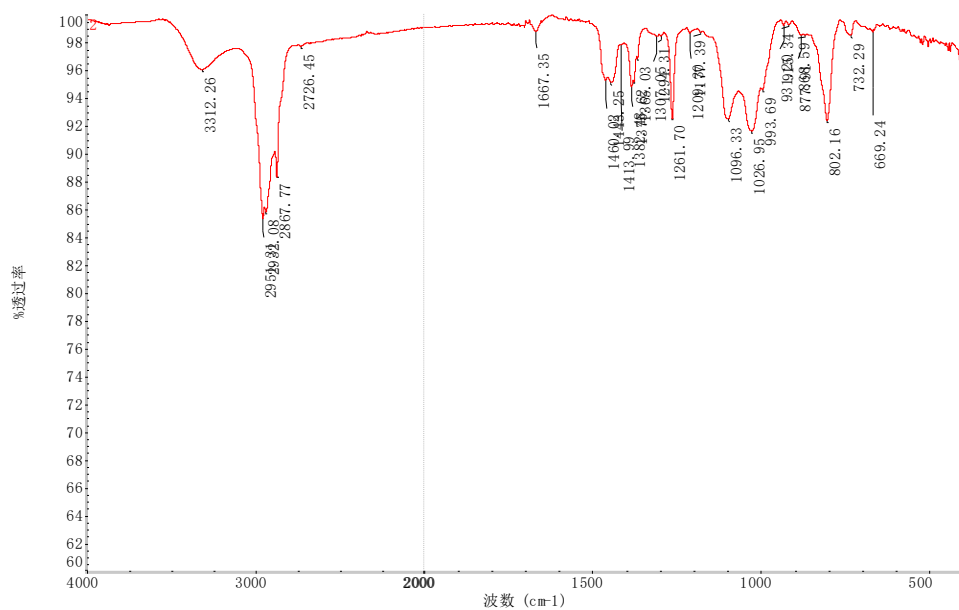

Figure S16. HRESIMS spectrum of Penisentone (3).

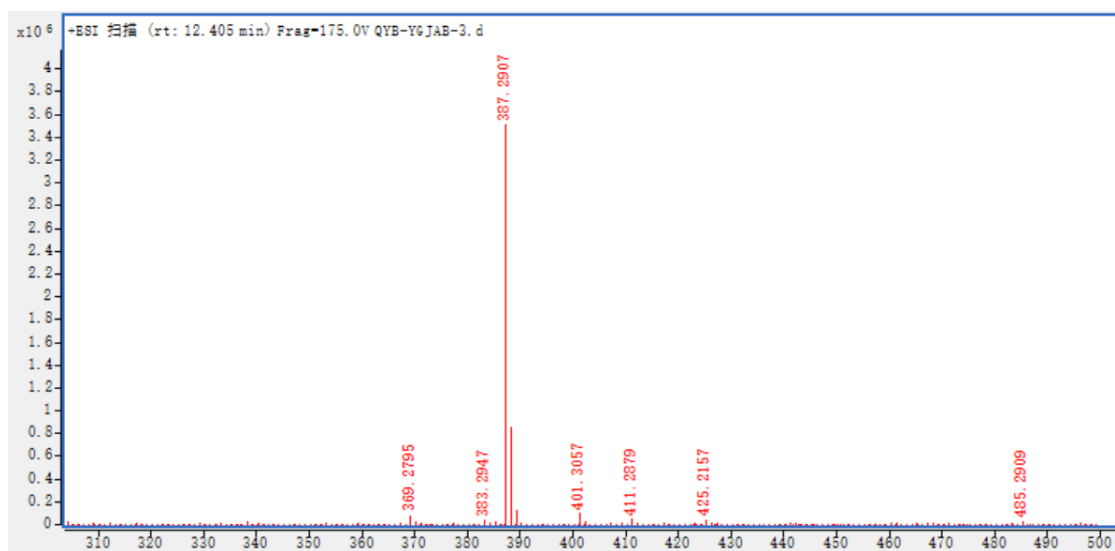

Figure S17. IR spectrum of 3.

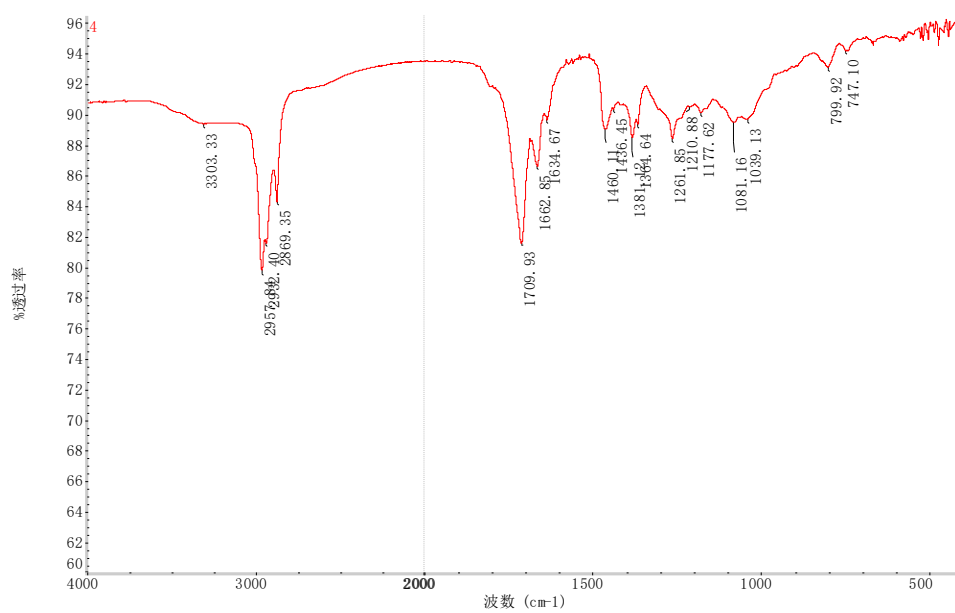

**Figure S18. Possible oxidative transformations of 3 and chaetoglobosins.**

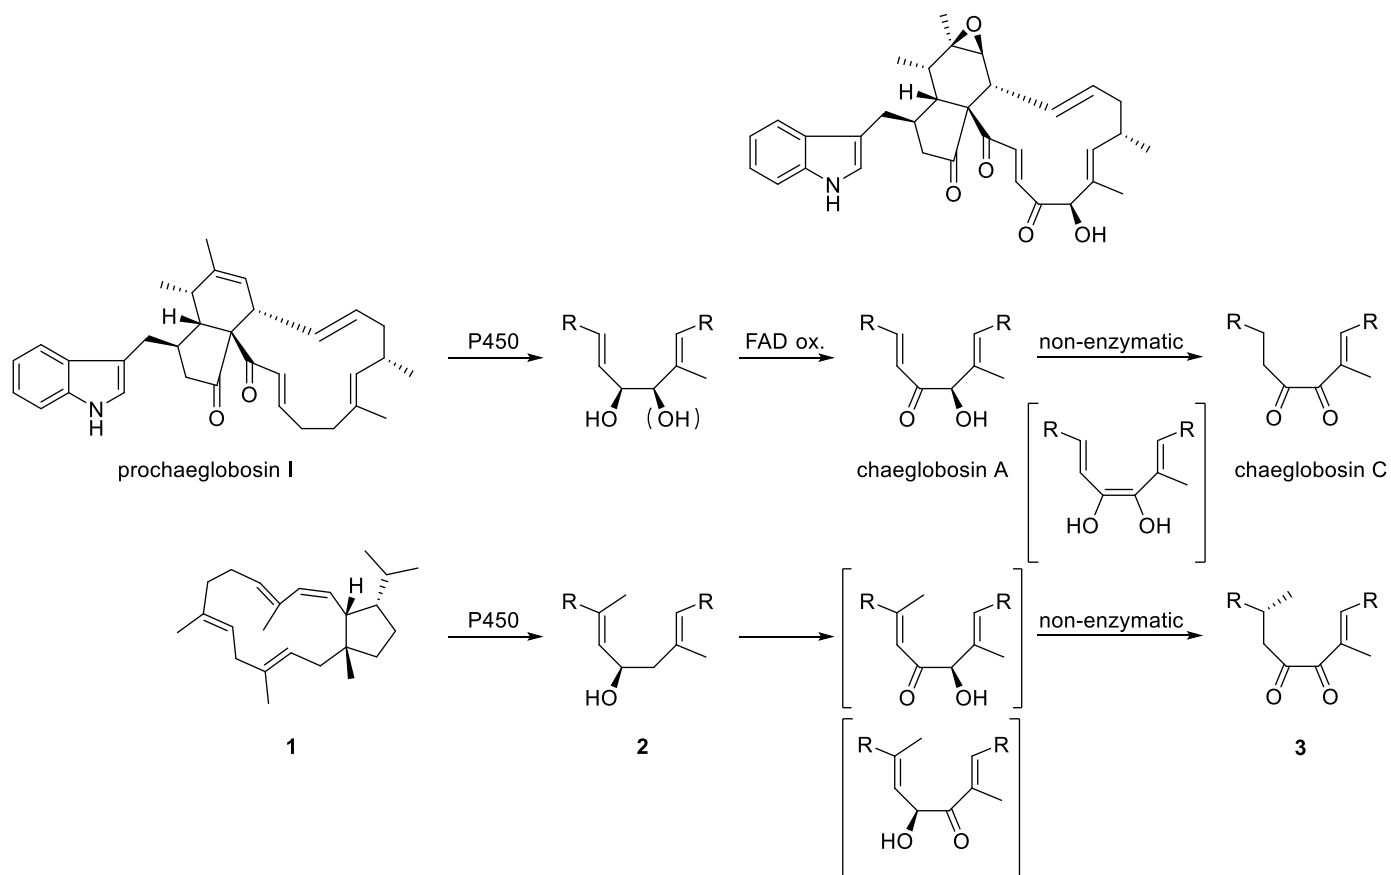

**Table S1.  $^1\text{H}$  NMR (400 MHz) and  $^{13}\text{C}$  NMR (100 MHz) data for compound 1–3 in  $\text{CDCl}_3$  ( $\delta$  in ppm and  $J$  in Hz).**

| No. | 1                    |                            | 2                    |                            | 3                          |                            |
|-----|----------------------|----------------------------|----------------------|----------------------------|----------------------------|----------------------------|
|     | $\delta_{\text{H}}$  | $\delta_{\text{C}}$ , type | $\delta_{\text{H}}$  | $\delta_{\text{C}}$ , type | $\delta_{\text{H}}$        | $\delta_{\text{C}}$ , type |
| 1a  | 1.77, m              |                            | 1.70, m              |                            | 1.78, m                    |                            |
| 1b  | 2.30, dd (14.5, 8.4) | 39.8, $\text{CH}_2$        | 2.23, m              | 39.4, $\text{CH}_2$        | 2.40, dd (14.7, 10.2)      | 40.6, $\text{CH}_2$        |
| 2   | 5.13, tq (7.8, 1.4)  | 120.7, CH                  | 4.99, tq (7.6, 2.7)  | 120.8, CH                  | 5.53, ddt (10.2, 4.6, 1.5) | 121.5, CH                  |
| 3   |                      | 135.1, C                   |                      | 135.0, C                   |                            | 136.8, C                   |
| 4a  | 1.36, m              |                            | 2.07, m              |                            | 4.39, br s                 |                            |
| 4b  | 1.61, m              | 38.5, $\text{CH}_2$        | 2.07, m              | 38.6, $\text{CH}_2$        |                            | 73.3, CH                   |
| 5a  | 2.07, m              |                            | 2.15, m              |                            | 2.70, m                    |                            |
| 5b  | 2.19, m              | 24.8, $\text{CH}_2$        | 2.18, m              | 24.6, $\text{CH}_2$        | 2.90, ddd (15.9, 9.3, 2.3) | 33.8, $\text{CH}_2$        |
| 6   | 5.07, m              | 123.6, CH                  | 5.06, tq (6.0, 2.7)  | 126.3, CH                  | 6.57, ddd (9.3, 4.7, 1.3)  | 146.2, CH                  |
| 7   |                      | 134.1, C                   |                      | 131.2, C                   |                            | 135.9, C                   |
| 8a  | 2.08, m              |                            | 2.28, m              |                            |                            |                            |
| 8b  | 2.15, m              | 39.2, $\text{CH}_2$        | 2.28, m              | 46.9, $\text{CH}_2$        |                            | 197.6, C                   |
| 9   | 2.07, 2H, m          | 24.5, $\text{CH}_2$        | 4.53, m              | 67.0, CH                   |                            | 203.8, C                   |
| 10a |                      |                            |                      |                            | 2.29, dd (12.1, 11.2)      |                            |
| 10b | 5.45, tq (6.6, 1.4)  | 126.6, CH                  | 5.37, dq (8.6, 2.2)  | 129.3, CH                  | 2.80, dd (12.1, 0.9)       | 46.2, $\text{CH}_2$        |
| 11  |                      | 131.9, C                   |                      | 136.1, C                   | 2.75, m                    | 26.9, CH                   |
| 12  | 5.72, d (12.2)       | 132.7, CH                  | 5.79, d (11.9)       | 132.6, CH                  | 5.34, t (10.5)             | 134.5, CH                  |
| 13  | 5.04, t (12.2)       | 128.5, CH                  | 5.19, t (11.9)       | 129.8, CH                  | 5.12, t (11.2)             | 126.8, CH                  |
| 14  | 2.91, dd (11.9, 5.4) | 45.1, CH                   | 2.75, dd (11.7, 6.3) | 45.3, CH                   | 2.46, dd (11.4, 6.2)       | 45.3, CH                   |
| 15  |                      | 46.5, C                    |                      | 46.3, C                    |                            | 45.3, C                    |
| 16  | 2.12, 2H, m          | 37.9, $\text{CH}_2$        | 1.42, 2H, m          | 37.9, $\text{CH}_2$        | 1.48, 2H, m                | 39.4, $\text{CH}_2$        |
| 17a | 1.35, m              |                            | 1.43, m              |                            | 1.44, m                    |                            |
| 17b | 1.81, m              | 26.8, $\text{CH}_2$        | 1.78, m              | 26.9, $\text{CH}_2$        | 1.82, m                    | 27.8, $\text{CH}_2$        |
| 18  | 1.69, dd (10.1, 5.5) | 50.5, CH                   | 1.73, m              | 50.2, CH                   | 1.61, m                    | 51.0, CH                   |
| 19  | 1.32, m              | 30.9, CH                   | 1.44, m              | 30.4, CH                   | 1.36, m                    | 29.6, CH                   |
| 20  | 1.62, s              | 16.7, $\text{CH}_3$        | 1.57, s              | 16.7, $\text{CH}_3$        | 1.60, s                    | 14.0, $\text{CH}_3$        |
| 21  | 1.62, s              | 17.1, $\text{CH}_3$        | 1.65, s              | 17.7, $\text{CH}_3$        | 1.85, s                    | 10.6, $\text{CH}_3$        |
| 22  | 1.65, s              | 17.7, $\text{CH}_3$        | 1.71, dd (0.9, 0.6)  | 18.0, $\text{CH}_3$        | 1.10, d (6.5)              | 20.2, $\text{CH}_3$        |
| 23  | 0.95, s              | 23.4, $\text{CH}_3$        | 0.88, s              | 23.8, $\text{CH}_3$        | 0.91, s                    | 24.8, $\text{CH}_3$        |
| 24  | 0.82, d (6.6)        | 22.0, $\text{CH}_3$        | 0.83, d (6.5)        | 22.7, $\text{CH}_3$        | 0.83, d (6.5)              | 22.0, $\text{CH}_3$        |
| 25  | 0.70, d (6.4)        | 21.8, $\text{CH}_3$        | 0.82, d (6.5)        | 21.9, $\text{CH}_3$        | 0.63, d (6.4)              | 22.0, $\text{CH}_3$        |



**Table S2. Comparison of the experimental and computed  $^{13}\text{C}$  NMR chemical shifts for 1, 14R,15R,18S-1 and 14R,15R,18R-1).**

| No.                                 | 1      |        | 14R,15R,18S-1  |                  | 14R,15R,18R-1 |                |                  |
|-------------------------------------|--------|--------|----------------|------------------|---------------|----------------|------------------|
|                                     | Exptl. | Calcd. | $\Delta\delta$ | $ \Delta\delta $ | Calcd.        | $\Delta\delta$ | $ \Delta\delta $ |
| 1                                   | 39.8   | 35.27  | -4.53          | 4.53             | 35.00         | -4.80          | 4.80             |
| 2                                   | 120.7  | 124.03 | 3.33           | 3.33             | 123.30        | 2.60           | 2.60             |
| 3                                   | 135.1  | 131.96 | -3.14          | 3.14             | 132.33        | -2.77          | 2.77             |
| 4                                   | 38.5   | 39.50  | 1.00           | 1.00             | 41.07         | 2.57           | 2.57             |
| 5                                   | 24.8   | 24.29  | -0.51          | 0.51             | 26.06         | 1.26           | 1.26             |
| 6                                   | 123.6  | 124.27 | 0.67           | 0.67             | 122.68        | -0.92          | 0.92             |
| 7                                   | 134.1  | 136.05 | 1.95           | 1.95             | 132.04        | -2.06          | 2.06             |
| 8                                   | 39.2   | 38.73  | -0.47          | 0.47             | 38.51         | -0.69          | 0.69             |
| 9                                   | 24.5   | 21.67  | -2.83          | 2.83             | 31.75         | 7.25           | 7.25             |
| 10                                  | 126.6  | 124.84 | -1.76          | 1.76             | 129.06        | 2.46           | 2.46             |
| 11                                  | 131.9  | 133.29 | 1.39           | 1.39             | 130.66        | -1.24          | 1.24             |
| 12                                  | 132.7  | 126.98 | -5.72          | 5.72             | 129.42        | -3.28          | 3.28             |
| 13                                  | 128.5  | 129.79 | 1.29           | 1.29             | 128.35        | -0.15          | 0.15             |
| 14                                  | 45.1   | 48.00  | 2.90           | 2.90             | 56.41         | 11.31          | 11.31            |
| 15                                  | 46.5   | 44.73  | -1.77          | 1.77             | 47.61         | 1.11           | 1.11             |
| 16                                  | 37.9   | 36.14  | -3.06          | 3.06             | 40.32         | 1.12           | 1.12             |
| 17                                  | 26.8   | 25.38  | -1.42          | 1.42             | 29.74         | 2.94           | 2.94             |
| 18                                  | 50.5   | 50.21  | -0.29          | 0.29             | 39.69         | -10.81         | 10.81            |
| 19                                  | 30.9   | 30.40  | -0.50          | 0.50             | 37.86         | 6.96           | 6.96             |
| 20                                  | 16.7   | 14.19  | -2.51          | 2.51             | 14.24         | -2.46          | 2.46             |
| 21                                  | 17.1   | 14.64  | -2.46          | 2.46             | 14.47         | -2.63          | 2.63             |
| 22                                  | 17.7   | 24.22  | 6.52           | 6.52             | 16.97         | -0.73          | 0.73             |
| 23                                  | 23.4   | 23.76  | 0.36           | 0.36             | 23.47         | 0.07           | 0.07             |
| 24                                  | 22.0   | 21.04  | -0.96          | 0.96             | 20.25         | -1.75          | 1.75             |
| 25                                  | 21.8   | 19.26  | -2.54          | 2.54             | 21.42         | -0.38          | 0.38             |
| AveDev: average absolute deviations |        |        |                | 2.08             |               |                | 2.97             |
| MaxDev: maximum absolute deviations |        |        |                | 6.52             |               |                | 11.31            |
| $R^2$ : coefficients                |        |        |                | 0.9969           |               |                | 0.9920           |

**Table S3.  $^1\text{H}$  NMR (600 MHz) and  $^{13}\text{C}$  NMR (150 MHz) data for compound 4 in  $\text{CDCl}_3$  ( $\delta$  in**

**ppm and  $J$  in Hz).**

| No. | <b>4</b>             |                            |
|-----|----------------------|----------------------------|
|     | $\delta_{\text{H}}$  | $\delta_{\text{C}}$ , type |
| 1   |                      | 129.3, C                   |
| 2   | 7.58, dt (8.7, 2.4)  | 131.7, CH                  |
| 2   | 7.58, dt (8.7, 2.4)  | 131.7, CH                  |
| 3   | 7.90, dt (8.7, 2.4)  | 131.1, CH                  |
| 3   | 7.90, dt (8.7, 2.4)  | 131.1, CH                  |
| 4   |                      | 128.0, C                   |
| 5   |                      | 165.9, C                   |
| 6   | 4.38, 2H, m          | 62.8, $\text{CH}_2$        |
| 7   | 1.88, m              | 40.2, $\text{CH}_2$        |
| 7   | 1.81, m              |                            |
| 8   |                      | 44.4, C                    |
| 9   | 1.59, m              | 37.1, $\text{CH}_2$        |
| 9   | 1.51, m              |                            |
| 10  | 1.88, m              | 37.9, $\text{CH}_2$        |
| 10  | 1.51, m              | 27.7, $\text{CH}_2$        |
| 11  | 1.81, m              | 50.4, CH                   |
| 12  | 2.69, dd (11.8, 6.0) | 48.6, C                    |
| 13  | 5.24, td (11.8, 0.7) | 129.0, CH                  |
| 14  | 5.51, dd (11.2, 9.4) | 134.3, CH                  |
| 15  | 4.64, m              | 63.9, CH                   |
| 16  | 1.24, d (6.3)        | 23.8, $\text{CH}_3$        |
| 17  | 1.43, m              | 30.1, CH                   |
| 18  | 0.91, s              | 23.9, $\text{CH}_3$        |
| 19  | 0.84, d (6.4)        | 21.9, $\text{CH}_3$        |
| 20  | 0.85, d (6.6)        | 22.0, $\text{CH}_3$        |

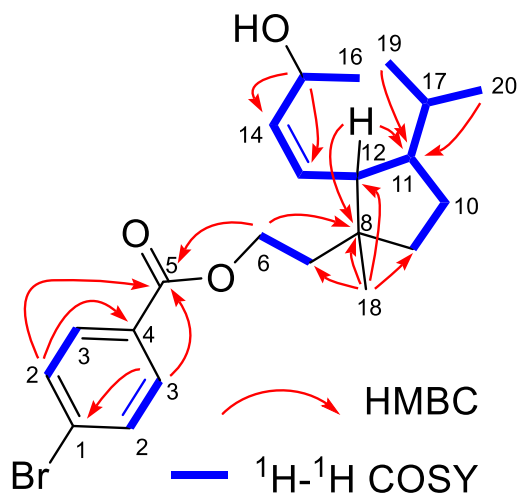



**Table S6. Cartesian coordinates for the low-energy reoptimized random research conformers of 14R,15R,18S-1 at B3LYP-D3(BJ)/6-31G\* level of theory in methanol.**

| 14R,15R,18S-1000001_en_ |               | Standard Orientation (A.U.) |            |           |           |
|-------------------------|---------------|-----------------------------|------------|-----------|-----------|
| Center number           | Atomic number | Atomic Type                 | X          | Y         | Z         |
| 0                       | 6             | 0                           | -7.136974  | 2.298575  | -0.883273 |
| 1                       | 6             | 0                           | -8.726217  | 0.063817  | -1.58812  |
| 2                       | 6             | 0                           | -7.158241  | -1.81185  | -3.207246 |
| 3                       | 6             | 0                           | -5.119642  | -3.240331 | -1.794253 |
| 4                       | 6             | 0                           | -2.660411  | -2.8264   | -2.276758 |
| 5                       | 6             | 0                           | 2.185447   | 2.857571  | -2.620845 |
| 6                       | 6             | 0                           | 2.180425   | 5.065899  | -0.89749  |
| 7                       | 6             | 0                           | 0.527703   | 5.437766  | 0.997159  |
| 8                       | 6             | 0                           | -1.621921  | 3.732455  | 1.679465  |
| 9                       | 6             | 0                           | -4.249314  | 5.020224  | 1.520757  |
| 10                      | 6             | 0                           | -6.274555  | 3.005058  | 1.388896  |
| 11                      | 6             | 0                           | -0.441708  | -4.313805 | -1.283982 |
| 12                      | 6             | 0                           | 1.098063   | -3.285187 | 1.009554  |
| 13                      | 6             | 0                           | 2.665309   | -0.769318 | 0.506045  |
| 14                      | 6             | 0                           | 3.153664   | -5.306234 | 1.648345  |
| 15                      | 6             | 0                           | 5.599568   | -4.328682 | 0.467799  |
| 16                      | 6             | 0                           | 5.477282   | -1.513157 | 1.124274  |
| 17                      | 6             | 0                           | 7.59322    | 0.211018  | 0.096745  |
| 18                      | 6             | 0                           | 9.909524   | 0.101913  | 1.844193  |
| 19                      | 6             | 0                           | 8.400733   | -0.378148 | -2.626332 |
| 20                      | 6             | 0                           | -0.689804  | -2.926212 | 3.261419  |
| 21                      | 6             | 0                           | 4.157664   | 7.032864  | -1.52522  |
| 22                      | 6             | 0                           | -6.091805  | -5.154277 | 0.082205  |
| 23                      | 6             | 0                           | -6.965898  | 1.764002  | 3.855591  |
| 24                      | 1             | 0                           | 2.106381   | 0.652619  | 1.887151  |
| 25                      | 6             | 0                           | 2.366445   | 0.386377  | -2.067224 |
| 26                      | 1             | 0                           | -6.443879  | 3.363235  | -2.510094 |
| 27                      | 1             | 0                           | -10.355065 | 0.677402  | -2.721624 |
| 28                      | 1             | 0                           | -9.495893  | -0.900478 | 0.072     |
| 29                      | 1             | 0                           | -8.463395  | -3.19385  | -4.049312 |
| 30                      | 1             | 0                           | -6.309353  | -0.764408 | -4.781439 |

|    |   |   |           |           |           |
|----|---|---|-----------|-----------|-----------|
| 31 | 1 | 0 | -2.211505 | -1.340122 | -3.625276 |
| 32 | 1 | 0 | 2.190425  | 3.363524  | -4.622506 |
| 33 | 1 | 0 | 0.698711  | 7.176611  | 2.092523  |
| 34 | 1 | 0 | -1.651271 | 2.120398  | 0.393794  |
| 35 | 1 | 0 | -1.356307 | 2.968469  | 3.592516  |
| 36 | 1 | 0 | -4.309692 | 6.182991  | -0.191357 |
| 37 | 1 | 0 | -4.526569 | 6.292462  | 3.137841  |
| 38 | 1 | 0 | 0.870873  | -4.649747 | -2.856832 |
| 39 | 1 | 0 | -1.100308 | -6.192069 | -0.714711 |
| 40 | 1 | 0 | 3.396663  | -5.431017 | 3.704606  |
| 41 | 1 | 0 | 2.611918  | -7.192176 | 0.988519  |
| 42 | 1 | 0 | 5.575432  | -4.600374 | -1.587968 |
| 43 | 1 | 0 | 7.292781  | -5.270789 | 1.198358  |
| 44 | 1 | 0 | 5.597262  | -1.404324 | 3.197417  |
| 45 | 1 | 0 | 6.868866  | 2.15524   | 0.136214  |
| 46 | 1 | 0 | 10.674081 | -1.82309  | 1.944487  |
| 47 | 1 | 0 | 11.422704 | 1.338895  | 1.156958  |
| 48 | 1 | 0 | 9.429883  | 0.691221  | 3.771441  |
| 49 | 1 | 0 | 9.798071  | 1.008101  | -3.273332 |
| 50 | 1 | 0 | 6.809637  | -0.324329 | -3.940272 |
| 51 | 1 | 0 | 9.279536  | -2.250341 | -2.753443 |
| 52 | 1 | 0 | -2.242374 | -1.647679 | 2.791164  |
| 53 | 1 | 0 | -1.513145 | -4.73787  | 3.842267  |
| 54 | 1 | 0 | 0.327536  | -2.148645 | 4.890701  |
| 55 | 1 | 0 | 6.073445  | 6.259379  | -1.337803 |
| 56 | 1 | 0 | 3.970435  | 7.66868   | -3.493028 |
| 57 | 1 | 0 | 4.000645  | 8.689142  | -0.296542 |
| 58 | 1 | 0 | -6.853926 | -4.21109  | 1.766039  |
| 59 | 1 | 0 | -7.642271 | -6.265926 | -0.732204 |
| 60 | 1 | 0 | -4.633949 | -6.461993 | 0.731625  |
| 61 | 1 | 0 | -5.30018  | 0.921274  | 4.760876  |
| 62 | 1 | 0 | -7.716752 | 3.166097  | 5.189496  |
| 63 | 1 | 0 | -8.38067  | 0.276027  | 3.637555  |
| 64 | 1 | 0 | 2.439867  | -0.905082 | -3.66603  |

| 14R,15R,18S-1000004_en_ |               | Standard Orientation (A.U.) |           |           |           |
|-------------------------|---------------|-----------------------------|-----------|-----------|-----------|
| Center number           | Atomic number | Atomic Type                 | X         | Y         | Z         |
| 0                       | 6             | 0                           | -7.312619 | 1.835658  | -0.908867 |
| 1                       | 6             | 0                           | -9.167043 | -0.201875 | -0.198438 |
| 2                       | 6             | 0                           | -7.825563 | -2.383289 | 1.236961  |
| 3                       | 6             | 0                           | -5.720243 | -3.610449 | -0.260853 |
| 4                       | 6             | 0                           | -3.306138 | -2.933643 | 0.109522  |

|    |   |   |            |           |           |
|----|---|---|------------|-----------|-----------|
| 5  | 6 | 0 | 2.695184   | 2.443861  | -3.203925 |
| 6  | 6 | 0 | 2.505692   | 4.80816   | -1.723111 |
| 7  | 6 | 0 | 0.626249   | 5.397079  | -0.121379 |
| 8  | 6 | 0 | -1.664434  | 3.843222  | 0.448747  |
| 9  | 6 | 0 | -4.163016  | 5.213388  | -0.218601 |
| 10 | 6 | 0 | -6.402112  | 3.641588  | 0.613498  |
| 11 | 6 | 0 | -1.01614   | -3.938902 | -1.260947 |
| 12 | 6 | 0 | 1.502682   | -3.76035  | 0.208823  |
| 13 | 6 | 0 | 2.805327   | -1.092604 | 0.176032  |
| 14 | 6 | 0 | 3.542976   | -5.451019 | -1.06132  |
| 15 | 6 | 0 | 6.134454   | -4.206306 | -0.500029 |
| 16 | 6 | 0 | 5.557784   | -1.771741 | 1.016465  |
| 17 | 6 | 0 | 7.555262   | 0.324342  | 0.817642  |
| 18 | 6 | 0 | 6.957931   | 2.506365  | 2.633033  |
| 19 | 6 | 0 | 10.213758  | -0.703329 | 1.363539  |
| 20 | 6 | 0 | 1.078978   | -4.677511 | 2.941553  |
| 21 | 6 | 0 | 4.600463   | 6.673941  | -2.273266 |
| 22 | 6 | 0 | -6.560417  | -5.506557 | -2.214347 |
| 23 | 6 | 0 | -7.289898  | 4.087325  | 3.282795  |
| 24 | 1 | 0 | 1.92364    | 0.205417  | 1.518572  |
| 25 | 6 | 0 | 2.813325   | 0.025993  | -2.445479 |
| 26 | 1 | 0 | -6.466152  | 1.662443  | -2.778033 |
| 27 | 1 | 0 | -10.086057 | -0.947478 | -1.899684 |
| 28 | 1 | 0 | -10.683811 | 0.536384  | 1.00494   |
| 29 | 1 | 0 | -7.061716  | -1.609059 | 2.999022  |
| 30 | 1 | 0 | -9.241283  | -3.811388 | 1.759499  |
| 31 | 1 | 0 | -2.948499  | -1.491642 | 1.529561  |
| 32 | 1 | 0 | 2.948665   | 2.769416  | -5.227748 |
| 33 | 1 | 0 | 0.704718   | 7.239421  | 0.802495  |
| 34 | 1 | 0 | -1.609698  | 2.068006  | -0.599859 |
| 35 | 1 | 0 | -1.697187  | 3.343796  | 2.468521  |
| 36 | 1 | 0 | -4.206072  | 5.526292  | -2.265636 |
| 37 | 1 | 0 | -4.196369  | 7.083821  | 0.681992  |
| 38 | 1 | 0 | -0.794052  | -2.969554 | -3.084414 |
| 39 | 1 | 0 | -1.316225  | -5.938996 | -1.722177 |
| 40 | 1 | 0 | 3.420245   | -7.392974 | -0.354267 |
| 41 | 1 | 0 | 3.212336   | -5.55603  | -3.104045 |
| 42 | 1 | 0 | 7.102576   | -3.723267 | -2.267314 |
| 43 | 1 | 0 | 7.402987   | -5.464455 | 0.539806  |
| 44 | 1 | 0 | 5.449508   | -2.273103 | 3.026163  |
| 45 | 1 | 0 | 7.532254   | 1.056485  | -1.124569 |
| 46 | 1 | 0 | 6.999618   | 1.841983  | 4.598614  |
| 47 | 1 | 0 | 8.362487   | 4.019617  | 2.459335  |

|    |   |   |           |           |           |
|----|---|---|-----------|-----------|-----------|
| 48 | 1 | 0 | 5.095469  | 3.32406   | 2.276055  |
| 49 | 1 | 0 | 11.618509 | 0.816747  | 1.274746  |
| 50 | 1 | 0 | 10.777265 | -2.162771 | 0.010038  |
| 51 | 1 | 0 | 10.30867  | -1.531051 | 3.264058  |
| 52 | 1 | 0 | -0.007721 | -6.441118 | 2.931416  |
| 53 | 1 | 0 | 2.85745   | -5.055431 | 3.924367  |
| 54 | 1 | 0 | 0.018608  | -3.299407 | 4.062387  |
| 55 | 1 | 0 | 4.669736  | 7.129203  | -4.297783 |
| 56 | 1 | 0 | 4.342415  | 8.437765  | -1.224825 |
| 57 | 1 | 0 | 6.451916  | 5.885141  | -1.777018 |
| 58 | 1 | 0 | -7.657146 | -7.035649 | -1.337201 |
| 59 | 1 | 0 | -7.811418 | -4.618655 | -3.613887 |
| 60 | 1 | 0 | -4.98597  | -6.353215 | -3.246156 |
| 61 | 1 | 0 | -7.928647 | 6.047873  | 3.522124  |
| 62 | 1 | 0 | -8.837687 | 2.839822  | 3.839767  |
| 63 | 1 | 0 | -5.739297 | 3.808382  | 4.635328  |
| 64 | 1 | 0 | 3.101287  | -1.346907 | -3.95247  |

| 14R,15R,18S-1000005_en_ |               | Standard Orientation (A.U.) |           |           |           |
|-------------------------|---------------|-----------------------------|-----------|-----------|-----------|
| Center number           | Atomic number | Atomic Type                 | X         | Y         | Z         |
| 0                       | 6             | 0                           | -4.403809 | -0.956041 | -2.935709 |
| 1                       | 6             | 0                           | -6.616618 | 0.818252  | -3.028677 |
| 2                       | 6             | 0                           | -6.815815 | 2.403673  | -0.559919 |
| 3                       | 6             | 0                           | -4.530364 | 4.068599  | -0.068982 |
| 4                       | 6             | 0                           | -2.58408  | 3.13775   | 1.261165  |
| 5                       | 6             | 0                           | 1.508314  | -1.692434 | 4.482045  |
| 6                       | 6             | 0                           | -1.222093 | -2.287893 | 4.303821  |
| 7                       | 6             | 0                           | -2.398773 | -3.842693 | 2.680996  |
| 8                       | 6             | 0                           | -1.322624 | -5.56023  | 0.695635  |
| 9                       | 6             | 0                           | -1.849143 | -4.747955 | -2.088144 |
| 10                      | 6             | 0                           | -4.367972 | -3.443    | -2.450633 |
| 11                      | 6             | 0                           | -0.062038 | 4.311905  | 1.845252  |
| 12                      | 6             | 0                           | 2.097711  | 3.408113  | 0.091859  |
| 13                      | 6             | 0                           | 2.709443  | 0.49828   | 0.241711  |
| 14                      | 6             | 0                           | 4.666693  | 4.588125  | 0.820994  |
| 15                      | 6             | 0                           | 6.698339  | 2.79179   | -0.282973 |
| 16                      | 6             | 0                           | 5.286254  | 0.378361  | -1.19775  |
| 17                      | 6             | 0                           | 6.857188  | -2.059118 | -0.983759 |
| 18                      | 6             | 0                           | 5.402949  | -4.349606 | -1.989329 |
| 19                      | 6             | 0                           | 9.374452  | -1.786878 | -2.402081 |
| 20                      | 6             | 0                           | 1.442516  | 4.17756   | -2.641032 |
| 21                      | 6             | 0                           | -2.730089 | -1.001285 | 6.376839  |

|    |   |   |           |           |           |
|----|---|---|-----------|-----------|-----------|
| 22 | 6 | 0 | -4.612819 | 6.653063  | -1.258718 |
| 23 | 6 | 0 | -6.678888 | -5.073895 | -2.12714  |
| 24 | 1 | 0 | 1.229026  | -0.581841 | -0.702626 |
| 25 | 6 | 0 | 3.06739   | -0.456412 | 2.906151  |
| 26 | 1 | 0 | -2.57722  | -0.035252 | -3.121726 |
| 27 | 1 | 0 | -8.400158 | -0.196813 | -3.299325 |
| 28 | 1 | 0 | -6.416685 | 2.103618  | -4.647404 |
| 29 | 1 | 0 | -8.531845 | 3.567678  | -0.66145  |
| 30 | 1 | 0 | -7.067548 | 1.081492  | 1.013933  |
| 31 | 1 | 0 | -2.787137 | 1.209036  | 1.922094  |
| 32 | 1 | 0 | 2.282517  | -2.080355 | 6.35783   |
| 33 | 1 | 0 | -4.44315  | -3.971034 | 2.892557  |
| 34 | 1 | 0 | 0.715245  | -5.776401 | 0.963368  |
| 35 | 1 | 0 | -2.150569 | -7.440691 | 0.998723  |
| 36 | 1 | 0 | -1.715522 | -6.438735 | -3.287862 |
| 37 | 1 | 0 | -0.347245 | -3.470772 | -2.706813 |
| 38 | 1 | 0 | 0.454584  | 3.854745  | 3.80048   |
| 39 | 1 | 0 | -0.147159 | 6.379397  | 1.722515  |
| 40 | 1 | 0 | 4.842176  | 6.526317  | 0.114211  |
| 41 | 1 | 0 | 4.827699  | 4.685866  | 2.884103  |
| 42 | 1 | 0 | 8.100607  | 2.30151   | 1.161274  |
| 43 | 1 | 0 | 7.747886  | 3.666831  | -1.834794 |
| 44 | 1 | 0 | 4.860326  | 0.591941  | -3.214223 |
| 45 | 1 | 0 | 7.287468  | -2.39884  | 1.019416  |
| 46 | 1 | 0 | 3.676381  | -4.673703 | -0.909983 |
| 47 | 1 | 0 | 4.871624  | -4.072191 | -3.975482 |
| 48 | 1 | 0 | 6.552064  | -6.069757 | -1.880334 |
| 49 | 1 | 0 | 9.042506  | -1.393941 | -4.412223 |
| 50 | 1 | 0 | 10.478802 | -3.535006 | -2.279926 |
| 51 | 1 | 0 | 10.535252 | -0.252308 | -1.642767 |
| 52 | 1 | 0 | -0.206463 | 3.152553  | -3.345692 |
| 53 | 1 | 0 | 0.992157  | 6.197762  | -2.702272 |
| 54 | 1 | 0 | 3.006675  | 3.864778  | -3.952202 |
| 55 | 1 | 0 | -4.737933 | -1.484325 | 6.265476  |
| 56 | 1 | 0 | -2.032113 | -1.573081 | 8.246648  |
| 57 | 1 | 0 | -2.553172 | 1.060779  | 6.276304  |
| 58 | 1 | 0 | -6.290248 | 7.701904  | -0.63018  |
| 59 | 1 | 0 | -2.945538 | 7.78912   | -0.822918 |
| 60 | 1 | 0 | -4.747583 | 6.511498  | -3.32666  |
| 61 | 1 | 0 | -8.441258 | -4.028901 | -2.381412 |
| 62 | 1 | 0 | -6.660535 | -6.637231 | -3.493284 |
| 63 | 1 | 0 | -6.73111  | -5.946128 | -0.245023 |
| 64 | 1 | 0 | 4.930451  | -0.057701 | 3.687899  |



| 14R,15R,18S-1000006_en_ |               | Standard Orientation (A.U.) |           |           |           |
|-------------------------|---------------|-----------------------------|-----------|-----------|-----------|
| Center number           | Atomic number | Atomic Type                 | X         | Y         | Z         |
| 0                       | 6             | 0                           | -4.9448   | -2.588578 | -2.464622 |
| 1                       | 6             | 0                           | -6.673106 | -0.355774 | -2.770002 |
| 2                       | 6             | 0                           | -7.33969  | 0.91565   | -0.199922 |
| 3                       | 6             | 0                           | -5.459808 | 2.937154  | 0.561775  |
| 4                       | 6             | 0                           | -3.370832 | 2.326036  | 1.858456  |
| 5                       | 6             | 0                           | 1.350315  | -1.966023 | 4.404243  |
| 6                       | 6             | 0                           | -0.878377 | -3.567066 | 3.878846  |
| 7                       | 6             | 0                           | -1.290112 | -5.04444  | 1.856699  |
| 8                       | 6             | 0                           | 0.296765  | -5.465893 | -0.452332 |
| 9                       | 6             | 0                           | -1.331264 | -5.532887 | -2.886721 |
| 10                      | 6             | 0                           | -2.687853 | -3.078341 | -3.50949  |
| 11                      | 6             | 0                           | -1.15552  | 3.990509  | 2.51266   |
| 12                      | 6             | 0                           | 1.044541  | 3.674289  | 0.60902   |
| 13                      | 6             | 0                           | 2.038392  | 0.877856  | 0.471927  |
| 14                      | 6             | 0                           | 3.466892  | 5.135846  | 1.346006  |
| 15                      | 6             | 0                           | 5.676914  | 3.710223  | 0.034941  |
| 16                      | 6             | 0                           | 4.528218  | 1.23122   | -1.054465 |
| 17                      | 6             | 0                           | 6.369389  | -1.014062 | -1.388666 |
| 18                      | 6             | 0                           | 8.33879   | -0.343852 | -3.418023 |
| 19                      | 6             | 0                           | 7.717799  | -1.974506 | 0.994044  |
| 20                      | 6             | 0                           | 0.138275  | 4.60474   | -1.997452 |
| 21                      | 6             | 0                           | -2.754115 | -3.579078 | 6.044763  |
| 22                      | 6             | 0                           | -6.088135 | 5.552947  | -0.375215 |
| 23                      | 6             | 0                           | -1.343697 | -1.38439  | -5.361007 |
| 24                      | 1             | 0                           | 0.671509  | -0.298169 | -0.524094 |
| 25                      | 6             | 0                           | 2.527228  | -0.155217 | 3.07255   |
| 26                      | 1             | 0                           | -5.710566 | -4.029668 | -1.203385 |
| 27                      | 1             | 0                           | -8.439289 | -1.027937 | -3.637109 |
| 28                      | 1             | 0                           | -5.893706 | 1.056848  | -4.066214 |
| 29                      | 1             | 0                           | -9.232459 | 1.751366  | -0.340873 |
| 30                      | 1             | 0                           | -7.446155 | -0.55628  | 1.254933  |
| 31                      | 1             | 0                           | -3.142235 | 0.347792  | 2.360842  |
| 32                      | 1             | 0                           | 2.054088  | -2.231727 | 6.327883  |
| 33                      | 1             | 0                           | -3.01444  | -6.174745 | 1.894241  |
| 34                      | 1             | 0                           | 1.801275  | -4.065094 | -0.603346 |
| 35                      | 1             | 0                           | 1.23839   | -7.315286 | -0.293433 |
| 36                      | 1             | 0                           | -2.725528 | -7.052633 | -2.669054 |
| 37                      | 1             | 0                           | -0.114824 | -6.079678 | -4.475038 |
| 38                      | 1             | 0                           | -0.472146 | 3.503644  | 4.406482  |

|    |   |   |           |           |           |
|----|---|---|-----------|-----------|-----------|
| 39 | 1 | 0 | -1.694524 | 5.990174  | 2.566815  |
| 40 | 1 | 0 | 3.355852  | 7.122037  | 0.773909  |
| 41 | 1 | 0 | 3.708864  | 5.122881  | 3.402874  |
| 42 | 1 | 0 | 7.185109  | 3.300788  | 1.390422  |
| 43 | 1 | 0 | 6.537577  | 4.841709  | -1.466533 |
| 44 | 1 | 0 | 3.911517  | 1.647408  | -2.98621  |
| 45 | 1 | 0 | 5.241214  | -2.592863 | -2.134451 |
| 46 | 1 | 0 | 9.528927  | -1.978721 | -3.86551  |
| 47 | 1 | 0 | 7.435655  | 0.288412  | -5.172759 |
| 48 | 1 | 0 | 9.588599  | 1.17718   | -2.769267 |
| 49 | 1 | 0 | 8.811664  | -0.472095 | 1.910346  |
| 50 | 1 | 0 | 9.051135  | -3.476365 | 0.484006  |
| 51 | 1 | 0 | 6.395991  | -2.740835 | 2.378201  |
| 52 | 1 | 0 | -1.396583 | 3.430997  | -2.719949 |
| 53 | 1 | 0 | -0.572951 | 6.542371  | -1.82808  |
| 54 | 1 | 0 | 1.649445  | 4.639008  | -3.4047   |
| 55 | 1 | 0 | -1.841521 | -4.148741 | 7.820043  |
| 56 | 1 | 0 | -3.533092 | -1.682062 | 6.358234  |
| 57 | 1 | 0 | -4.327832 | -4.87221  | 5.6871    |
| 58 | 1 | 0 | -4.711734 | 6.975056  | 0.206383  |
| 59 | 1 | 0 | -6.188414 | 5.591022  | -2.449608 |
| 60 | 1 | 0 | -7.955021 | 6.144221  | 0.313241  |
| 61 | 1 | 0 | 0.603567  | -1.010995 | -4.754061 |
| 62 | 1 | 0 | -1.213966 | -2.308047 | -7.216589 |
| 63 | 1 | 0 | -2.280298 | 0.434716  | -5.623064 |
| 64 | 1 | 0 | 4.079638  | 0.768351  | 4.059308  |

| 14R,15R,18S-1000007_en_ |               | Standard Orientation (A.U.) |           |           |           |
|-------------------------|---------------|-----------------------------|-----------|-----------|-----------|
| Center number           | Atomic number | Atomic Type                 | X         | Y         | Z         |
| 0                       | 6             | 0                           | -4.945081 | -2.587945 | -2.464638 |
| 1                       | 6             | 0                           | -6.673302 | -0.355066 | -2.769851 |
| 2                       | 6             | 0                           | -7.339672 | 0.916401  | -0.199737 |
| 3                       | 6             | 0                           | -5.459396 | 2.937544  | 0.562006  |
| 4                       | 6             | 0                           | -3.370808 | 2.326031  | 1.859161  |
| 5                       | 6             | 0                           | 1.350288  | -1.96653  | 4.404083  |
| 6                       | 6             | 0                           | -0.878654 | -3.567273 | 3.878691  |
| 7                       | 6             | 0                           | -1.290492 | -5.044462 | 1.856399  |
| 8                       | 6             | 0                           | 0.29626   | -5.465824 | -0.452747 |
| 9                       | 6             | 0                           | -1.331855 | -5.532633 | -2.88711  |
| 10                      | 6             | 0                           | -2.688289 | -3.077946 | -3.50977  |
| 11                      | 6             | 0                           | -1.15514  | 3.990053  | 2.513339  |
| 12                      | 6             | 0                           | 1.044699  | 3.674067  | 0.609451  |

|    |   |   |           |           |           |
|----|---|---|-----------|-----------|-----------|
| 13 | 6 | 0 | 2.038497  | 0.877632  | 0.471919  |
| 14 | 6 | 0 | 3.467143  | 5.135436  | 1.346622  |
| 15 | 6 | 0 | 5.677125  | 3.709919  | 0.035352  |
| 16 | 6 | 0 | 4.528315  | 1.231207  | -1.054437 |
| 17 | 6 | 0 | 6.36935   | -1.01414  | -1.389189 |
| 18 | 6 | 0 | 8.339167  | -0.343185 | -3.417848 |
| 19 | 6 | 0 | 7.717341  | -1.975664 | 0.993343  |
| 20 | 6 | 0 | 0.138425  | 4.604815  | -1.996939 |
| 21 | 6 | 0 | -2.754242 | -3.579464 | 6.044685  |
| 22 | 6 | 0 | -6.086875 | 5.55335   | -0.375584 |
| 23 | 6 | 0 | -1.344249 | -1.38408  | -5.361435 |
| 24 | 1 | 0 | 0.67161   | -0.298209 | -0.52431  |
| 25 | 6 | 0 | 2.527383  | -0.155848 | 3.072387  |
| 26 | 1 | 0 | -5.710812 | -4.028969 | -1.203299 |
| 27 | 1 | 0 | -8.439574 | -1.027191 | -3.636858 |
| 28 | 1 | 0 | -5.894015 | 1.057522  | -4.066184 |
| 29 | 1 | 0 | -9.232314 | 1.752409  | -0.340643 |
| 30 | 1 | 0 | -7.446353 | -0.555591 | 1.255063  |
| 31 | 1 | 0 | -3.143001 | 0.347843  | 2.362096  |
| 32 | 1 | 0 | 2.054241  | -2.232516 | 6.32762   |
| 33 | 1 | 0 | -3.014921 | -6.174622 | 1.893873  |
| 34 | 1 | 0 | 1.800817  | -4.065077 | -0.603768 |
| 35 | 1 | 0 | 1.237856  | -7.315241 | -0.29394  |
| 36 | 1 | 0 | -2.726215 | -7.052292 | -2.669487 |
| 37 | 1 | 0 | -0.115459 | -6.079419 | -4.475463 |
| 38 | 1 | 0 | -0.471516 | 3.502634  | 4.406929  |
| 39 | 1 | 0 | -1.693901 | 5.98978   | 2.568087  |
| 40 | 1 | 0 | 3.356207  | 7.121725  | 0.774852  |
| 41 | 1 | 0 | 3.709078  | 5.122079  | 3.403492  |
| 42 | 1 | 0 | 7.185319  | 3.300199  | 1.390767  |
| 43 | 1 | 0 | 6.537835  | 4.841632  | -1.465933 |
| 44 | 1 | 0 | 3.911629  | 1.647708  | -2.986129 |
| 45 | 1 | 0 | 5.241141  | -2.59251  | -2.135896 |
| 46 | 1 | 0 | 9.529705  | -1.97774  | -3.865441 |
| 47 | 1 | 0 | 7.436433  | 0.289358  | -5.172703 |
| 48 | 1 | 0 | 9.588594  | 1.177897  | -2.768444 |
| 49 | 1 | 0 | 9.050507  | -3.477527 | 0.482866  |
| 50 | 1 | 0 | 6.395331  | -2.742388 | 2.377076  |
| 51 | 1 | 0 | 8.811342  | -0.473727 | 1.910276  |
| 52 | 1 | 0 | 1.649723  | 4.639545  | -3.404051 |
| 53 | 1 | 0 | -1.396141 | 3.430904  | -2.719792 |
| 54 | 1 | 0 | -0.573136 | 6.542283  | -1.827293 |
| 55 | 1 | 0 | -1.841663 | -4.150215 | 7.819644  |

|    |   |   |           |           |           |
|----|---|---|-----------|-----------|-----------|
| 56 | 1 | 0 | -3.532571 | -1.682348 | 6.359086  |
| 57 | 1 | 0 | -4.328413 | -4.871945 | 5.68664   |
| 58 | 1 | 0 | -6.184182 | 5.591863  | -2.45011  |
| 59 | 1 | 0 | -7.954828 | 6.144098  | 0.310369  |
| 60 | 1 | 0 | -4.711577 | 6.975652  | 0.208206  |
| 61 | 1 | 0 | 0.603047  | -1.010563 | -4.754667 |
| 62 | 1 | 0 | -1.214585 | -2.307812 | -7.216981 |
| 63 | 1 | 0 | -2.280925 | 0.434994  | -5.623509 |
| 64 | 1 | 0 | 4.080059  | 0.767409  | 4.059032  |

| 14R,15R,18S-1000009_en_ |               | Standard Orientation (A.U.) |           |           |           |
|-------------------------|---------------|-----------------------------|-----------|-----------|-----------|
| Center number           | Atomic number | Atomic Type                 | X         | Y         | Z         |
| 0                       | 6             | 0                           | -4.900689 | -0.880049 | -2.002065 |
| 1                       | 6             | 0                           | -6.45918  | 1.458573  | -2.413305 |
| 2                       | 6             | 0                           | -6.379843 | 3.202628  | -0.046181 |
| 3                       | 6             | 0                           | -3.891582 | 4.598774  | 0.208939  |
| 4                       | 6             | 0                           | -1.967815 | 3.567019  | 1.499376  |
| 5                       | 6             | 0                           | 1.673161  | -1.624369 | 4.42391   |
| 6                       | 6             | 0                           | -1.049626 | -2.269775 | 4.362567  |
| 7                       | 6             | 0                           | -2.387944 | -3.568353 | 2.635809  |
| 8                       | 6             | 0                           | -1.601097 | -4.803043 | 0.193778  |
| 9                       | 6             | 0                           | -3.891266 | -5.472282 | -1.460037 |
| 10                      | 6             | 0                           | -5.612379 | -3.302138 | -2.212141 |
| 11                      | 6             | 0                           | 0.702034  | 4.512354  | 1.739301  |
| 12                      | 6             | 0                           | 2.571082  | 3.309155  | -0.166891 |
| 13                      | 6             | 0                           | 2.91955   | 0.372361  | 0.112501  |
| 14                      | 6             | 0                           | 5.286946  | 4.291629  | 0.243095  |
| 15                      | 6             | 0                           | 7.050038  | 2.26712   | -0.914166 |
| 16                      | 6             | 0                           | 5.391362  | -0.10746  | -1.437996 |
| 17                      | 6             | 0                           | 6.806239  | -2.612681 | -1.001824 |
| 18                      | 6             | 0                           | 5.103853  | -4.921351 | -1.387168 |
| 19                      | 6             | 0                           | 9.121177  | -2.778481 | -2.744856 |
| 20                      | 6             | 0                           | 1.707913  | 3.931287  | -2.876147 |
| 21                      | 6             | 0                           | -2.38248  | -1.366453 | 6.739555  |
| 22                      | 6             | 0                           | -3.769577 | 7.077975  | -1.188594 |
| 23                      | 6             | 0                           | -8.157544 | -4.158811 | -3.169041 |
| 24                      | 1             | 0                           | 1.304176  | -0.582427 | -0.739217 |
| 25                      | 6             | 0                           | 3.258432  | -0.484671 | 2.798699  |
| 26                      | 1             | 0                           | -3.005785 | -0.489041 | -1.319148 |
| 27                      | 1             | 0                           | -8.427708 | 0.984287  | -2.832715 |
| 28                      | 1             | 0                           | -5.749816 | 2.529466  | -4.048594 |
| 29                      | 1             | 0                           | -7.936366 | 4.568314  | -0.178555 |

|    |   |   |           |           |           |
|----|---|---|-----------|-----------|-----------|
| 30 | 1 | 0 | -6.733351 | 2.037878  | 1.62921   |
| 31 | 1 | 0 | -2.319089 | 1.75422   | 2.396451  |
| 32 | 1 | 0 | 2.47415   | -1.954531 | 6.29893   |
| 33 | 1 | 0 | -4.382191 | -3.830883 | 3.079678  |
| 34 | 1 | 0 | -0.287409 | -3.625318 | -0.875508 |
| 35 | 1 | 0 | -0.564248 | -6.557874 | 0.595361  |
| 36 | 1 | 0 | -5.047647 | -6.866879 | -0.436396 |
| 37 | 1 | 0 | -3.240437 | -6.464685 | -3.167805 |
| 38 | 1 | 0 | 1.386317  | 4.119367  | 3.655186  |
| 39 | 1 | 0 | 0.793914  | 6.567811  | 1.486747  |
| 40 | 1 | 0 | 5.554517  | 6.165098  | -0.59743  |
| 41 | 1 | 0 | 5.650444  | 4.491698  | 2.273227  |
| 42 | 1 | 0 | 8.585834  | 1.802557  | 0.396211  |
| 43 | 1 | 0 | 7.952234  | 2.933268  | -2.65155  |
| 44 | 1 | 0 | 4.846007  | -0.10364  | -3.437847 |
| 45 | 1 | 0 | 7.48708   | -2.64596  | 0.960519  |
| 46 | 1 | 0 | 4.219932  | -4.887966 | -3.26431  |
| 47 | 1 | 0 | 6.197402  | -6.675234 | -1.241976 |
| 48 | 1 | 0 | 3.607225  | -4.991186 | 0.029834  |
| 49 | 1 | 0 | 10.157179 | -4.54362  | -2.426567 |
| 50 | 1 | 0 | 10.437648 | -1.210646 | -2.444706 |
| 51 | 1 | 0 | 8.539676  | -2.74291  | -4.736392 |
| 52 | 1 | 0 | 1.458011  | 5.975316  | -3.089441 |
| 53 | 1 | 0 | 3.087512  | 3.334804  | -4.293704 |
| 54 | 1 | 0 | -0.098315 | 3.025245  | -3.31334  |
| 55 | 1 | 0 | -1.478405 | -2.137108 | 8.441755  |
| 56 | 1 | 0 | -2.29032  | 0.700127  | 6.899173  |
| 57 | 1 | 0 | -4.372769 | -1.925244 | 6.758659  |
| 58 | 1 | 0 | -4.074981 | 6.798637  | -3.223412 |
| 59 | 1 | 0 | -5.274019 | 8.351511  | -0.537957 |
| 60 | 1 | 0 | -1.96477  | 8.050652  | -0.959549 |
| 61 | 1 | 0 | -7.928097 | -5.52292  | -4.717698 |
| 62 | 1 | 0 | -9.21675  | -5.141655 | -1.677207 |
| 63 | 1 | 0 | -9.328444 | -2.611368 | -3.870658 |
| 64 | 1 | 0 | 5.137078  | -0.112912 | 3.55803   |

| 14R,15R,18S-1000010_en_ |               | Standard Orientation (A.U.) |           |           |           |
|-------------------------|---------------|-----------------------------|-----------|-----------|-----------|
| Center number           | Atomic number | Atomic Type                 | X         | Y         | Z         |
| 0                       | 6             | 0                           | -5.605037 | -2.396271 | -2.24287  |
| 1                       | 6             | 0                           | -7.01095  | 0.01969   | -2.733173 |
| 2                       | 6             | 0                           | -7.419754 | 1.575138  | -0.271904 |
| 3                       | 6             | 0                           | -5.237269 | 3.328402  | 0.342214  |

|    |   |   |           |           |           |
|----|---|---|-----------|-----------|-----------|
| 4  | 6 | 0 | -3.194122 | 2.471426  | 1.573527  |
| 5  | 6 | 0 | 1.593324  | -1.908343 | 4.466029  |
| 6  | 6 | 0 | -0.930017 | -3.085321 | 4.166528  |
| 7  | 6 | 0 | -1.780363 | -4.581029 | 2.300071  |
| 8  | 6 | 0 | -0.488411 | -5.505671 | -0.048835 |
| 9  | 6 | 0 | -2.340014 | -5.738809 | -2.299841 |
| 10 | 6 | 0 | -3.404974 | -3.228966 | -3.182738 |
| 11 | 6 | 0 | -0.823204 | 3.902539  | 2.229888  |
| 12 | 6 | 0 | 1.410944  | 3.459279  | 0.396597  |
| 13 | 6 | 0 | 2.498563  | 0.691518  | 0.40799   |
| 14 | 6 | 0 | 3.756584  | 5.01765   | 1.143425  |
| 15 | 6 | 0 | 6.005977  | 3.705708  | -0.180566 |
| 16 | 6 | 0 | 5.064844  | 1.038956  | -1.019606 |
| 17 | 6 | 0 | 7.117911  | -1.00649  | -0.725337 |
| 18 | 6 | 0 | 6.150452  | -3.670985 | -1.307666 |
| 19 | 6 | 0 | 9.390852  | -0.380968 | -2.420261 |
| 20 | 6 | 0 | 0.580728  | 4.21213   | -2.289293 |
| 21 | 6 | 0 | -2.621277 | -2.559031 | 6.421247  |
| 22 | 6 | 0 | -5.558666 | 5.987737  | -0.628513 |
| 23 | 6 | 0 | -1.832151 | -1.852758 | -5.115293 |
| 24 | 1 | 0 | 1.204278  | -0.54809  | -0.610864 |
| 25 | 6 | 0 | 2.953401  | -0.321489 | 3.025946  |
| 26 | 1 | 0 | -6.559105 | -3.628247 | -0.890273 |
| 27 | 1 | 0 | -8.875313 | -0.459657 | -3.517676 |
| 28 | 1 | 0 | -6.064261 | 1.193658  | -4.150015 |
| 29 | 1 | 0 | -9.155759 | 2.691577  | -0.470196 |
| 30 | 1 | 0 | -7.745481 | 0.254536  | 1.29204   |
| 31 | 1 | 0 | -3.184536 | 0.486946  | 2.097311  |
| 32 | 1 | 0 | 2.370419  | -2.24892  | 6.349519  |
| 33 | 1 | 0 | -3.693996 | -5.31098  | 2.535934  |
| 34 | 1 | 0 | 1.09951   | -4.300317 | -0.559422 |
| 35 | 1 | 0 | 0.314608  | -7.392019 | 0.310713  |
| 36 | 1 | 0 | -3.890792 | -6.995025 | -1.737226 |
| 37 | 1 | 0 | -1.356187 | -6.67704  | -3.867248 |
| 38 | 1 | 0 | -0.216722 | 3.362352  | 4.136205  |
| 39 | 1 | 0 | -1.186455 | 5.942089  | 2.284399  |
| 40 | 1 | 0 | 3.557067  | 7.007787  | 0.607703  |
| 41 | 1 | 0 | 3.996484  | 4.970435  | 3.201218  |
| 42 | 1 | 0 | 7.619424  | 3.532845  | 1.106841  |
| 43 | 1 | 0 | 6.674648  | 4.794519  | -1.806761 |
| 44 | 1 | 0 | 4.612397  | 1.09892   | -3.042158 |
| 45 | 1 | 0 | 7.777793  | -0.9904   | 1.244461  |
| 46 | 1 | 0 | 5.22649   | -3.742616 | -3.164526 |

|    |   |   |           |           |           |
|----|---|---|-----------|-----------|-----------|
| 47 | 1 | 0 | 7.712419  | -5.031953 | -1.336189 |
| 48 | 1 | 0 | 4.797902  | -4.299417 | 0.117253  |
| 49 | 1 | 0 | 8.833369  | -0.385477 | -4.418996 |
| 50 | 1 | 0 | 10.893704 | -1.78668  | -2.185325 |
| 51 | 1 | 0 | 10.191235 | 1.478492  | -1.994731 |
| 52 | 1 | 0 | -0.97285  | 3.024359  | -2.946273 |
| 53 | 1 | 0 | -0.083975 | 6.173443  | -2.288995 |
| 54 | 1 | 0 | 2.120328  | 4.090554  | -3.661299 |
| 55 | 1 | 0 | -3.008641 | -0.528286 | 6.59338   |
| 56 | 1 | 0 | -4.43058  | -3.548126 | 6.265773  |
| 57 | 1 | 0 | -1.712096 | -3.147587 | 8.191817  |
| 58 | 1 | 0 | -5.773221 | 5.989815  | -2.694967 |
| 59 | 1 | 0 | -7.285626 | 6.845315  | 0.140596  |
| 60 | 1 | 0 | -3.971311 | 7.221945  | -0.168691 |
| 61 | 1 | 0 | -2.569059 | 0.019313  | -5.572316 |
| 62 | 1 | 0 | 0.122718  | -1.618656 | -4.464629 |
| 63 | 1 | 0 | -1.737894 | -2.948379 | -6.87701  |
| 64 | 1 | 0 | 4.68484   | 0.364717  | 3.905226  |

| 14R,15R,18S-1000011_en_ |               | Standard Orientation (A.U.) |            |           |           |
|-------------------------|---------------|-----------------------------|------------|-----------|-----------|
| Center number           | Atomic number | Atomic Type                 | X          | Y         | Z         |
| 0                       | 6             | 0                           | -6.833866  | 2.503405  | 0.074714  |
| 1                       | 6             | 0                           | -8.536264  | 0.38192   | 0.914206  |
| 2                       | 6             | 0                           | -8.565773  | -1.816961 | -0.976961 |
| 3                       | 6             | 0                           | -6.123229  | -3.228201 | -1.486048 |
| 4                       | 6             | 0                           | -3.872357  | -2.663487 | -0.461421 |
| 5                       | 6             | 0                           | 2.756424   | 1.899397  | -3.473109 |
| 6                       | 6             | 0                           | 2.899004   | 4.442301  | -2.315947 |
| 7                       | 6             | 0                           | 1.24548    | 5.429231  | -0.657432 |
| 8                       | 6             | 0                           | -1.058198  | 4.151421  | 0.357191  |
| 9                       | 6             | 0                           | -3.503789  | 5.744318  | 0.356257  |
| 10                      | 6             | 0                           | -5.5653    | 4.140547  | 1.527298  |
| 11                      | 6             | 0                           | -1.4532    | -4.10233  | -0.990283 |
| 12                      | 6             | 0                           | 0.833267   | -3.621945 | 0.763471  |
| 13                      | 6             | 0                           | 2.344075   | -1.104446 | 0.332589  |
| 14                      | 6             | 0                           | 2.877835   | -5.652872 | 0.232935  |
| 15                      | 6             | 0                           | 5.433171   | -4.543942 | 1.115172  |
| 16                      | 6             | 0                           | 4.947936   | -1.695852 | 1.614464  |
| 17                      | 6             | 0                           | 7.14409    | 0.149878  | 1.044855  |
| 18                      | 6             | 0                           | 8.970756   | 0.263131  | 3.299482  |
| 19                      | 6             | 0                           | 8.641786   | -0.412895 | -1.377013 |
| 20                      | 6             | 0                           | -0.029453  | -3.81415  | 3.537395  |
| 21                      | 6             | 0                           | 5.10283    | 5.997691  | -3.269248 |
| 22                      | 6             | 0                           | -6.481229  | -5.378918 | -3.330992 |
| 23                      | 6             | 0                           | -5.798181  | 4.286333  | 4.360564  |
| 24                      | 1             | 0                           | 1.474616   | 0.447009  | 1.366925  |
| 25                      | 6             | 0                           | 2.560382   | -0.401305 | -2.412683 |
| 26                      | 1             | 0                           | -6.500316  | 2.592256  | -1.958805 |
| 27                      | 1             | 0                           | -10.495298 | 1.045796  | 1.126136  |
| 28                      | 1             | 0                           | -7.962396  | -0.319043 | 2.778536  |
| 29                      | 1             | 0                           | -9.986283  | -3.204348 | -0.357689 |
| 30                      | 1             | 0                           | -9.284457  | -1.104799 | -2.797998 |
| 31                      | 1             | 0                           | -3.747123  | -1.056104 | 0.806244  |
| 32                      | 1             | 0                           | 3.07189    | 1.923944  | -5.513622 |
| 33                      | 1             | 0                           | 1.590167   | 7.348118  | 0.013554  |
| 34                      | 1             | 0                           | -1.431535  | 2.431971  | -0.723007 |
| 35                      | 1             | 0                           | -0.708071  | 3.544979  | 2.318227  |
| 36                      | 1             | 0                           | -3.980939  | 6.259203  | -1.592428 |
| 37                      | 1             | 0                           | -3.216663  | 7.509658  | 1.409551  |
| 38                      | 1             | 0                           | -0.867384  | -3.775496 | -2.95318  |



|    |   |   |           |           |           |
|----|---|---|-----------|-----------|-----------|
| 39 | 1 | 0 | -1.84655  | -6.137414 | -0.871643 |
| 40 | 1 | 0 | 2.408282  | -7.444868 | 1.159222  |
| 41 | 1 | 0 | 2.940611  | -6.045957 | -1.80246  |
| 42 | 1 | 0 | 6.875106  | -4.828382 | -0.335664 |
| 43 | 1 | 0 | 6.130137  | -5.480059 | 2.823627  |
| 44 | 1 | 0 | 4.572489  | -1.487465 | 3.64098   |
| 45 | 1 | 0 | 6.289937  | 2.029601  | 0.836041  |
| 46 | 1 | 0 | 9.811485  | -1.597782 | 3.663479  |
| 47 | 1 | 0 | 10.522521 | 1.588643  | 2.940847  |
| 48 | 1 | 0 | 8.003468  | 0.868137  | 5.028869  |
| 49 | 1 | 0 | 9.910925  | 1.167922  | -1.807256 |
| 50 | 1 | 0 | 7.412843  | -0.695637 | -3.010376 |
| 51 | 1 | 0 | 9.825651  | -2.098589 | -1.1547   |
| 52 | 1 | 0 | 1.568108  | -3.888558 | 4.848234  |
| 53 | 1 | 0 | -1.214851 | -2.207063 | 4.080276  |
| 54 | 1 | 0 | -1.144343 | -5.537781 | 3.818417  |
| 55 | 1 | 0 | 5.088581  | 7.905431  | -2.47117  |
| 56 | 1 | 0 | 6.911475  | 5.103404  | -2.789368 |
| 57 | 1 | 0 | 5.054598  | 6.162863  | -5.338197 |
| 58 | 1 | 0 | -4.741018 | -6.413307 | -3.725028 |
| 59 | 1 | 0 | -7.886709 | -6.734446 | -2.623644 |
| 60 | 1 | 0 | -7.213935 | -4.669225 | -5.139904 |
| 61 | 1 | 0 | -6.519528 | 6.147882  | 4.93122   |
| 62 | 1 | 0 | -7.071669 | 2.857416  | 5.135568  |
| 63 | 1 | 0 | -3.950863 | 4.066899  | 5.282067  |
| 64 | 1 | 0 | 2.689855  | -1.988424 | -3.718632 |

| 14R,15R,18S-1000012_en_ |               | Standard Orientation (A.U.) |           |           |           |
|-------------------------|---------------|-----------------------------|-----------|-----------|-----------|
| Center number           | Atomic number | Atomic Type                 | X         | Y         | Z         |
| 0                       | 6             | 0                           | -6.894072 | 1.073344  | -0.936647 |
| 1                       | 6             | 0                           | -7.964478 | -1.532885 | -1.295646 |
| 2                       | 6             | 0                           | -6.388622 | -3.078713 | -3.185536 |
| 3                       | 6             | 0                           | -3.722497 | -3.839156 | -2.450444 |
| 4                       | 6             | 0                           | -2.752989 | -3.491105 | -0.133968 |
| 5                       | 6             | 0                           | 1.020998  | 2.407028  | -2.556243 |
| 6                       | 6             | 0                           | 1.097804  | 4.976915  | -1.433469 |
| 7                       | 6             | 0                           | -0.315458 | 5.742413  | 0.534569  |
| 8                       | 6             | 0                           | -2.232    | 4.156951  | 1.88738   |
| 9                       | 6             | 0                           | -5.007904 | 4.783472  | 1.11743   |
| 10                      | 6             | 0                           | -6.56379  | 2.387516  | 1.200687  |
| 11                      | 6             | 0                           | -0.25861  | -4.446356 | 0.852038  |
| 12                      | 6             | 0                           | 1.361352  | -2.670948 | 2.543952  |

|    |   |   |           |           |           |
|----|---|---|-----------|-----------|-----------|
| 13 | 6 | 0 | 2.520643  | -0.280827 | 1.139091  |
| 14 | 6 | 0 | 3.720216  | -4.221831 | 3.390719  |
| 15 | 6 | 0 | 5.801635  | -3.531527 | 1.514428  |
| 16 | 6 | 0 | 5.472316  | -0.662989 | 1.302048  |
| 17 | 6 | 0 | 7.133779  | 0.740889  | -0.638525 |
| 18 | 6 | 0 | 9.770478  | 1.240431  | 0.469354  |
| 19 | 6 | 0 | 7.389878  | -0.60507  | -3.194998 |
| 20 | 6 | 0 | -0.167565 | -1.857746 | 4.870187  |
| 21 | 6 | 0 | 2.797211  | 6.809376  | -2.819566 |
| 22 | 6 | 0 | -2.326684 | -5.085537 | -4.603749 |
| 23 | 6 | 0 | -7.373944 | 1.517929  | 3.786661  |
| 24 | 1 | 0 | 2.083992  | 1.410325  | 2.237216  |
| 25 | 6 | 0 | 1.583245  | 0.169547  | -1.501574 |
| 26 | 1 | 0 | -6.191204 | 1.931684  | -2.675998 |
| 27 | 1 | 0 | -9.894632 | -1.413898 | -2.060164 |
| 28 | 1 | 0 | -8.120817 | -2.550158 | 0.500284  |
| 29 | 1 | 0 | -7.430442 | -4.815782 | -3.663301 |
| 30 | 1 | 0 | -6.291695 | -2.013715 | -4.971718 |
| 31 | 1 | 0 | -3.931676 | -2.550237 | 1.257725  |
| 32 | 1 | 0 | 0.553093  | 2.39369   | -4.567397 |
| 33 | 1 | 0 | -0.164319 | 7.713425  | 1.119655  |
| 34 | 1 | 0 | -1.915154 | 2.18165   | 1.40747   |
| 35 | 1 | 0 | -2.006181 | 4.335334  | 3.941664  |
| 36 | 1 | 0 | -5.000612 | 5.530833  | -0.811746 |
| 37 | 1 | 0 | -5.789455 | 6.261991  | 2.345511  |
| 38 | 1 | 0 | 0.924382  | -5.160901 | -0.685816 |
| 39 | 1 | 0 | -0.670754 | -6.106746 | 2.038138  |
| 40 | 1 | 0 | 4.301911  | -3.634687 | 5.293749  |
| 41 | 1 | 0 | 3.316391  | -6.250542 | 3.479483  |
| 42 | 1 | 0 | 5.466645  | -4.451493 | -0.313554 |
| 43 | 1 | 0 | 7.691122  | -4.091657 | 2.149846  |
| 44 | 1 | 0 | 5.988712  | 0.103897  | 3.163755  |
| 45 | 1 | 0 | 6.240278  | 2.581021  | -0.982916 |
| 46 | 1 | 0 | 10.741439 | -0.537367 | 0.912756  |
| 47 | 1 | 0 | 10.957952 | 2.280022  | -0.872829 |
| 48 | 1 | 0 | 9.659132  | 2.350751  | 2.214788  |
| 49 | 1 | 0 | 8.464561  | 0.573146  | -4.517812 |
| 50 | 1 | 0 | 5.554779  | -0.997957 | -4.055059 |
| 51 | 1 | 0 | 8.407188  | -2.399112 | -2.996485 |
| 52 | 1 | 0 | -1.853488 | -0.77969  | 4.361833  |
| 53 | 1 | 0 | -0.777593 | -3.511885 | 5.962863  |
| 54 | 1 | 0 | 0.983455  | -0.667421 | 6.115337  |
| 55 | 1 | 0 | 4.777522  | 6.195259  | -2.756312 |

|    |   |   |           |           |           |
|----|---|---|-----------|-----------|-----------|
| 56 | 1 | 0 | 2.281858  | 6.918929  | -4.828152 |
| 57 | 1 | 0 | 2.678631  | 8.713485  | -2.020041 |
| 58 | 1 | 0 | -3.384333 | -6.722254 | -5.319826 |
| 59 | 1 | 0 | -2.13722  | -3.768093 | -6.198303 |
| 60 | 1 | 0 | -0.437483 | -5.73955  | -4.096765 |
| 61 | 1 | 0 | -8.663982 | 2.89918   | 4.645615  |
| 62 | 1 | 0 | -8.337031 | -0.308399 | 3.758749  |
| 63 | 1 | 0 | -5.74678  | 1.362735  | 5.06643   |
| 64 | 1 | 0 | 1.466155  | -1.472542 | -2.727766 |

**Table S7. Gibbs free energies<sup>a</sup> and equilibrium populations<sup>b</sup> of low-energy conformers of 14R,15R,18R-1.**

| Conformers          | $\Delta G$ (a.u.) | P(%) / 100 | G(a.u.)     |
|---------------------|-------------------|------------|-------------|
| 14R,15R,18R-1000001 | 0.00266           | 4.22       | -976.022152 |
| 14R,15R,18R-1000002 | 0.0               | 70.64      | -976.024812 |
| 14R,15R,18R-1000003 | 0.00133           | 17.2       | -976.023478 |
| 14R,15R,18R-1000004 | 0.00206           | 7.94       | -976.022748 |

<sup>a</sup>wB97M-V/def2-TZVP, in a.u.

<sup>b</sup>From  $\Delta G$  values at 298.15K.

**Table S8. Cartesian coordinates for the low-energy reoptimized random research conformers of 14R,15R,18R-1 at B3LYP-D3(BJ)/6-31G\* level of theory in methanol.**

| 14R,15R,18R-1000001_en_ |               | Standard Orientation (A.U.) |           |           |           |
|-------------------------|---------------|-----------------------------|-----------|-----------|-----------|
| Center number           | Atomic number | Atomic Type                 | X         | Y         | Z         |
| 0                       | 6             | 0                           | 7.11833   | -0.621942 | -1.541312 |
| 1                       | 6             | 0                           | 8.339731  | 1.539405  | -0.131792 |
| 2                       | 6             | 0                           | 6.470057  | 3.121028  | 1.484101  |
| 3                       | 6             | 0                           | 4.221926  | 4.081228  | 0.009352  |
| 4                       | 6             | 0                           | 1.867336  | 3.419416  | 0.67528   |
| 5                       | 6             | 0                           | -1.071774 | -2.227796 | 3.26425   |
| 6                       | 6             | 0                           | -0.19328  | -3.792653 | 1.127578  |
| 7                       | 6             | 0                           | 0.963895  | -2.732    | -0.869474 |
| 8                       | 6             | 0                           | 2.35448   | -4.046941 | -2.974803 |
| 9                       | 6             | 0                           | 5.069044  | -4.828559 | -2.170008 |
| 10                      | 6             | 0                           | 6.421596  | -2.852725 | -0.570972 |
| 11                      | 6             | 0                           | -0.508356 | 3.990981  | -0.786593 |
| 12                      | 6             | 0                           | -3.036914 | 4.017389  | 0.684741  |
| 13                      | 6             | 0                           | -4.047853 | 1.345907  | 1.505286  |
| 14                      | 6             | 0                           | -5.135975 | 4.739064  | -1.204577 |
| 15                      | 6             | 0                           | -5.594501 | 2.326389  | -2.762601 |
| 16                      | 6             | 0                           | -5.02451  | 0.06589   | -0.950478 |
| 17                      | 6             | 0                           | -7.401505 | -1.595394 | -0.58164  |
| 18                      | 6             | 0                           | -7.222125 | -3.507207 | 1.586194  |
| 19                      | 6             | 0                           | -8.037515 | -2.994542 | -3.04399  |
| 20                      | 6             | 0                           | -2.867599 | 5.857372  | 2.907779  |
| 21                      | 6             | 0                           | -0.354591 | -6.614221 | 1.534965  |
| 22                      | 6             | 0                           | 4.84259   | 5.683105  | -2.265854 |
| 23                      | 6             | 0                           | 6.791141  | -3.558119 | 2.162329  |
| 24                      | 1             | 0                           | -5.767137 | 1.824671  | 2.583792  |
| 25                      | 6             | 0                           | -2.479037 | -0.115892 | 3.386169  |
| 26                      | 1             | 0                           | 6.706568  | -0.275806 | -3.531479 |
| 27                      | 1             | 0                           | 9.273645  | 2.789894  | -1.493907 |
| 28                      | 1             | 0                           | 9.837743  | 0.845753  | 1.122644  |
| 29                      | 1             | 0                           | 5.802726  | 1.965599  | 3.066589  |
| 30                      | 1             | 0                           | 7.527904  | 4.719549  | 2.29437   |

|    |   |   |           |           |           |
|----|---|---|-----------|-----------|-----------|
| 31 | 1 | 0 | 1.644375  | 2.224345  | 2.330681  |
| 32 | 1 | 0 | -0.393419 | -2.930806 | 5.085902  |
| 33 | 1 | 0 | 1.15823   | -0.697822 | -0.86362  |
| 34 | 1 | 0 | 1.346542  | -5.726729 | -3.651623 |
| 35 | 1 | 0 | 2.481499  | -2.748187 | -4.583594 |
| 36 | 1 | 0 | 6.171046  | -5.267772 | -3.871467 |
| 37 | 1 | 0 | 4.941803  | -6.586482 | -1.08207  |
| 38 | 1 | 0 | -0.668154 | 2.633499  | -2.349586 |
| 39 | 1 | 0 | -0.336056 | 5.8448    | -1.700729 |
| 40 | 1 | 0 | -6.851801 | 5.244275  | -0.153098 |
| 41 | 1 | 0 | -4.630043 | 6.375357  | -2.369441 |
| 42 | 1 | 0 | -4.354147 | 2.277344  | -4.418117 |
| 43 | 1 | 0 | -7.531832 | 2.257944  | -3.484484 |
| 44 | 1 | 0 | -3.539619 | -1.125147 | -1.754421 |
| 45 | 1 | 0 | -8.976491 | -0.30441  | -0.144604 |
| 46 | 1 | 0 | -8.982788 | -4.591858 | 1.725757  |
| 47 | 1 | 0 | -6.884896 | -2.601046 | 3.411135  |
| 48 | 1 | 0 | -5.678365 | -4.846263 | 1.26341   |
| 49 | 1 | 0 | -9.80011  | -4.066889 | -2.858072 |
| 50 | 1 | 0 | -8.248809 | -1.703502 | -4.647126 |
| 51 | 1 | 0 | -6.528753 | -4.338449 | -3.513039 |
| 52 | 1 | 0 | -2.397241 | 7.764352  | 2.245951  |
| 53 | 1 | 0 | -4.67131  | 5.963448  | 3.923681  |
| 54 | 1 | 0 | -1.401087 | 5.292706  | 4.254532  |
| 55 | 1 | 0 | 0.733327  | -7.168274 | 3.214847  |
| 56 | 1 | 0 | -2.30821  | -7.217559 | 1.873778  |
| 57 | 1 | 0 | 0.379134  | -7.684618 | -0.071066 |
| 58 | 1 | 0 | 3.214903  | 6.745235  | -2.963878 |
| 59 | 1 | 0 | 6.349878  | 7.037428  | -1.822042 |
| 60 | 1 | 0 | 5.536519  | 4.517899  | -3.838329 |
| 61 | 1 | 0 | 7.895892  | -2.167952 | 3.215876  |
| 62 | 1 | 0 | 4.946915  | -3.747388 | 3.095031  |
| 63 | 1 | 0 | 7.739547  | -5.396512 | 2.33059   |
| 64 | 1 | 0 | -2.64548  | 0.674283  | 5.283634  |

| 14R,15R,18R-1000002_en_ |               | Standard Orientation (A.U.) |           |           |           |
|-------------------------|---------------|-----------------------------|-----------|-----------|-----------|
| Center number           | Atomic number | Atomic Type                 | X         | Y         | Z         |
| 0                       | 6             | 0                           | -6.64336  | -0.498405 | 1.674144  |
| 1                       | 6             | 0                           | -8.213427 | 1.062865  | -0.107952 |
| 2                       | 6             | 0                           | -6.535258 | 2.682396  | -1.905964 |
| 3                       | 6             | 0                           | -4.46274  | 4.053286  | -0.491615 |
| 4                       | 6             | 0                           | -2.089648 | 3.177267  | -0.645064 |

|    |   |   |           |           |           |
|----|---|---|-----------|-----------|-----------|
| 5  | 6 | 0 | 1.21762   | -1.816711 | -3.68013  |
| 6  | 6 | 0 | 0.415536  | -3.807686 | -1.899509 |
| 7  | 6 | 0 | -0.573155 | -3.297354 | 0.388756  |
| 8  | 6 | 0 | -1.732865 | -5.127536 | 2.227657  |
| 9  | 6 | 0 | -4.187541 | -4.061833 | 3.417644  |
| 10 | 6 | 0 | -5.992681 | -2.939965 | 1.500964  |
| 11 | 6 | 0 | 0.138689  | 3.886511  | 0.964165  |
| 12 | 6 | 0 | 2.739014  | 4.187479  | -0.355037 |
| 13 | 6 | 0 | 3.941064  | 1.651552  | -1.341082 |
| 14 | 6 | 0 | 4.698123  | 4.862611  | 1.691407  |
| 15 | 6 | 0 | 5.261476  | 2.351208  | 3.049884  |
| 16 | 6 | 0 | 4.849806  | 0.21607   | 1.04968   |
| 17 | 6 | 0 | 7.280792  | -1.360637 | 0.674917  |
| 18 | 6 | 0 | 7.207732  | -3.156503 | -1.596087 |
| 19 | 6 | 0 | 7.871763  | -2.879195 | 3.077104  |
| 20 | 6 | 0 | 2.553241  | 6.198234  | -2.422089 |
| 21 | 6 | 0 | 0.585428  | -6.438976 | -3.006123 |
| 22 | 6 | 0 | -5.321584 | 6.167642  | 1.212796  |
| 23 | 6 | 0 | -6.862646 | -4.696845 | -0.563652 |
| 24 | 1 | 0 | 5.68963   | 2.304696  | -2.272181 |
| 25 | 6 | 0 | 2.520477  | 0.351703  | -3.439377 |
| 26 | 1 | 0 | -5.829076 | 0.567097  | 3.236883  |
| 27 | 1 | 0 | -9.435658 | 2.326537  | 0.994487  |
| 28 | 1 | 0 | -9.471763 | -0.10887  | -1.259739 |
| 29 | 1 | 0 | -5.682523 | 1.416777  | -3.305016 |
| 30 | 1 | 0 | -7.757412 | 4.015776  | -2.929056 |
| 31 | 1 | 0 | -1.765986 | 1.625858  | -1.943415 |
| 32 | 1 | 0 | 0.59581   | -2.222712 | -5.607889 |
| 33 | 1 | 0 | -0.700945 | -1.330264 | 0.952537  |
| 34 | 1 | 0 | -2.137232 | -6.937047 | 1.312279  |
| 35 | 1 | 0 | -0.403601 | -5.554395 | 3.769134  |
| 36 | 1 | 0 | -3.688973 | -2.604001 | 4.803018  |
| 37 | 1 | 0 | -5.111459 | -5.597831 | 4.471027  |
| 38 | 1 | 0 | 0.323485  | 2.445192  | 2.450929  |
| 39 | 1 | 0 | -0.236721 | 5.657131  | 1.973074  |
| 40 | 1 | 0 | 6.415832  | 5.579033  | 0.774918  |
| 41 | 1 | 0 | 4.028537  | 6.344673  | 2.974279  |
| 42 | 1 | 0 | 3.998871  | 2.095659  | 4.668956  |
| 43 | 1 | 0 | 7.187714  | 2.32638   | 3.803248  |
| 44 | 1 | 0 | 3.372786  | -1.072352 | 1.699741  |
| 45 | 1 | 0 | 8.836531  | -0.011369 | 0.362315  |
| 46 | 1 | 0 | 5.679245  | -4.536637 | -1.389539 |
| 47 | 1 | 0 | 8.991868  | -4.201694 | -1.73688  |

|    |   |   |           |           |           |
|----|---|---|-----------|-----------|-----------|
| 48 | 1 | 0 | 6.909207  | -2.158919 | -3.379282 |
| 49 | 1 | 0 | 9.658632  | -3.909209 | 2.884709  |
| 50 | 1 | 0 | 8.014109  | -1.674849 | 4.753481  |
| 51 | 1 | 0 | 6.376581  | -4.273747 | 3.428263  |
| 52 | 1 | 0 | 1.976067  | 8.018792  | -1.616646 |
| 53 | 1 | 0 | 4.378186  | 6.470024  | -3.367068 |
| 54 | 1 | 0 | 1.147655  | 5.684644  | -3.851124 |
| 55 | 1 | 0 | -0.372405 | -6.517965 | -4.845334 |
| 56 | 1 | 0 | 2.563952  | -6.956411 | -3.351753 |
| 57 | 1 | 0 | -0.238545 | -7.888236 | -1.791475 |
| 58 | 1 | 0 | -3.751249 | 7.256114  | 1.995774  |
| 59 | 1 | 0 | -6.555436 | 7.479187  | 0.182058  |
| 60 | 1 | 0 | -6.436187 | 5.445244  | 2.810091  |
| 61 | 1 | 0 | -8.334915 | -3.86317  | -1.747129 |
| 62 | 1 | 0 | -5.278631 | -5.209181 | -1.801272 |
| 63 | 1 | 0 | -7.603718 | -6.46544  | 0.231181  |
| 64 | 1 | 0 | 2.652595  | 1.432409  | -5.190214 |

| 14R,15R,18R-1000003_en_ |               | Standard Orientation (A.U.) |           |           |           |
|-------------------------|---------------|-----------------------------|-----------|-----------|-----------|
| Center number           | Atomic number | Atomic Type                 | X         | Y         | Z         |
| 0                       | 6             | 0                           | 6.562535  | -0.157067 | -1.2106   |
| 1                       | 6             | 0                           | 7.884367  | 2.122832  | -0.149816 |
| 2                       | 6             | 0                           | 6.080957  | 3.760207  | 1.491757  |
| 3                       | 6             | 0                           | 3.745745  | 4.581023  | 0.065179  |
| 4                       | 6             | 0                           | 1.462568  | 3.680498  | 0.701736  |
| 5                       | 6             | 0                           | -0.988106 | -2.145962 | 3.359833  |
| 6                       | 6             | 0                           | 0.051603  | -3.712683 | 1.297567  |
| 7                       | 6             | 0                           | 1.141441  | -2.657845 | -0.740649 |
| 8                       | 6             | 0                           | 2.68365   | -3.988269 | -2.735704 |
| 9                       | 6             | 0                           | 5.349322  | -4.705776 | -1.783775 |
| 10                      | 6             | 0                           | 6.972587  | -2.601313 | -0.696708 |
| 11                      | 6             | 0                           | -0.937569 | 4.01752   | -0.79161  |
| 12                      | 6             | 0                           | -3.480869 | 3.839601  | 0.64321   |
| 13                      | 6             | 0                           | -4.260062 | 1.099468  | 1.484068  |
| 14                      | 6             | 0                           | -5.606344 | 4.350474  | -1.283637 |
| 15                      | 6             | 0                           | -5.828953 | 1.886375  | -2.814524 |
| 16                      | 6             | 0                           | -5.071923 | -0.29298  | -0.968899 |
| 17                      | 6             | 0                           | -7.283813 | -2.170037 | -0.612904 |
| 18                      | 6             | 0                           | -6.93433  | -4.049639 | 1.562736  |
| 19                      | 6             | 0                           | -7.7675   | -3.632946 | -3.072825 |
| 20                      | 6             | 0                           | -3.50805  | 5.71705   | 2.840736  |
| 21                      | 6             | 0                           | 0.123846  | -6.515021 | 1.850136  |

|    |   |   |           |           |           |
|----|---|---|-----------|-----------|-----------|
| 22 | 6 | 0 | 4.223747  | 6.260445  | -2.190771 |
| 23 | 6 | 0 | 9.045646  | -3.558397 | 1.010606  |
| 24 | 1 | 0 | -6.03426  | 1.43155   | 2.528405  |
| 25 | 6 | 0 | -2.588682 | -0.174409 | 3.410882  |
| 26 | 1 | 0 | 5.009887  | 0.305067  | -2.474217 |
| 27 | 1 | 0 | 8.610261  | 3.292644  | -1.705442 |
| 28 | 1 | 0 | 9.522664  | 1.598613  | 0.996673  |
| 29 | 1 | 0 | 5.529199  | 2.665015  | 3.160283  |
| 30 | 1 | 0 | 7.141012  | 5.421259  | 2.15557   |
| 31 | 1 | 0 | 1.347365  | 2.441527  | 2.334911  |
| 32 | 1 | 0 | -0.261556 | -2.719294 | 5.208269  |
| 33 | 1 | 0 | 1.116815  | -0.617425 | -0.853853 |
| 34 | 1 | 0 | 1.75316   | -5.726223 | -3.376095 |
| 35 | 1 | 0 | 2.837693  | -2.77254  | -4.405998 |
| 36 | 1 | 0 | 6.391271  | -5.656934 | -3.314733 |
| 37 | 1 | 0 | 5.124582  | -6.145423 | -0.304797 |
| 38 | 1 | 0 | -0.951824 | 2.625598  | -2.333346 |
| 39 | 1 | 0 | -0.916116 | 5.862493  | -1.738398 |
| 40 | 1 | 0 | -7.374703 | 4.715886  | -0.261918 |
| 41 | 1 | 0 | -5.228381 | 6.010321  | -2.463279 |
| 42 | 1 | 0 | -4.574305 | 1.931177  | -4.459385 |
| 43 | 1 | 0 | -7.745549 | 1.633898  | -3.55014  |
| 44 | 1 | 0 | -3.468682 | -1.346863 | -1.737117 |
| 45 | 1 | 0 | -8.977271 | -1.032962 | -0.190764 |
| 46 | 1 | 0 | -8.587475 | -5.291579 | 1.704065  |
| 47 | 1 | 0 | -6.68213  | -3.109034 | 3.383921  |
| 48 | 1 | 0 | -5.273117 | -5.240527 | 1.242354  |
| 49 | 1 | 0 | -6.133685 | -4.827209 | -3.527877 |
| 50 | 1 | 0 | -9.419461 | -4.869699 | -2.891815 |
| 51 | 1 | 0 | -8.093105 | -2.37506  | -4.683    |
| 52 | 1 | 0 | -3.200157 | 7.649226  | 2.1569    |
| 53 | 1 | 0 | -5.328661 | 5.673992  | 3.830635  |
| 54 | 1 | 0 | -2.016399 | 5.304929  | 4.214532  |
| 55 | 1 | 0 | 1.308785  | -6.902333 | 3.511029  |
| 56 | 1 | 0 | -1.76736  | -7.235624 | 2.295641  |
| 57 | 1 | 0 | 0.871816  | -7.614681 | 0.271016  |
| 58 | 1 | 0 | 2.51964   | 7.230831  | -2.83861  |
| 59 | 1 | 0 | 5.650586  | 7.698194  | -1.745984 |
| 60 | 1 | 0 | 4.960368  | 5.175448  | -3.801781 |
| 61 | 1 | 0 | 10.149713 | -5.036376 | 0.057919  |
| 62 | 1 | 0 | 10.35748  | -2.083627 | 1.612062  |
| 63 | 1 | 0 | 8.241703  | -4.433038 | 2.713967  |
| 64 | 1 | 0 | -2.840674 | 0.649886  | 5.284249  |



| 14R,15R,18R-1000004_en_ |               | Standard Orientation (A.U.) |           |           |           |
|-------------------------|---------------|-----------------------------|-----------|-----------|-----------|
| Center number           | Atomic number | Atomic Type                 | X         | Y         | Z         |
| 0                       | 6             | 0                           | -6.810511 | -0.011095 | 1.478076  |
| 1                       | 6             | 0                           | -8.160791 | 1.588521  | -0.444424 |
| 2                       | 6             | 0                           | -6.269784 | 2.992206  | -2.212613 |
| 3                       | 6             | 0                           | -4.171221 | 4.266581  | -0.744809 |
| 4                       | 6             | 0                           | -1.89195  | 3.161605  | -0.670061 |
| 5                       | 6             | 0                           | 1.172622  | -2.162471 | -3.393241 |
| 6                       | 6             | 0                           | 0.126194  | -4.005    | -1.579841 |
| 7                       | 6             | 0                           | -0.909422 | -3.324669 | 0.64304   |
| 8                       | 6             | 0                           | -2.31166  | -4.975733 | 2.481813  |
| 9                       | 6             | 0                           | -4.734927 | -3.672695 | 3.487632  |
| 10                      | 6             | 0                           | -6.346319 | -2.500528 | 1.433531  |
| 11                      | 6             | 0                           | 0.302802  | 3.768737  | 1.023332  |
| 12                      | 6             | 0                           | 2.96681   | 3.846843  | -0.196939 |
| 13                      | 6             | 0                           | 4.031196  | 1.208874  | -1.070386 |
| 14                      | 6             | 0                           | 4.900638  | 4.459897  | 1.897323  |
| 15                      | 6             | 0                           | 5.267897  | 1.959532  | 3.337791  |
| 16                      | 6             | 0                           | 4.778754  | -0.20318  | 1.389534  |
| 17                      | 6             | 0                           | 7.070195  | -2.0184   | 1.181301  |
| 18                      | 6             | 0                           | 9.446948  | -0.782419 | 0.066563  |
| 19                      | 6             | 0                           | 6.460974  | -4.473623 | -0.231908 |
| 20                      | 6             | 0                           | 2.992492  | 5.798451  | -2.329173 |
| 21                      | 6             | 0                           | 0.12219   | -6.682471 | -2.581832 |
| 22                      | 6             | 0                           | -4.932069 | 6.56937   | 0.74693   |
| 23                      | 6             | 0                           | -7.241519 | -4.270642 | -0.608491 |
| 24                      | 1             | 0                           | 5.828513  | 1.744735  | -1.966484 |
| 25                      | 6             | 0                           | 2.620513  | -0.083604 | -3.179221 |
| 26                      | 1             | 0                           | -5.992203 | 1.054475  | 3.038496  |
| 27                      | 1             | 0                           | -9.332955 | 2.988793  | 0.54148   |
| 28                      | 1             | 0                           | -9.448951 | 0.469257  | -1.615555 |
| 29                      | 1             | 0                           | -5.447769 | 1.602253  | -3.508314 |
| 30                      | 1             | 0                           | -7.327611 | 4.365639  | -3.35809  |
| 31                      | 1             | 0                           | -1.645537 | 1.498098  | -1.840233 |
| 32                      | 1             | 0                           | 0.617147  | -2.608831 | -5.332235 |
| 33                      | 1             | 0                           | -0.876141 | -1.336408 | 1.139741  |
| 34                      | 1             | 0                           | -2.808721 | -6.786003 | 1.615937  |
| 35                      | 1             | 0                           | -1.108363 | -5.437403 | 4.114095  |
| 36                      | 1             | 0                           | -4.197168 | -2.197643 | 4.839812  |
| 37                      | 1             | 0                           | -5.829329 | -5.086668 | 4.548778  |
| 38                      | 1             | 0                           | 0.324822  | 2.36536   | 2.556899  |

|    |   |   |           |           |           |
|----|---|---|-----------|-----------|-----------|
| 39 | 1 | 0 | 0.01001   | 5.593014  | 1.960838  |
| 40 | 1 | 0 | 6.685845  | 5.046568  | 1.018344  |
| 41 | 1 | 0 | 4.279932  | 6.016219  | 3.115338  |
| 42 | 1 | 0 | 3.928142  | 1.821331  | 4.909477  |
| 43 | 1 | 0 | 7.155748  | 1.827585  | 4.173983  |
| 44 | 1 | 0 | 3.18785   | -1.345163 | 2.041671  |
| 45 | 1 | 0 | 7.519734  | -2.543533 | 3.143266  |
| 46 | 1 | 0 | 9.24441   | -0.449089 | -1.967729 |
| 47 | 1 | 0 | 11.088752 | -2.018927 | 0.32137   |
| 48 | 1 | 0 | 9.884383  | 1.031807  | 0.964912  |
| 49 | 1 | 0 | 8.072308  | -5.775164 | -0.159289 |
| 50 | 1 | 0 | 4.824494  | -5.425887 | 0.601378  |
| 51 | 1 | 0 | 6.02707   | -4.103612 | -2.219678 |
| 52 | 1 | 0 | 1.611193  | 5.331321  | -3.797319 |
| 53 | 1 | 0 | 2.507685  | 7.678484  | -1.60324  |
| 54 | 1 | 0 | 4.86611   | 5.920735  | -3.207504 |
| 55 | 1 | 0 | -0.882481 | -8.008404 | -1.362073 |
| 56 | 1 | 0 | -0.744913 | -6.756116 | -4.465542 |
| 57 | 1 | 0 | 2.065519  | -7.373695 | -2.7968   |
| 58 | 1 | 0 | -5.870139 | 7.955213  | -0.480331 |
| 59 | 1 | 0 | -6.299117 | 6.083653  | 2.233474  |
| 60 | 1 | 0 | -3.332314 | 7.50655   | 1.655627  |
| 61 | 1 | 0 | -5.639696 | -4.946255 | -1.740047 |
| 62 | 1 | 0 | -8.153181 | -5.947109 | 0.208386  |
| 63 | 1 | 0 | -8.584965 | -3.379764 | -1.898879 |
| 64 | 1 | 0 | 2.911564  | 0.900063  | -4.967522 |

**Table S9. Gibbs free energies<sup>a</sup> and equilibrium populations<sup>b</sup> of low-energy conformers of 1.**

| Conformers        | $\Delta G$ | P(%) / 100 | Single point energy (a.u.) |
|-------------------|------------|------------|----------------------------|
| CMD1000002_tddft_ | 0.0        | 64.99      | -976.573385327             |
| CMD1000004_tddft_ | 0.00312    | 2.38       | -976.5702657806            |
| CMD1000006_tddft_ | 0.00201    | 7.68       | -976.5713705845            |
| CMD1000010_tddft_ | 0.00244    | 4.87       | -976.5709405518            |
| CMD1000011_tddft_ | 0.00135    | 15.5       | -976.5720327869            |
| CMD1000012_tddft_ | 0.0025     | 4.58       | -976.5708816196            |

<sup>a</sup>wB97M-V/def2-TZVP, in kcal/mol.

<sup>b</sup>From  $\Delta G$  values at 298.15K.

**Table S10. Cartesian coordinates for the low-energy reoptimized random research conformers of 1 at PBE0-D3(BJ)/def2-SVP level of theory in methanol.**

| CMD1000002_en_ |               | Standard Orientation (Ångstroms) |            |           |           |
|----------------|---------------|----------------------------------|------------|-----------|-----------|
| Center number  | Atomic number | Atomic Type                      | X          | Y         | Z         |
| 0              | 6             | 0                                | -17.80222  | -2.969839 | 1.600162  |
| 1              | 6             | 0                                | -18.963713 | -5.119775 | 0.194394  |
| 2              | 6             | 0                                | -18.664977 | -4.810013 | -2.685614 |
| 3              | 6             | 0                                | -15.982932 | -4.907253 | -3.610819 |
| 4              | 6             | 0                                | -14.886444 | -2.866411 | -4.616228 |
| 5              | 6             | 0                                | -14.286255 | 4.210451  | -4.924006 |
| 6              | 6             | 0                                | -15.625369 | 4.828347  | -2.580353 |
| 7              | 6             | 0                                | -16.096738 | 3.141194  | -0.753574 |
| 8              | 6             | 0                                | -17.304451 | 3.66476   | 1.751     |
| 9              | 6             | 0                                | -17.44272  | 1.303799  | 3.423636  |
| 10             | 6             | 0                                | -18.926146 | -0.80513  | 2.244462  |
| 11             | 6             | 0                                | -12.30366  | -2.666424 | -5.727048 |
| 12             | 6             | 0                                | -10.227753 | -1.438342 | -4.086897 |
| 13             | 6             | 0                                | -10.704424 | 1.386351  | -3.364072 |
| 14             | 6             | 0                                | -12.223023 | 2.790909  | -5.2733   |
| 15             | 6             | 0                                | -7.713692  | -1.379353 | -5.608802 |
| 16             | 6             | 0                                | -6.625638  | 1.290497  | -5.394823 |
| 17             | 6             | 0                                | -7.991407  | 2.478631  | -3.152977 |
| 18             | 6             | 0                                | -7.794241  | 5.346201  | -2.928891 |
| 19             | 6             | 0                                | -9.132659  | 6.30136   | -0.56689  |
| 20             | 6             | 0                                | -5.050619  | 6.220476  | -2.938602 |
| 21             | 6             | 0                                | -9.903385  | -2.979473 | -1.673871 |
| 22             | 6             | 0                                | -16.412313 | 7.547294  | -2.382532 |
| 23             | 6             | 0                                | -14.707011 | -7.415978 | -3.312472 |
| 24             | 6             | 0                                | -21.652991 | -0.238714 | 1.743017  |
| 25             | 1             | 0                                | -11.637416 | 1.490017  | -1.543918 |
| 26             | 1             | 0                                | -15.797339 | -3.146512 | 1.998459  |
| 27             | 1             | 0                                | -20.972451 | -5.284098 | 0.618058  |
| 28             | 1             | 0                                | -18.108672 | -6.899484 | 0.788502  |
| 29             | 1             | 0                                | -19.742181 | -6.316164 | -3.609512 |
| 30             | 1             | 0                                | -19.527579 | -3.024813 | -3.240651 |
| 31             | 1             | 0                                | -15.99708  | -1.146331 | -4.707114 |
| 32             | 1             | 0                                | -14.994017 | 5.199865  | -6.581178 |

|    |   |   |            |           |           |
|----|---|---|------------|-----------|-----------|
| 33 | 1 | 0 | -15.586949 | 1.190495  | -1.083654 |
| 34 | 1 | 0 | -19.204828 | 4.437274  | 1.503263  |
| 35 | 1 | 0 | -16.255029 | 5.12778   | 2.764441  |
| 36 | 1 | 0 | -18.293114 | 1.833956  | 5.231787  |
| 37 | 1 | 0 | -15.528175 | 0.658308  | 3.832663  |
| 38 | 1 | 0 | -12.440539 | -1.59807  | -7.486415 |
| 39 | 1 | 0 | -11.603632 | -4.531052 | -6.256984 |
| 40 | 1 | 0 | -11.495721 | 2.73087   | -7.190966 |
| 41 | 1 | 0 | -6.40409   | -2.774096 | -4.84588  |
| 42 | 1 | 0 | -8.028796  | -1.901018 | -7.575523 |
| 43 | 1 | 0 | -7.018836  | 2.38256   | -7.101064 |
| 44 | 1 | 0 | -4.582572  | 1.286462  | -5.161507 |
| 45 | 1 | 0 | -7.170729  | 1.688863  | -1.424918 |
| 46 | 1 | 0 | -8.733532  | 6.172831  | -4.574571 |
| 47 | 1 | 0 | -9.028413  | 8.354803  | -0.436094 |
| 48 | 1 | 0 | -11.114202 | 5.764617  | -0.536966 |
| 49 | 1 | 0 | -8.248201  | 5.528309  | 1.129934  |
| 50 | 1 | 0 | -4.928846  | 8.262614  | -2.697493 |
| 51 | 1 | 0 | -4.088732  | 5.74652   | -4.693481 |
| 52 | 1 | 0 | -3.9967    | 5.351799  | -1.391646 |
| 53 | 1 | 0 | -11.656003 | -3.0425   | -0.598994 |
| 54 | 1 | 0 | -9.372076  | -4.920151 | -2.117663 |
| 55 | 1 | 0 | -8.434575  | -2.199554 | -0.46251  |
| 56 | 1 | 0 | -17.37924  | 8.152872  | -4.100544 |
| 57 | 1 | 0 | -17.663172 | 7.898709  | -0.794129 |
| 58 | 1 | 0 | -14.766476 | 8.775266  | -2.176121 |
| 59 | 1 | 0 | -15.954265 | -8.949293 | -3.901421 |
| 60 | 1 | 0 | -12.967198 | -7.561417 | -4.388719 |
| 61 | 1 | 0 | -14.226633 | -7.777242 | -1.338155 |
| 62 | 1 | 0 | -22.521308 | 0.696054  | 3.363311  |
| 63 | 1 | 0 | -21.859388 | 1.046921  | 0.142351  |
| 64 | 1 | 0 | -22.753321 | -1.916969 | 1.314755  |

| CMD1000002_tddft_ |               | Standard Orientation (Ångstroms) |            |           |           |
|-------------------|---------------|----------------------------------|------------|-----------|-----------|
| Center number     | Atomic number | Atomic Type                      | X          | Y         | Z         |
| 0                 | 6             | 0                                | -17.80222  | -2.969839 | 1.600162  |
| 1                 | 6             | 0                                | -18.963713 | -5.119775 | 0.194394  |
| 2                 | 6             | 0                                | -18.664977 | -4.810013 | -2.685614 |
| 3                 | 6             | 0                                | -15.982932 | -4.907253 | -3.610819 |
| 4                 | 6             | 0                                | -14.886444 | -2.866411 | -4.616228 |
| 5                 | 6             | 0                                | -14.286255 | 4.210451  | -4.924006 |
| 6                 | 6             | 0                                | -15.625369 | 4.828347  | -2.580353 |

|    |   |   |            |           |           |
|----|---|---|------------|-----------|-----------|
| 7  | 6 | 0 | -16.096738 | 3.141194  | -0.753574 |
| 8  | 6 | 0 | -17.304451 | 3.66476   | 1.751     |
| 9  | 6 | 0 | -17.44272  | 1.303799  | 3.423636  |
| 10 | 6 | 0 | -18.926146 | -0.80513  | 2.244462  |
| 11 | 6 | 0 | -12.30366  | -2.666424 | -5.727048 |
| 12 | 6 | 0 | -10.227753 | -1.438342 | -4.086897 |
| 13 | 6 | 0 | -10.704424 | 1.386351  | -3.364072 |
| 14 | 6 | 0 | -12.223023 | 2.790909  | -5.2733   |
| 15 | 6 | 0 | -7.713692  | -1.379353 | -5.608802 |
| 16 | 6 | 0 | -6.625638  | 1.290497  | -5.394823 |
| 17 | 6 | 0 | -7.991407  | 2.478631  | -3.152977 |
| 18 | 6 | 0 | -7.794241  | 5.346201  | -2.928891 |
| 19 | 6 | 0 | -9.132659  | 6.30136   | -0.56689  |
| 20 | 6 | 0 | -5.050619  | 6.220476  | -2.938602 |
| 21 | 6 | 0 | -9.903385  | -2.979473 | -1.673871 |
| 22 | 6 | 0 | -16.412313 | 7.547294  | -2.382532 |
| 23 | 6 | 0 | -14.707011 | -7.415978 | -3.312472 |
| 24 | 6 | 0 | -21.652991 | -0.238714 | 1.743017  |
| 25 | 1 | 0 | -11.637416 | 1.490017  | -1.543918 |
| 26 | 1 | 0 | -15.797339 | -3.146512 | 1.998459  |
| 27 | 1 | 0 | -20.972451 | -5.284098 | 0.618058  |
| 28 | 1 | 0 | -18.108672 | -6.899484 | 0.788502  |
| 29 | 1 | 0 | -19.742181 | -6.316164 | -3.609512 |
| 30 | 1 | 0 | -19.527579 | -3.024813 | -3.240651 |
| 31 | 1 | 0 | -15.99708  | -1.146331 | -4.707114 |
| 32 | 1 | 0 | -14.994017 | 5.199865  | -6.581178 |
| 33 | 1 | 0 | -15.586949 | 1.190495  | -1.083654 |
| 34 | 1 | 0 | -19.204828 | 4.437274  | 1.503263  |
| 35 | 1 | 0 | -16.255029 | 5.12778   | 2.764441  |
| 36 | 1 | 0 | -18.293114 | 1.833956  | 5.231787  |
| 37 | 1 | 0 | -15.528175 | 0.658308  | 3.832663  |
| 38 | 1 | 0 | -12.440539 | -1.59807  | -7.486415 |
| 39 | 1 | 0 | -11.603632 | -4.531052 | -6.256984 |
| 40 | 1 | 0 | -11.495721 | 2.73087   | -7.190966 |
| 41 | 1 | 0 | -6.40409   | -2.774096 | -4.84588  |
| 42 | 1 | 0 | -8.028796  | -1.901018 | -7.575523 |
| 43 | 1 | 0 | -7.018836  | 2.38256   | -7.101064 |
| 44 | 1 | 0 | -4.582572  | 1.286462  | -5.161507 |
| 45 | 1 | 0 | -7.170729  | 1.688863  | -1.424918 |
| 46 | 1 | 0 | -8.733532  | 6.172831  | -4.574571 |
| 47 | 1 | 0 | -9.028413  | 8.354803  | -0.436094 |
| 48 | 1 | 0 | -11.114202 | 5.764617  | -0.536966 |
| 49 | 1 | 0 | -8.248201  | 5.528309  | 1.129934  |

|    |   |   |            |           |           |
|----|---|---|------------|-----------|-----------|
| 50 | 1 | 0 | -4.928846  | 8.262614  | -2.697493 |
| 51 | 1 | 0 | -4.088732  | 5.74652   | -4.693481 |
| 52 | 1 | 0 | -3.9967    | 5.351799  | -1.391646 |
| 53 | 1 | 0 | -11.656003 | -3.0425   | -0.598994 |
| 54 | 1 | 0 | -9.372076  | -4.920151 | -2.117663 |
| 55 | 1 | 0 | -8.434575  | -2.199554 | -0.46251  |
| 56 | 1 | 0 | -17.37924  | 8.152872  | -4.100544 |
| 57 | 1 | 0 | -17.663172 | 7.898709  | -0.794129 |
| 58 | 1 | 0 | -14.766476 | 8.775266  | -2.176121 |
| 59 | 1 | 0 | -15.954265 | -8.949293 | -3.901421 |
| 60 | 1 | 0 | -12.967198 | -7.561417 | -4.388719 |
| 61 | 1 | 0 | -14.226633 | -7.777242 | -1.338155 |
| 62 | 1 | 0 | -22.521308 | 0.696054  | 3.363311  |
| 63 | 1 | 0 | -21.859388 | 1.046921  | 0.142351  |
| 64 | 1 | 0 | -22.753321 | -1.916969 | 1.314755  |

| CMD1000004_en_ |               | Standard Orientation (Ångstroms) |            |           |           |
|----------------|---------------|----------------------------------|------------|-----------|-----------|
| Center number  | Atomic number | Atomic Type                      | X          | Y         | Z         |
| 0              | 6             | 0                                | -20.448012 | -2.03594  | -1.075455 |
| 1              | 6             | 0                                | -20.287289 | -4.561091 | -2.302809 |
| 2              | 6             | 0                                | -18.748115 | -4.471143 | -4.770622 |
| 3              | 6             | 0                                | -15.922978 | -4.554665 | -4.475416 |
| 4              | 6             | 0                                | -14.491779 | -2.555936 | -5.061701 |
| 5              | 6             | 0                                | -14.021951 | 4.294135  | -4.492462 |
| 6              | 6             | 0                                | -15.544712 | 4.745122  | -2.221679 |
| 7              | 6             | 0                                | -16.094995 | 2.875512  | -0.604949 |
| 8              | 6             | 0                                | -17.435951 | 3.020979  | 1.862614  |
| 9              | 6             | 0                                | -19.880153 | 1.447092  | 1.926882  |
| 10             | 6             | 0                                | -19.530933 | -1.258445 | 1.138445  |
| 11             | 6             | 0                                | -11.676074 | -2.468733 | -5.270278 |
| 12             | 6             | 0                                | -10.087526 | -1.300132 | -3.116531 |
| 13             | 6             | 0                                | -10.489462 | 1.611885  | -2.661891 |
| 14             | 6             | 0                                | -11.887726 | 2.954606  | -4.701821 |
| 15             | 6             | 0                                | -7.250375  | -1.541843 | -3.854936 |
| 16             | 6             | 0                                | -6.278084  | 1.125153  | -4.289023 |
| 17             | 6             | 0                                | -7.764723  | 2.661233  | -2.367837 |
| 18             | 6             | 0                                | -7.492657  | 5.528893  | -2.484501 |
| 19             | 6             | 0                                | -8.930276  | 6.791311  | -0.335384 |
| 20             | 6             | 0                                | -4.729835  | 6.339647  | -2.442791 |
| 21             | 6             | 0                                | -10.618565 | -2.708753 | -0.665925 |
| 22             | 6             | 0                                | -16.401382 | 7.432695  | -1.920155 |
| 23             | 6             | 0                                | -14.900848 | -7.049568 | -3.615389 |

|    |   |   |            |           |           |
|----|---|---|------------|-----------|-----------|
| 24 | 6 | 0 | -18.080482 | -2.886573 | 2.93584   |
| 25 | 1 | 0 | -11.509025 | 1.872066  | -0.904779 |
| 26 | 1 | 0 | -21.434234 | -0.633439 | -2.209225 |
| 27 | 1 | 0 | -22.201951 | -5.182404 | -2.773354 |
| 28 | 1 | 0 | -19.523562 | -5.991973 | -1.038492 |
| 29 | 1 | 0 | -19.306474 | -6.085229 | -5.937443 |
| 30 | 1 | 0 | -19.288321 | -2.784977 | -5.825001 |
| 31 | 1 | 0 | -15.463535 | -0.839516 | -5.612289 |
| 32 | 1 | 0 | -14.645718 | 5.305524  | -6.169856 |
| 33 | 1 | 0 | -15.530388 | 0.986271  | -1.146006 |
| 34 | 1 | 0 | -17.887989 | 4.959349  | 2.380971  |
| 35 | 1 | 0 | -16.156796 | 2.334408  | 3.336246  |
| 36 | 1 | 0 | -21.26002  | 2.344072  | 0.688712  |
| 37 | 1 | 0 | -20.651002 | 1.525192  | 3.844203  |
| 38 | 1 | 0 | -11.209889 | -1.470726 | -7.016227 |
| 39 | 1 | 0 | -10.95553  | -4.381015 | -5.5316   |
| 40 | 1 | 0 | -11.00633  | 2.937135  | -6.554059 |
| 41 | 1 | 0 | -6.203051  | -2.403646 | -2.301443 |
| 42 | 1 | 0 | -6.986563  | -2.765632 | -5.489559 |
| 43 | 1 | 0 | -6.708601  | 1.774072  | -6.202444 |
| 44 | 1 | 0 | -4.240232  | 1.267333  | -4.048405 |
| 45 | 1 | 0 | -7.11337   | 2.068838  | -0.49044  |
| 46 | 1 | 0 | -8.316846  | 6.17381   | -4.266796 |
| 47 | 1 | 0 | -10.91722  | 6.273898  | -0.332001 |
| 48 | 1 | 0 | -8.135947  | 6.243578  | 1.488522  |
| 49 | 1 | 0 | -8.810508  | 8.843712  | -0.468341 |
| 50 | 1 | 0 | -3.779193  | 5.624643  | -0.756798 |
| 51 | 1 | 0 | -4.568124  | 8.393021  | -2.419281 |
| 52 | 1 | 0 | -3.695609  | 5.655002  | -4.082964 |
| 53 | 1 | 0 | -9.559592  | -1.887895 | 0.899066  |
| 54 | 1 | 0 | -12.619585 | -2.646911 | -0.193304 |
| 55 | 1 | 0 | -10.071354 | -4.689953 | -0.814602 |
| 56 | 1 | 0 | -17.711703 | 7.69077   | -0.36277  |
| 57 | 1 | 0 | -14.799961 | 8.697567  | -1.623741 |
| 58 | 1 | 0 | -17.339418 | 8.077093  | -3.640996 |
| 59 | 1 | 0 | -15.465615 | -7.445577 | -1.67053  |
| 60 | 1 | 0 | -15.650171 | -8.59111  | -4.764396 |
| 61 | 1 | 0 | -12.854295 | -7.147138 | -3.673495 |
| 62 | 1 | 0 | -17.850692 | -4.811247 | 2.264771  |
| 63 | 1 | 0 | -16.19463  | -2.124052 | 3.278045  |
| 64 | 1 | 0 | -19.016106 | -2.960681 | 4.774544  |

|                   |                                  |
|-------------------|----------------------------------|
| CMD1000004_tddft_ | Standard Orientation (Ångstroms) |
|-------------------|----------------------------------|



| Center number | Atomic number | Atomic Type | X          | Y         | Z         |
|---------------|---------------|-------------|------------|-----------|-----------|
| 0             | 6             | 0           | -20.448012 | -2.03594  | -1.075455 |
| 1             | 6             | 0           | -20.287289 | -4.561091 | -2.302809 |
| 2             | 6             | 0           | -18.748115 | -4.471143 | -4.770622 |
| 3             | 6             | 0           | -15.922978 | -4.554665 | -4.475416 |
| 4             | 6             | 0           | -14.491779 | -2.555936 | -5.061701 |
| 5             | 6             | 0           | -14.021951 | 4.294135  | -4.492462 |
| 6             | 6             | 0           | -15.544712 | 4.745122  | -2.221679 |
| 7             | 6             | 0           | -16.094995 | 2.875512  | -0.604949 |
| 8             | 6             | 0           | -17.435951 | 3.020979  | 1.862614  |
| 9             | 6             | 0           | -19.880153 | 1.447092  | 1.926882  |
| 10            | 6             | 0           | -19.530933 | -1.258445 | 1.138445  |
| 11            | 6             | 0           | -11.676074 | -2.468733 | -5.270278 |
| 12            | 6             | 0           | -10.087526 | -1.300132 | -3.116531 |
| 13            | 6             | 0           | -10.489462 | 1.611885  | -2.661891 |
| 14            | 6             | 0           | -11.887726 | 2.954606  | -4.701821 |
| 15            | 6             | 0           | -7.250375  | -1.541843 | -3.854936 |
| 16            | 6             | 0           | -6.278084  | 1.125153  | -4.289023 |
| 17            | 6             | 0           | -7.764723  | 2.661233  | -2.367837 |
| 18            | 6             | 0           | -7.492657  | 5.528893  | -2.484501 |
| 19            | 6             | 0           | -8.930276  | 6.791311  | -0.335384 |
| 20            | 6             | 0           | -4.729835  | 6.339647  | -2.442791 |
| 21            | 6             | 0           | -10.618565 | -2.708753 | -0.665925 |
| 22            | 6             | 0           | -16.401382 | 7.432695  | -1.920155 |
| 23            | 6             | 0           | -14.900848 | -7.049568 | -3.615389 |
| 24            | 6             | 0           | -18.080482 | -2.886573 | 2.93584   |
| 25            | 1             | 0           | -11.509025 | 1.872066  | -0.904779 |
| 26            | 1             | 0           | -21.434234 | -0.633439 | -2.209225 |
| 27            | 1             | 0           | -22.201951 | -5.182404 | -2.773354 |
| 28            | 1             | 0           | -19.523562 | -5.991973 | -1.038492 |
| 29            | 1             | 0           | -19.306474 | -6.085229 | -5.937443 |
| 30            | 1             | 0           | -19.288321 | -2.784977 | -5.825001 |
| 31            | 1             | 0           | -15.463535 | -0.839516 | -5.612289 |
| 32            | 1             | 0           | -14.645718 | 5.305524  | -6.169856 |
| 33            | 1             | 0           | -15.530388 | 0.986271  | -1.146006 |
| 34            | 1             | 0           | -17.887989 | 4.959349  | 2.380971  |
| 35            | 1             | 0           | -16.156796 | 2.334408  | 3.336246  |
| 36            | 1             | 0           | -21.26002  | 2.344072  | 0.688712  |
| 37            | 1             | 0           | -20.651002 | 1.525192  | 3.844203  |
| 38            | 1             | 0           | -11.209889 | -1.470726 | -7.016227 |
| 39            | 1             | 0           | -10.95553  | -4.381015 | -5.5316   |
| 40            | 1             | 0           | -11.00633  | 2.937135  | -6.554059 |

|    |   |   |            |           |           |
|----|---|---|------------|-----------|-----------|
| 41 | 1 | 0 | -6.203051  | -2.403646 | -2.301443 |
| 42 | 1 | 0 | -6.986563  | -2.765632 | -5.489559 |
| 43 | 1 | 0 | -6.708601  | 1.774072  | -6.202444 |
| 44 | 1 | 0 | -4.240232  | 1.267333  | -4.048405 |
| 45 | 1 | 0 | -7.11337   | 2.068838  | -0.49044  |
| 46 | 1 | 0 | -8.316846  | 6.17381   | -4.266796 |
| 47 | 1 | 0 | -10.91722  | 6.273898  | -0.332001 |
| 48 | 1 | 0 | -8.135947  | 6.243578  | 1.488522  |
| 49 | 1 | 0 | -8.810508  | 8.843712  | -0.468341 |
| 50 | 1 | 0 | -3.779193  | 5.624643  | -0.756798 |
| 51 | 1 | 0 | -4.568124  | 8.393021  | -2.419281 |
| 52 | 1 | 0 | -3.695609  | 5.655002  | -4.082964 |
| 53 | 1 | 0 | -9.559592  | -1.887895 | 0.899066  |
| 54 | 1 | 0 | -12.619585 | -2.646911 | -0.193304 |
| 55 | 1 | 0 | -10.071354 | -4.689953 | -0.814602 |
| 56 | 1 | 0 | -17.711703 | 7.69077   | -0.36277  |
| 57 | 1 | 0 | -14.799961 | 8.697567  | -1.623741 |
| 58 | 1 | 0 | -17.339418 | 8.077093  | -3.640996 |
| 59 | 1 | 0 | -15.465615 | -7.445577 | -1.67053  |
| 60 | 1 | 0 | -15.650171 | -8.59111  | -4.764396 |
| 61 | 1 | 0 | -12.854295 | -7.147138 | -3.673495 |
| 62 | 1 | 0 | -17.850692 | -4.811247 | 2.264771  |
| 63 | 1 | 0 | -16.19463  | -2.124052 | 3.278045  |
| 64 | 1 | 0 | -19.016106 | -2.960681 | 4.774544  |

| CMD1000006_en_ |               | Standard Orientation (Ångstroms) |            |           |           |
|----------------|---------------|----------------------------------|------------|-----------|-----------|
| Center number  | Atomic number | Atomic Type                      | X          | Y         | Z         |
| 0              | 6             | 0                                | -17.163383 | -2.719151 | 1.90079   |
| 1              | 6             | 0                                | -17.98572  | -5.118678 | 0.653348  |
| 2              | 6             | 0                                | -18.562949 | -4.716708 | -2.151839 |
| 3              | 6             | 0                                | -16.449127 | -3.793859 | -3.825763 |
| 4              | 6             | 0                                | -14.017807 | -4.075208 | -3.222366 |
| 5              | 6             | 0                                | -14.160286 | 3.454481  | -5.250168 |
| 6              | 6             | 0                                | -15.648072 | 4.356032  | -3.094827 |
| 7              | 6             | 0                                | -16.249715 | 2.887624  | -1.124845 |
| 8              | 6             | 0                                | -17.644326 | 3.678411  | 1.207132  |
| 9              | 6             | 0                                | -17.503819 | 1.692381  | 3.323143  |
| 10             | 6             | 0                                | -18.643894 | -0.780579 | 2.538639  |
| 11             | 6             | 0                                | -11.755146 | -3.433286 | -4.771802 |
| 12             | 6             | 0                                | -9.739973  | -1.746363 | -3.528922 |
| 13             | 6             | 0                                | -10.548979 | 1.054701  | -3.118753 |
| 14             | 6             | 0                                | -12.03816  | 2.083616  | -5.277848 |

|    |   |   |            |           |           |
|----|---|---|------------|-----------|-----------|
| 15 | 6 | 0 | -7.433185  | -1.507092 | -5.305805 |
| 16 | 6 | 0 | -6.329778  | 1.150014  | -4.919587 |
| 17 | 6 | 0 | -7.962467  | 2.419895  | -2.888768 |
| 18 | 6 | 0 | -8.015913  | 5.30192   | -2.970854 |
| 19 | 6 | 0 | -9.561929  | 6.382273  | -0.797924 |
| 20 | 6 | 0 | -5.353101  | 6.397744  | -2.935712 |
| 21 | 6 | 0 | -8.908167  | -2.899544 | -1.015801 |
| 22 | 6 | 0 | -16.471183 | 7.062559  | -3.315156 |
| 23 | 6 | 0 | -17.381587 | -2.600359 | -6.213468 |
| 24 | 6 | 0 | -21.463466 | -0.818142 | 2.321929  |
| 25 | 1 | 0 | -11.612283 | 1.246998  | -1.37822  |
| 26 | 1 | 0 | -15.14237  | -2.462496 | 2.122401  |
| 27 | 1 | 0 | -19.684917 | -5.873648 | 1.546252  |
| 28 | 1 | 0 | -16.546773 | -6.574489 | 0.887152  |
| 29 | 1 | 0 | -19.308414 | -6.473703 | -2.959605 |
| 30 | 1 | 0 | -20.117955 | -3.365252 | -2.291812 |
| 31 | 1 | 0 | -13.5941   | -4.982682 | -1.437044 |
| 32 | 1 | 0 | -14.805822 | 4.15852   | -7.071533 |
| 33 | 1 | 0 | -15.723406 | 0.914411  | -1.216496 |
| 34 | 1 | 0 | -19.630879 | 4.053566  | 0.771909  |
| 35 | 1 | 0 | -16.900405 | 5.461497  | 1.933405  |
| 36 | 1 | 0 | -18.47016  | 2.439885  | 4.988676  |
| 37 | 1 | 0 | -15.528891 | 1.417021  | 3.844853  |
| 38 | 1 | 0 | -12.305547 | -2.586873 | -6.559831 |
| 39 | 1 | 0 | -10.798172 | -5.205528 | -5.262369 |
| 40 | 1 | 0 | -11.202533 | 1.777564  | -7.12761  |
| 41 | 1 | 0 | -6.064947  | -2.996042 | -4.915268 |
| 42 | 1 | 0 | -8.021761  | -1.768896 | -7.262597 |
| 43 | 1 | 0 | -6.43073   | 2.230317  | -6.672397 |
| 44 | 1 | 0 | -4.346141  | 1.108456  | -4.38002  |
| 45 | 1 | 0 | -7.201827  | 1.908263  | -1.03749  |
| 46 | 1 | 0 | -8.917508  | 5.868096  | -4.742813 |
| 47 | 1 | 0 | -11.497454 | 5.699375  | -0.817647 |
| 48 | 1 | 0 | -8.729621  | 5.858471  | 1.016459  |
| 49 | 1 | 0 | -9.614842  | 8.440424  | -0.879791 |
| 50 | 1 | 0 | -4.245475  | 5.798724  | -4.561973 |
| 51 | 1 | 0 | -4.337671  | 5.813401  | -1.236743 |
| 52 | 1 | 0 | -5.406734  | 8.456811  | -2.943808 |
| 53 | 1 | 0 | -7.213847  | -1.999216 | -0.279679 |
| 54 | 1 | 0 | -10.370113 | -2.73361  | 0.423218  |
| 55 | 1 | 0 | -8.47702   | -4.901873 | -1.247519 |
| 56 | 1 | 0 | -17.643202 | 7.666466  | -1.743137 |
| 57 | 1 | 0 | -14.845334 | 8.326331  | -3.430387 |

|    |   |   |            |           |           |
|----|---|---|------------|-----------|-----------|
| 58 | 1 | 0 | -17.55242  | 7.346488  | -5.050055 |
| 59 | 1 | 0 | -18.357968 | -0.834494 | -5.780549 |
| 60 | 1 | 0 | -15.892852 | -2.165252 | -7.552815 |
| 61 | 1 | 0 | -18.753289 | -3.823967 | -7.153225 |
| 62 | 1 | 0 | -22.333994 | -0.091918 | 4.045739  |
| 63 | 1 | 0 | -22.1193   | 0.390664  | 0.783604  |
| 64 | 1 | 0 | -22.20982  | -2.699284 | 1.981213  |

| CMD100006_tddft_ |               | Standard Orientation (Ångstroms) |            |           |           |
|------------------|---------------|----------------------------------|------------|-----------|-----------|
| Center number    | Atomic number | Atomic Type                      | X          | Y         | Z         |
| 0                | 6             | 0                                | -17.163383 | -2.719151 | 1.90079   |
| 1                | 6             | 0                                | -17.98572  | -5.118678 | 0.653348  |
| 2                | 6             | 0                                | -18.562949 | -4.716708 | -2.151839 |
| 3                | 6             | 0                                | -16.449127 | -3.793859 | -3.825763 |
| 4                | 6             | 0                                | -14.017807 | -4.075208 | -3.222366 |
| 5                | 6             | 0                                | -14.160286 | 3.454481  | -5.250168 |
| 6                | 6             | 0                                | -15.648072 | 4.356032  | -3.094827 |
| 7                | 6             | 0                                | -16.249715 | 2.887624  | -1.124845 |
| 8                | 6             | 0                                | -17.644326 | 3.678411  | 1.207132  |
| 9                | 6             | 0                                | -17.503819 | 1.692381  | 3.323143  |
| 10               | 6             | 0                                | -18.643894 | -0.780579 | 2.538639  |
| 11               | 6             | 0                                | -11.755146 | -3.433286 | -4.771802 |
| 12               | 6             | 0                                | -9.739973  | -1.746363 | -3.528922 |
| 13               | 6             | 0                                | -10.548979 | 1.054701  | -3.118753 |
| 14               | 6             | 0                                | -12.03816  | 2.083616  | -5.277848 |
| 15               | 6             | 0                                | -7.433185  | -1.507092 | -5.305805 |
| 16               | 6             | 0                                | -6.329778  | 1.150014  | -4.919587 |
| 17               | 6             | 0                                | -7.962467  | 2.419895  | -2.888768 |
| 18               | 6             | 0                                | -8.015913  | 5.30192   | -2.970854 |
| 19               | 6             | 0                                | -9.561929  | 6.382273  | -0.797924 |
| 20               | 6             | 0                                | -5.353101  | 6.397744  | -2.935712 |
| 21               | 6             | 0                                | -8.908167  | -2.899544 | -1.015801 |
| 22               | 6             | 0                                | -16.471183 | 7.062559  | -3.315156 |
| 23               | 6             | 0                                | -17.381587 | -2.600359 | -6.213468 |
| 24               | 6             | 0                                | -21.463466 | -0.818142 | 2.321929  |
| 25               | 1             | 0                                | -11.612283 | 1.246998  | -1.37822  |
| 26               | 1             | 0                                | -15.14237  | -2.462496 | 2.122401  |
| 27               | 1             | 0                                | -19.684917 | -5.873648 | 1.546252  |
| 28               | 1             | 0                                | -16.546773 | -6.574489 | 0.887152  |
| 29               | 1             | 0                                | -19.308414 | -6.473703 | -2.959605 |
| 30               | 1             | 0                                | -20.117955 | -3.365252 | -2.291812 |
| 31               | 1             | 0                                | -13.5941   | -4.982682 | -1.437044 |

|    |   |   |            |           |           |
|----|---|---|------------|-----------|-----------|
| 32 | 1 | 0 | -14.805822 | 4.15852   | -7.071533 |
| 33 | 1 | 0 | -15.723406 | 0.914411  | -1.216496 |
| 34 | 1 | 0 | -19.630879 | 4.053566  | 0.771909  |
| 35 | 1 | 0 | -16.900405 | 5.461497  | 1.933405  |
| 36 | 1 | 0 | -18.47016  | 2.439885  | 4.988676  |
| 37 | 1 | 0 | -15.528891 | 1.417021  | 3.844853  |
| 38 | 1 | 0 | -12.305547 | -2.586873 | -6.559831 |
| 39 | 1 | 0 | -10.798172 | -5.205528 | -5.262369 |
| 40 | 1 | 0 | -11.202533 | 1.777564  | -7.12761  |
| 41 | 1 | 0 | -6.064947  | -2.996042 | -4.915268 |
| 42 | 1 | 0 | -8.021761  | -1.768896 | -7.262597 |
| 43 | 1 | 0 | -6.43073   | 2.230317  | -6.672397 |
| 44 | 1 | 0 | -4.346141  | 1.108456  | -4.38002  |
| 45 | 1 | 0 | -7.201827  | 1.908263  | -1.03749  |
| 46 | 1 | 0 | -8.917508  | 5.868096  | -4.742813 |
| 47 | 1 | 0 | -11.497454 | 5.699375  | -0.817647 |
| 48 | 1 | 0 | -8.729621  | 5.858471  | 1.016459  |
| 49 | 1 | 0 | -9.614842  | 8.440424  | -0.879791 |
| 50 | 1 | 0 | -4.245475  | 5.798724  | -4.561973 |
| 51 | 1 | 0 | -4.337671  | 5.813401  | -1.236743 |
| 52 | 1 | 0 | -5.406734  | 8.456811  | -2.943808 |
| 53 | 1 | 0 | -7.213847  | -1.999216 | -0.279679 |
| 54 | 1 | 0 | -10.370113 | -2.73361  | 0.423218  |
| 55 | 1 | 0 | -8.47702   | -4.901873 | -1.247519 |
| 56 | 1 | 0 | -17.643202 | 7.666466  | -1.743137 |
| 57 | 1 | 0 | -14.845334 | 8.326331  | -3.430387 |
| 58 | 1 | 0 | -17.55242  | 7.346488  | -5.050055 |
| 59 | 1 | 0 | -18.357968 | -0.834494 | -5.780549 |
| 60 | 1 | 0 | -15.892852 | -2.165252 | -7.552815 |
| 61 | 1 | 0 | -18.753289 | -3.823967 | -7.153225 |
| 62 | 1 | 0 | -22.333994 | -0.091918 | 4.045739  |
| 63 | 1 | 0 | -22.1193   | 0.390664  | 0.783604  |
| 64 | 1 | 0 | -22.20982  | -2.699284 | 1.981213  |

| CMD1000010_en_ |               | Standard Orientation (Ångstroms) |            |           |           |
|----------------|---------------|----------------------------------|------------|-----------|-----------|
| Center number  | Atomic number | Atomic Type                      | X          | Y         | Z         |
| 0              | 6             | 0                                | -18.711286 | -2.217303 | 0.464901  |
| 1              | 6             | 0                                | -18.408567 | -5.016011 | 0.230479  |
| 2              | 6             | 0                                | -18.403867 | -5.925124 | -2.503921 |
| 3              | 6             | 0                                | -16.191231 | -5.213167 | -4.141106 |
| 4              | 6             | 0                                | -14.34359  | -3.676366 | -3.382794 |
| 5              | 6             | 0                                | -13.915084 | 4.010752  | -5.659762 |

|    |   |   |            |           |           |
|----|---|---|------------|-----------|-----------|
| 6  | 6 | 0 | -15.898153 | 4.704561  | -3.852002 |
| 7  | 6 | 0 | -17.007982 | 2.952663  | -2.405244 |
| 8  | 6 | 0 | -18.953337 | 3.305307  | -0.398511 |
| 9  | 6 | 0 | -18.126641 | 2.149271  | 2.119611  |
| 10 | 6 | 0 | -17.716141 | -0.669753 | 2.184126  |
| 11 | 6 | 0 | -12.026126 | -2.972696 | -4.856104 |
| 12 | 6 | 0 | -10.085085 | -1.417306 | -3.381814 |
| 13 | 6 | 0 | -10.877825 | 1.38276   | -2.94411  |
| 14 | 6 | 0 | -11.854354 | 2.597092  | -5.298003 |
| 15 | 6 | 0 | -7.605914  | -1.11563  | -4.87591  |
| 16 | 6 | 0 | -6.409606  | 1.380589  | -3.976707 |
| 17 | 6 | 0 | -8.33314   | 2.609763  | -2.171662 |
| 18 | 6 | 0 | -8.282207  | 5.488408  | -2.068846 |
| 19 | 6 | 0 | -10.231263 | 6.493014  | -0.205191 |
| 20 | 6 | 0 | -5.658736  | 6.464363  | -1.39243  |
| 21 | 6 | 0 | -9.498026  | -2.721036 | -0.86572  |
| 22 | 6 | 0 | -16.578767 | 7.456888  | -3.891221 |
| 23 | 6 | 0 | -16.234076 | -6.414124 | -6.704432 |
| 24 | 6 | 0 | -16.101921 | -1.536665 | 4.339202  |
| 25 | 1 | 0 | -12.262251 | 1.520655  | -1.43399  |
| 26 | 1 | 0 | -19.862877 | -1.393218 | -1.017055 |
| 27 | 1 | 0 | -19.976399 | -5.962867 | 1.194221  |
| 28 | 1 | 0 | -16.695549 | -5.671356 | 1.167107  |
| 29 | 1 | 0 | -18.551423 | -7.98939  | -2.507586 |
| 30 | 1 | 0 | -20.144794 | -5.279552 | -3.425938 |
| 31 | 1 | 0 | -14.4998   | -2.859256 | -1.520324 |
| 32 | 1 | 0 | -14.105853 | 4.884212  | -7.512312 |
| 33 | 1 | 0 | -16.415976 | 1.018894  | -2.700701 |
| 34 | 1 | 0 | -20.743873 | 2.454438  | -0.985099 |
| 35 | 1 | 0 | -19.35959  | 5.297129  | -0.086647 |
| 36 | 1 | 0 | -19.503275 | 2.653446  | 3.582554  |
| 37 | 1 | 0 | -16.369411 | 3.071471  | 2.699682  |
| 38 | 1 | 0 | -12.546348 | -1.928514 | -6.560451 |
| 39 | 1 | 0 | -11.07919  | -4.687585 | -5.51864  |
| 40 | 1 | 0 | -10.617914 | 2.41596   | -6.92436  |
| 41 | 1 | 0 | -6.374456  | -2.740937 | -4.587277 |
| 42 | 1 | 0 | -8.004859  | -1.043962 | -6.896036 |
| 43 | 1 | 0 | -6.049042  | 2.623003  | -5.579619 |
| 44 | 1 | 0 | -4.596092  | 1.086625  | -3.053302 |
| 45 | 1 | 0 | -7.935429  | 1.957638  | -0.253628 |
| 46 | 1 | 0 | -8.768318  | 6.20111   | -3.948171 |
| 47 | 1 | 0 | -12.134228 | 5.880605  | -0.679127 |
| 48 | 1 | 0 | -9.817614  | 5.830529  | 1.704991  |

|    |   |   |            |           |           |
|----|---|---|------------|-----------|-----------|
| 49 | 1 | 0 | -10.22192  | 8.552435  | -0.159507 |
| 50 | 1 | 0 | -5.640847  | 8.522022  | -1.296589 |
| 51 | 1 | 0 | -4.240345  | 5.895271  | -2.768746 |
| 52 | 1 | 0 | -5.061974  | 5.75442   | 0.450956  |
| 53 | 1 | 0 | -7.779783  | -1.995989 | -0.003867 |
| 54 | 1 | 0 | -11.017343 | -2.501621 | 0.503851  |
| 55 | 1 | 0 | -9.222498  | -4.740756 | -1.164653 |
| 56 | 1 | 0 | -14.9393   | 8.630128  | -3.461421 |
| 57 | 1 | 0 | -17.209343 | 8.006076  | -5.778534 |
| 58 | 1 | 0 | -18.074161 | 7.939715  | -2.573265 |
| 59 | 1 | 0 | -16.210189 | -8.473915 | -6.559697 |
| 60 | 1 | 0 | -17.96882  | -5.925174 | -7.711851 |
| 61 | 1 | 0 | -14.650298 | -5.846378 | -7.878833 |
| 62 | 1 | 0 | -14.201854 | -0.739592 | 4.20235   |
| 63 | 1 | 0 | -16.874745 | -0.871708 | 6.13458   |
| 64 | 1 | 0 | -15.928634 | -3.577215 | 4.458081  |

| CMD1000010_tddft_ |               | Standard Orientation (Ångstroms) |            |           |           |
|-------------------|---------------|----------------------------------|------------|-----------|-----------|
| Center number     | Atomic number | Atomic Type                      | X          | Y         | Z         |
| 0                 | 6             | 0                                | -18.711286 | -2.217303 | 0.464901  |
| 1                 | 6             | 0                                | -18.408567 | -5.016011 | 0.230479  |
| 2                 | 6             | 0                                | -18.403867 | -5.925124 | -2.503921 |
| 3                 | 6             | 0                                | -16.191231 | -5.213167 | -4.141106 |
| 4                 | 6             | 0                                | -14.34359  | -3.676366 | -3.382794 |
| 5                 | 6             | 0                                | -13.915084 | 4.010752  | -5.659762 |
| 6                 | 6             | 0                                | -15.898153 | 4.704561  | -3.852002 |
| 7                 | 6             | 0                                | -17.007982 | 2.952663  | -2.405244 |
| 8                 | 6             | 0                                | -18.953337 | 3.305307  | -0.398511 |
| 9                 | 6             | 0                                | -18.126641 | 2.149271  | 2.119611  |
| 10                | 6             | 0                                | -17.716141 | -0.669753 | 2.184126  |
| 11                | 6             | 0                                | -12.026126 | -2.972696 | -4.856104 |
| 12                | 6             | 0                                | -10.085085 | -1.417306 | -3.381814 |
| 13                | 6             | 0                                | -10.877825 | 1.38276   | -2.94411  |
| 14                | 6             | 0                                | -11.854354 | 2.597092  | -5.298003 |
| 15                | 6             | 0                                | -7.605914  | -1.11563  | -4.87591  |
| 16                | 6             | 0                                | -6.409606  | 1.380589  | -3.976707 |
| 17                | 6             | 0                                | -8.33314   | 2.609763  | -2.171662 |
| 18                | 6             | 0                                | -8.282207  | 5.488408  | -2.068846 |
| 19                | 6             | 0                                | -10.231263 | 6.493014  | -0.205191 |
| 20                | 6             | 0                                | -5.658736  | 6.464363  | -1.39243  |
| 21                | 6             | 0                                | -9.498026  | -2.721036 | -0.86572  |
| 22                | 6             | 0                                | -16.578767 | 7.456888  | -3.891221 |

|    |   |   |            |           |           |
|----|---|---|------------|-----------|-----------|
| 23 | 6 | 0 | -16.234076 | -6.414124 | -6.704432 |
| 24 | 6 | 0 | -16.101921 | -1.536665 | 4.339202  |
| 25 | 1 | 0 | -12.262251 | 1.520655  | -1.43399  |
| 26 | 1 | 0 | -19.862877 | -1.393218 | -1.017055 |
| 27 | 1 | 0 | -19.976399 | -5.962867 | 1.194221  |
| 28 | 1 | 0 | -16.695549 | -5.671356 | 1.167107  |
| 29 | 1 | 0 | -18.551423 | -7.98939  | -2.507586 |
| 30 | 1 | 0 | -20.144794 | -5.279552 | -3.425938 |
| 31 | 1 | 0 | -14.4998   | -2.859256 | -1.520324 |
| 32 | 1 | 0 | -14.105853 | 4.884212  | -7.512312 |
| 33 | 1 | 0 | -16.415976 | 1.018894  | -2.700701 |
| 34 | 1 | 0 | -20.743873 | 2.454438  | -0.985099 |
| 35 | 1 | 0 | -19.35959  | 5.297129  | -0.086647 |
| 36 | 1 | 0 | -19.503275 | 2.653446  | 3.582554  |
| 37 | 1 | 0 | -16.369411 | 3.071471  | 2.699682  |
| 38 | 1 | 0 | -12.546348 | -1.928514 | -6.560451 |
| 39 | 1 | 0 | -11.07919  | -4.687585 | -5.51864  |
| 40 | 1 | 0 | -10.617914 | 2.41596   | -6.92436  |
| 41 | 1 | 0 | -6.374456  | -2.740937 | -4.587277 |
| 42 | 1 | 0 | -8.004859  | -1.043962 | -6.896036 |
| 43 | 1 | 0 | -6.049042  | 2.623003  | -5.579619 |
| 44 | 1 | 0 | -4.596092  | 1.086625  | -3.053302 |
| 45 | 1 | 0 | -7.935429  | 1.957638  | -0.253628 |
| 46 | 1 | 0 | -8.768318  | 6.20111   | -3.948171 |
| 47 | 1 | 0 | -12.134228 | 5.880605  | -0.679127 |
| 48 | 1 | 0 | -9.817614  | 5.830529  | 1.704991  |
| 49 | 1 | 0 | -10.22192  | 8.552435  | -0.159507 |
| 50 | 1 | 0 | -5.640847  | 8.522022  | -1.296589 |
| 51 | 1 | 0 | -4.240345  | 5.895271  | -2.768746 |
| 52 | 1 | 0 | -5.061974  | 5.75442   | 0.450956  |
| 53 | 1 | 0 | -7.779783  | -1.995989 | -0.003867 |
| 54 | 1 | 0 | -11.017343 | -2.501621 | 0.503851  |
| 55 | 1 | 0 | -9.222498  | -4.740756 | -1.164653 |
| 56 | 1 | 0 | -14.9393   | 8.630128  | -3.461421 |
| 57 | 1 | 0 | -17.209343 | 8.006076  | -5.778534 |
| 58 | 1 | 0 | -18.074161 | 7.939715  | -2.573265 |
| 59 | 1 | 0 | -16.210189 | -8.473915 | -6.559697 |
| 60 | 1 | 0 | -17.96882  | -5.925174 | -7.711851 |
| 61 | 1 | 0 | -14.650298 | -5.846378 | -7.878833 |
| 62 | 1 | 0 | -14.201854 | -0.739592 | 4.20235   |
| 63 | 1 | 0 | -16.874745 | -0.871708 | 6.13458   |
| 64 | 1 | 0 | -15.928634 | -3.577215 | 4.458081  |



| CMD1000011_en_ |               | Standard Orientation (Ångstroms) |            |           |           |
|----------------|---------------|----------------------------------|------------|-----------|-----------|
| Center number  | Atomic number | Atomic Type                      | X          | Y         | Z         |
| 0              | 6             | 0                                | -19.233764 | -1.896275 | 0.193732  |
| 1              | 6             | 0                                | -19.591714 | -4.570838 | -0.599671 |
| 2              | 6             | 0                                | -18.783589 | -4.966319 | -3.369599 |
| 3              | 6             | 0                                | -15.976244 | -5.000602 | -3.807516 |
| 4              | 6             | 0                                | -14.807432 | -3.036655 | -4.882441 |
| 5              | 6             | 0                                | -14.062918 | 4.222429  | -5.597124 |
| 6              | 6             | 0                                | -15.861902 | 4.911605  | -3.601762 |
| 7              | 6             | 0                                | -16.770452 | 3.199668  | -1.97767  |
| 8              | 6             | 0                                | -18.396312 | 3.606518  | 0.291891  |
| 9              | 6             | 0                                | -17.599518 | 1.877402  | 2.46516   |
| 10             | 6             | 0                                | -17.800682 | -0.93427  | 2.027269  |
| 11             | 6             | 0                                | -12.090858 | -2.797746 | -5.611326 |
| 12             | 6             | 0                                | -10.300275 | -1.419857 | -3.768828 |
| 13             | 6             | 0                                | -10.991619 | 1.382974  | -3.194504 |
| 14             | 6             | 0                                | -12.013888 | 2.748912  | -5.437461 |
| 15             | 6             | 0                                | -7.638347  | -1.226103 | -4.965278 |
| 16             | 6             | 0                                | -6.513288  | 1.327926  | -4.170114 |
| 17             | 6             | 0                                | -8.420908  | 2.507639  | -2.341752 |
| 18             | 6             | 0                                | -8.298856  | 5.377119  | -2.095667 |
| 19             | 6             | 0                                | -10.177597 | 6.342141  | -0.140726 |
| 20             | 6             | 0                                | -5.638019  | 6.260576  | -1.43545  |
| 21             | 6             | 0                                | -10.194734 | -2.890971 | -1.292213 |
| 22             | 6             | 0                                | -16.567579 | 7.658235  | -3.577513 |
| 23             | 6             | 0                                | -14.674481 | -7.377298 | -2.998261 |
| 24             | 6             | 0                                | -16.264202 | -2.478483 | 3.830439  |
| 25             | 1             | 0                                | -12.3407   | 1.46193   | -1.655805 |
| 26             | 1             | 0                                | -20.260517 | -0.576615 | -0.992385 |
| 27             | 1             | 0                                | -21.598614 | -5.050513 | -0.458337 |
| 28             | 1             | 0                                | -18.604832 | -5.893437 | 0.626925  |
| 29             | 1             | 0                                | -19.577211 | -6.758184 | -4.026117 |
| 30             | 1             | 0                                | -19.646897 | -3.488934 | -4.519179 |
| 31             | 1             | 0                                | -15.966851 | -1.423678 | -5.387278 |
| 32             | 1             | 0                                | -14.362904 | 5.180655  | -7.391063 |
| 33             | 1             | 0                                | -16.241846 | 1.25281   | -2.281752 |
| 34             | 1             | 0                                | -20.389198 | 3.279394  | -0.154283 |
| 35             | 1             | 0                                | -18.289633 | 5.556517  | 0.942416  |
| 36             | 1             | 0                                | -18.683573 | 2.365739  | 4.159638  |
| 37             | 1             | 0                                | -15.634786 | 2.308795  | 2.94625   |
| 38             | 1             | 0                                | -12.016687 | -1.812953 | -7.422037 |
| 39             | 1             | 0                                | -11.269285 | -4.659151 | -5.955696 |

|    |   |   |            |           |           |
|----|---|---|------------|-----------|-----------|
| 40 | 1 | 0 | -10.874311 | 2.605872  | -7.138448 |
| 41 | 1 | 0 | -6.466838  | -2.815154 | -4.378654 |
| 42 | 1 | 0 | -7.778841  | -1.343487 | -7.016907 |
| 43 | 1 | 0 | -6.276581  | 2.551352  | -5.812199 |
| 44 | 1 | 0 | -4.653599  | 1.136009  | -3.314777 |
| 45 | 1 | 0 | -8.050964  | 1.743272  | -0.457253 |
| 46 | 1 | 0 | -8.807509  | 6.188814  | -3.928334 |
| 47 | 1 | 0 | -12.108116 | 5.810222  | -0.594624 |
| 48 | 1 | 0 | -9.737425  | 5.57788   | 1.725495  |
| 49 | 1 | 0 | -10.106837 | 8.395992  | 0.002797  |
| 50 | 1 | 0 | -5.57988   | 8.306536  | -1.203292 |
| 51 | 1 | 0 | -4.271841  | 5.762799  | -2.889546 |
| 52 | 1 | 0 | -5.001643  | 5.417691  | 0.337364  |
| 53 | 1 | 0 | -8.912266  | -2.029482 | 0.063549  |
| 54 | 1 | 0 | -12.059797 | -2.999102 | -0.433847 |
| 55 | 1 | 0 | -9.536848  | -4.815344 | -1.61669  |
| 56 | 1 | 0 | -17.96102  | 8.113046  | -2.141604 |
| 57 | 1 | 0 | -14.910885 | 8.848254  | -3.271934 |
| 58 | 1 | 0 | -17.353303 | 8.209753  | -5.404268 |
| 59 | 1 | 0 | -14.69446  | -7.577751 | -0.944749 |
| 60 | 1 | 0 | -15.641811 | -9.035163 | -3.755755 |
| 61 | 1 | 0 | -12.71359  | -7.456574 | -3.590745 |
| 62 | 1 | 0 | -16.48372  | -4.500126 | 3.558923  |
| 63 | 1 | 0 | -14.258244 | -2.029284 | 3.647643  |
| 64 | 1 | 0 | -16.778471 | -2.046975 | 5.782818  |

| CMD1000011_tddft_ |               | Standard Orientation (Ångstroms) |            |           |           |
|-------------------|---------------|----------------------------------|------------|-----------|-----------|
| Center number     | Atomic number | Atomic Type                      | X          | Y         | Z         |
| 0                 | 6             | 0                                | -19.233764 | -1.896275 | 0.193732  |
| 1                 | 6             | 0                                | -19.591714 | -4.570838 | -0.599671 |
| 2                 | 6             | 0                                | -18.783589 | -4.966319 | -3.369599 |
| 3                 | 6             | 0                                | -15.976244 | -5.000602 | -3.807516 |
| 4                 | 6             | 0                                | -14.807432 | -3.036655 | -4.882441 |
| 5                 | 6             | 0                                | -14.062918 | 4.222429  | -5.597124 |
| 6                 | 6             | 0                                | -15.861902 | 4.911605  | -3.601762 |
| 7                 | 6             | 0                                | -16.770452 | 3.199668  | -1.97767  |
| 8                 | 6             | 0                                | -18.396312 | 3.606518  | 0.291891  |
| 9                 | 6             | 0                                | -17.599518 | 1.877402  | 2.46516   |
| 10                | 6             | 0                                | -17.800682 | -0.93427  | 2.027269  |
| 11                | 6             | 0                                | -12.090858 | -2.797746 | -5.611326 |
| 12                | 6             | 0                                | -10.300275 | -1.419857 | -3.768828 |
| 13                | 6             | 0                                | -10.991619 | 1.382974  | -3.194504 |

|    |   |   |            |           |           |
|----|---|---|------------|-----------|-----------|
| 14 | 6 | 0 | -12.013888 | 2.748912  | -5.437461 |
| 15 | 6 | 0 | -7.638347  | -1.226103 | -4.965278 |
| 16 | 6 | 0 | -6.513288  | 1.327926  | -4.170114 |
| 17 | 6 | 0 | -8.420908  | 2.507639  | -2.341752 |
| 18 | 6 | 0 | -8.298856  | 5.377119  | -2.095667 |
| 19 | 6 | 0 | -10.177597 | 6.342141  | -0.140726 |
| 20 | 6 | 0 | -5.638019  | 6.260576  | -1.43545  |
| 21 | 6 | 0 | -10.194734 | -2.890971 | -1.292213 |
| 22 | 6 | 0 | -16.567579 | 7.658235  | -3.577513 |
| 23 | 6 | 0 | -14.674481 | -7.377298 | -2.998261 |
| 24 | 6 | 0 | -16.264202 | -2.478483 | 3.830439  |
| 25 | 1 | 0 | -12.3407   | 1.46193   | -1.655805 |
| 26 | 1 | 0 | -20.260517 | -0.576615 | -0.992385 |
| 27 | 1 | 0 | -21.598614 | -5.050513 | -0.458337 |
| 28 | 1 | 0 | -18.604832 | -5.893437 | 0.626925  |
| 29 | 1 | 0 | -19.577211 | -6.758184 | -4.026117 |
| 30 | 1 | 0 | -19.646897 | -3.488934 | -4.519179 |
| 31 | 1 | 0 | -15.966851 | -1.423678 | -5.387278 |
| 32 | 1 | 0 | -14.362904 | 5.180655  | -7.391063 |
| 33 | 1 | 0 | -16.241846 | 1.25281   | -2.281752 |
| 34 | 1 | 0 | -20.389198 | 3.279394  | -0.154283 |
| 35 | 1 | 0 | -18.289633 | 5.556517  | 0.942416  |
| 36 | 1 | 0 | -18.683573 | 2.365739  | 4.159638  |
| 37 | 1 | 0 | -15.634786 | 2.308795  | 2.94625   |
| 38 | 1 | 0 | -12.016687 | -1.812953 | -7.422037 |
| 39 | 1 | 0 | -11.269285 | -4.659151 | -5.955696 |
| 40 | 1 | 0 | -10.874311 | 2.605872  | -7.138448 |
| 41 | 1 | 0 | -6.466838  | -2.815154 | -4.378654 |
| 42 | 1 | 0 | -7.778841  | -1.343487 | -7.016907 |
| 43 | 1 | 0 | -6.276581  | 2.551352  | -5.812199 |
| 44 | 1 | 0 | -4.653599  | 1.136009  | -3.314777 |
| 45 | 1 | 0 | -8.050964  | 1.743272  | -0.457253 |
| 46 | 1 | 0 | -8.807509  | 6.188814  | -3.928334 |
| 47 | 1 | 0 | -12.108116 | 5.810222  | -0.594624 |
| 48 | 1 | 0 | -9.737425  | 5.57788   | 1.725495  |
| 49 | 1 | 0 | -10.106837 | 8.395992  | 0.002797  |
| 50 | 1 | 0 | -5.57988   | 8.306536  | -1.203292 |
| 51 | 1 | 0 | -4.271841  | 5.762799  | -2.889546 |
| 52 | 1 | 0 | -5.001643  | 5.417691  | 0.337364  |
| 53 | 1 | 0 | -8.912266  | -2.029482 | 0.063549  |
| 54 | 1 | 0 | -12.059797 | -2.999102 | -0.433847 |
| 55 | 1 | 0 | -9.536848  | -4.815344 | -1.61669  |
| 56 | 1 | 0 | -17.96102  | 8.113046  | -2.141604 |

|    |   |   |            |           |           |
|----|---|---|------------|-----------|-----------|
| 57 | 1 | 0 | -14.910885 | 8.848254  | -3.271934 |
| 58 | 1 | 0 | -17.353303 | 8.209753  | -5.404268 |
| 59 | 1 | 0 | -14.69446  | -7.577751 | -0.944749 |
| 60 | 1 | 0 | -15.641811 | -9.035163 | -3.755755 |
| 61 | 1 | 0 | -12.71359  | -7.456574 | -3.590745 |
| 62 | 1 | 0 | -16.48372  | -4.500126 | 3.558923  |
| 63 | 1 | 0 | -14.258244 | -2.029284 | 3.647643  |
| 64 | 1 | 0 | -16.778471 | -2.046975 | 5.782818  |

| CMD1000012_en_ |               | Standard Orientation (Ångstroms) |            |           |           |
|----------------|---------------|----------------------------------|------------|-----------|-----------|
| Center number  | Atomic number | Atomic Type                      | X          | Y         | Z         |
| 0              | 6             | 0                                | -18.799717 | -2.119399 | 0.479031  |
| 1              | 6             | 0                                | -18.513483 | -4.921864 | 0.264671  |
| 2              | 6             | 0                                | -18.52407  | -5.85621  | -2.46172  |
| 3              | 6             | 0                                | -16.30369  | -5.187609 | -4.107232 |
| 4              | 6             | 0                                | -14.466475 | -3.620961 | -3.386266 |
| 5              | 6             | 0                                | -13.904431 | 4.066854  | -5.631324 |
| 6              | 6             | 0                                | -15.886526 | 4.780804  | -3.829671 |
| 7              | 6             | 0                                | -17.041936 | 3.034804  | -2.411466 |
| 8              | 6             | 0                                | -18.998684 | 3.403636  | -0.418463 |
| 9              | 6             | 0                                | -18.192655 | 2.254361  | 2.109823  |
| 10             | 6             | 0                                | -17.796741 | -0.566446 | 2.188886  |
| 11             | 6             | 0                                | -12.140357 | -2.953635 | -4.862043 |
| 12             | 6             | 0                                | -10.17329  | -1.441413 | -3.377741 |
| 13             | 6             | 0                                | -10.920852 | 1.368549  | -2.922083 |
| 14             | 6             | 0                                | -11.869812 | 2.615527  | -5.270898 |
| 15             | 6             | 0                                | -7.687396  | -1.171237 | -4.866038 |
| 16             | 6             | 0                                | -6.45092   | 1.298017  | -3.946082 |
| 17             | 6             | 0                                | -8.35712   | 2.546798  | -2.135784 |
| 18             | 6             | 0                                | -8.256696  | 5.423469  | -2.011307 |
| 19             | 6             | 0                                | -10.190882 | 6.445718  | -0.141722 |
| 20             | 6             | 0                                | -5.617749  | 6.347365  | -1.321801 |
| 21             | 6             | 0                                | -9.610725  | -2.772448 | -0.870643 |
| 22             | 6             | 0                                | -16.512323 | 7.546277  | -3.844493 |
| 23             | 6             | 0                                | -16.324438 | -6.471979 | -6.630166 |
| 24             | 6             | 0                                | -16.187076 | -1.429163 | 4.349294  |
| 25             | 1             | 0                                | -12.307678 | 1.519732  | -1.415233 |
| 26             | 1             | 0                                | -19.94791  | -1.298902 | -1.007764 |
| 27             | 1             | 0                                | -20.083532 | -5.850908 | 1.242111  |
| 28             | 1             | 0                                | -16.800643 | -5.579545 | 1.199741  |
| 29             | 1             | 0                                | -18.696783 | -7.918311 | -2.445432 |
| 30             | 1             | 0                                | -20.258349 | -5.198815 | -3.387818 |

|    |   |   |            |           |           |
|----|---|---|------------|-----------|-----------|
| 31 | 1 | 0 | -14.638823 | -2.742239 | -1.553377 |
| 32 | 1 | 0 | -14.073033 | 4.95574   | -7.478757 |
| 33 | 1 | 0 | -16.482918 | 1.093622  | -2.721371 |
| 34 | 1 | 0 | -20.787296 | 2.555583  | -1.014194 |
| 35 | 1 | 0 | -19.400023 | 5.397944  | -0.117513 |
| 36 | 1 | 0 | -19.574722 | 2.772635  | 3.562596  |
| 37 | 1 | 0 | -16.433589 | 3.169149  | 2.695585  |
| 38 | 1 | 0 | -12.644962 | -1.888321 | -6.558779 |
| 39 | 1 | 0 | -11.225409 | -4.679989 | -5.53744  |
| 40 | 1 | 0 | -10.62996  | 2.425255  | -6.893562 |
| 41 | 1 | 0 | -6.48484   | -2.819559 | -4.586673 |
| 42 | 1 | 0 | -8.080883  | -1.079359 | -6.886394 |
| 43 | 1 | 0 | -6.063618  | 2.545508  | -5.538882 |
| 44 | 1 | 0 | -4.645009  | 0.965826  | -3.020523 |
| 45 | 1 | 0 | -7.973328  | 1.874534  | -0.222176 |
| 46 | 1 | 0 | -8.727588  | 6.159025  | -3.885369 |
| 47 | 1 | 0 | -12.102207 | 5.863034  | -0.619297 |
| 48 | 1 | 0 | -9.787303  | 5.766507  | 1.764815  |
| 49 | 1 | 0 | -10.152711 | 8.504508  | -0.084144 |
| 50 | 1 | 0 | -5.562588  | 8.403537  | -1.20904  |
| 51 | 1 | 0 | -4.20683   | 5.763851  | -2.6998   |
| 52 | 1 | 0 | -5.037975  | 5.611465  | 0.516836  |
| 53 | 1 | 0 | -7.890145  | -2.070852 | 0.005394  |
| 54 | 1 | 0 | -11.135674 | -2.5514   | 0.492232  |
| 55 | 1 | 0 | -9.353215  | -4.791823 | -1.187269 |
| 56 | 1 | 0 | -18.024647 | 8.040746  | -2.550378 |
| 57 | 1 | 0 | -14.859447 | 8.680301  | -3.363786 |
| 58 | 1 | 0 | -17.092081 | 8.134643  | -5.735973 |
| 59 | 1 | 0 | -14.795378 | -5.857185 | -7.85246  |
| 60 | 1 | 0 | -16.183526 | -8.521962 | -6.419776 |
| 61 | 1 | 0 | -18.101043 | -6.114692 | -7.619148 |
| 62 | 1 | 0 | -16.950008 | -0.740446 | 6.139896  |
| 63 | 1 | 0 | -16.032991 | -3.470159 | 4.486194  |
| 64 | 1 | 0 | -14.279727 | -0.651469 | 4.202185  |

| CMD1000012_tddft_ |               | Standard Orientation (Ångstroms) |            |           |           |
|-------------------|---------------|----------------------------------|------------|-----------|-----------|
| Center number     | Atomic number | Atomic Type                      | X          | Y         | Z         |
| 0                 | 6             | 0                                | -18.799717 | -2.119399 | 0.479031  |
| 1                 | 6             | 0                                | -18.513483 | -4.921864 | 0.264671  |
| 2                 | 6             | 0                                | -18.52407  | -5.85621  | -2.46172  |
| 3                 | 6             | 0                                | -16.30369  | -5.187609 | -4.107232 |
| 4                 | 6             | 0                                | -14.466475 | -3.620961 | -3.386266 |

|    |   |   |            |           |           |
|----|---|---|------------|-----------|-----------|
| 5  | 6 | 0 | -13.904431 | 4.066854  | -5.631324 |
| 6  | 6 | 0 | -15.886526 | 4.780804  | -3.829671 |
| 7  | 6 | 0 | -17.041936 | 3.034804  | -2.411466 |
| 8  | 6 | 0 | -18.998684 | 3.403636  | -0.418463 |
| 9  | 6 | 0 | -18.192655 | 2.254361  | 2.109823  |
| 10 | 6 | 0 | -17.796741 | -0.566446 | 2.188886  |
| 11 | 6 | 0 | -12.140357 | -2.953635 | -4.862043 |
| 12 | 6 | 0 | -10.17329  | -1.441413 | -3.377741 |
| 13 | 6 | 0 | -10.920852 | 1.368549  | -2.922083 |
| 14 | 6 | 0 | -11.869812 | 2.615527  | -5.270898 |
| 15 | 6 | 0 | -7.687396  | -1.171237 | -4.866038 |
| 16 | 6 | 0 | -6.45092   | 1.298017  | -3.946082 |
| 17 | 6 | 0 | -8.35712   | 2.546798  | -2.135784 |
| 18 | 6 | 0 | -8.256696  | 5.423469  | -2.011307 |
| 19 | 6 | 0 | -10.190882 | 6.445718  | -0.141722 |
| 20 | 6 | 0 | -5.617749  | 6.347365  | -1.321801 |
| 21 | 6 | 0 | -9.610725  | -2.772448 | -0.870643 |
| 22 | 6 | 0 | -16.512323 | 7.546277  | -3.844493 |
| 23 | 6 | 0 | -16.324438 | -6.471979 | -6.630166 |
| 24 | 6 | 0 | -16.187076 | -1.429163 | 4.349294  |
| 25 | 1 | 0 | -12.307678 | 1.519732  | -1.415233 |
| 26 | 1 | 0 | -19.94791  | -1.298902 | -1.007764 |
| 27 | 1 | 0 | -20.083532 | -5.850908 | 1.242111  |
| 28 | 1 | 0 | -16.800643 | -5.579545 | 1.199741  |
| 29 | 1 | 0 | -18.696783 | -7.918311 | -2.445432 |
| 30 | 1 | 0 | -20.258349 | -5.198815 | -3.387818 |
| 31 | 1 | 0 | -14.638823 | -2.742239 | -1.553377 |
| 32 | 1 | 0 | -14.073033 | 4.95574   | -7.478757 |
| 33 | 1 | 0 | -16.482918 | 1.093622  | -2.721371 |
| 34 | 1 | 0 | -20.787296 | 2.555583  | -1.014194 |
| 35 | 1 | 0 | -19.400023 | 5.397944  | -0.117513 |
| 36 | 1 | 0 | -19.574722 | 2.772635  | 3.562596  |
| 37 | 1 | 0 | -16.433589 | 3.169149  | 2.695585  |
| 38 | 1 | 0 | -12.644962 | -1.888321 | -6.558779 |
| 39 | 1 | 0 | -11.225409 | -4.679989 | -5.53744  |
| 40 | 1 | 0 | -10.62996  | 2.425255  | -6.893562 |
| 41 | 1 | 0 | -6.48484   | -2.819559 | -4.586673 |
| 42 | 1 | 0 | -8.080883  | -1.079359 | -6.886394 |
| 43 | 1 | 0 | -6.063618  | 2.545508  | -5.538882 |
| 44 | 1 | 0 | -4.645009  | 0.965826  | -3.020523 |
| 45 | 1 | 0 | -7.973328  | 1.874534  | -0.222176 |
| 46 | 1 | 0 | -8.727588  | 6.159025  | -3.885369 |
| 47 | 1 | 0 | -12.102207 | 5.863034  | -0.619297 |

|    |   |   |            |           |           |
|----|---|---|------------|-----------|-----------|
| 48 | 1 | 0 | -9.787303  | 5.766507  | 1.764815  |
| 49 | 1 | 0 | -10.152711 | 8.504508  | -0.084144 |
| 50 | 1 | 0 | -5.562588  | 8.403537  | -1.20904  |
| 51 | 1 | 0 | -4.20683   | 5.763851  | -2.6998   |
| 52 | 1 | 0 | -5.037975  | 5.611465  | 0.516836  |
| 53 | 1 | 0 | -7.890145  | -2.070852 | 0.005394  |
| 54 | 1 | 0 | -11.135674 | -2.5514   | 0.492232  |
| 55 | 1 | 0 | -9.353215  | -4.791823 | -1.187269 |
| 56 | 1 | 0 | -18.024647 | 8.040746  | -2.550378 |
| 57 | 1 | 0 | -14.859447 | 8.680301  | -3.363786 |
| 58 | 1 | 0 | -17.092081 | 8.134643  | -5.735973 |
| 59 | 1 | 0 | -14.795378 | -5.857185 | -7.85246  |
| 60 | 1 | 0 | -16.183526 | -8.521962 | -6.419776 |
| 61 | 1 | 0 | -18.101043 | -6.114692 | -7.619148 |
| 62 | 1 | 0 | -16.950008 | -0.740446 | 6.139896  |
| 63 | 1 | 0 | -16.032991 | -3.470159 | 4.486194  |
| 64 | 1 | 0 | -14.279727 | -0.651469 | 4.202185  |

**Table S11. Gibbs free energies<sup>a</sup> and equilibrium populations<sup>b</sup> of low-energy conformers of *ent-1*.**

| Conformers         | $\Delta G$ | P(%) / 100 | Single point energy (a.u.) |
|--------------------|------------|------------|----------------------------|
| ENT-1000002_tddft_ | 9e-05      | 43.4       | -976.5736758555            |
| ENT-1000006_tddft_ | 0.00299    | 2.01       | -976.570779013             |
| ENT-1000007_tddft_ | 0.00327    | 1.5        | -976.5705021681            |
| ENT-1000008_tddft_ | 0.0        | 47.87      | -976.5737684017            |
| ENT-1000013_tddft_ | 0.00209    | 5.21       | -976.5716757577            |

<sup>a</sup>wB97M-V/def2-TZVP, in kcal/mol.

<sup>b</sup>From  $\Delta G$  values at 298.15K.

**Table S12. Cartesian coordinates for the low-energy reoptimized random research conformers of *ent-1* at PBE0-D3(BJ)/def2-SVP level of theory in methanol.**

| ENT-1000002_en_ |               | Standard Orientation (Ångstroms) |            |           |           |
|-----------------|---------------|----------------------------------|------------|-----------|-----------|
| Center number   | Atomic number | Atomic Type                      | X          | Y         | Z         |
| 0               | 6             | 0                                | -22.015612 | 1.191386  | -0.728154 |
| 1               | 6             | 0                                | -23.407946 | -0.698554 | -2.292649 |
| 2               | 6             | 0                                | -22.361658 | -3.39411  | -1.94203  |
| 3               | 6             | 0                                | -19.724957 | -3.773447 | -2.923934 |
| 4               | 6             | 0                                | -17.787119 | -4.066436 | -1.331758 |
| 5               | 6             | 0                                | -14.322762 | -2.778991 | 5.029269  |
| 6               | 6             | 0                                | -16.053939 | -0.839885 | 5.987236  |
| 7               | 6             | 0                                | -17.819574 | 0.279955  | 4.563078  |
| 8               | 6             | 0                                | -19.52921  | 2.392563  | 5.343305  |
| 9               | 6             | 0                                | -20.846838 | 3.627673  | 3.075614  |
| 10              | 6             | 0                                | -22.535492 | 1.849467  | 1.651383  |
| 11              | 6             | 0                                | -15.081353 | -4.540711 | -1.961295 |
| 12              | 6             | 0                                | -13.275951 | -2.253418 | -1.887533 |
| 13              | 6             | 0                                | -12.967195 | -0.985849 | 0.753384  |
| 14              | 6             | 0                                | -13.015529 | -2.846102 | 2.865882  |
| 15              | 6             | 0                                | -10.563493 | -3.139651 | -2.540754 |
| 16              | 6             | 0                                | -8.730474  | -1.636507 | -0.869506 |
| 17              | 6             | 0                                | -10.345515 | 0.309584  | 0.531839  |
| 18              | 6             | 0                                | -9.216261  | 1.330447  | 2.979784  |
| 19              | 6             | 0                                | -10.908822 | 3.342392  | 4.148584  |
| 20              | 6             | 0                                | -6.568428  | 2.380624  | 2.555131  |
| 21              | 6             | 0                                | -14.175672 | -0.284525 | -3.79148  |
| 22              | 6             | 0                                | -15.672657 | -0.212313 | 8.728587  |
| 23              | 6             | 0                                | -19.488408 | -3.786717 | -5.742925 |
| 24              | 6             | 0                                | -24.722041 | 0.817564  | 3.121055  |
| 25              | 1             | 0                                | -14.422108 | 0.429531  | 1.035155  |
| 26              | 1             | 0                                | -20.342831 | 2.007196  | -1.591071 |
| 27              | 1             | 0                                | -23.312754 | -0.171401 | -4.283488 |
| 28              | 1             | 0                                | -25.410411 | -0.723518 | -1.809192 |
| 29              | 1             | 0                                | -23.633313 | -4.710317 | -2.906022 |
| 30              | 1             | 0                                | -22.429725 | -3.855227 | 0.064014  |



|    |   |   |            |           |           |
|----|---|---|------------|-----------|-----------|
| 31 | 1 | 0 | -18.209485 | -4.010352 | 0.673289  |
| 32 | 1 | 0 | -13.922947 | -4.284686 | 6.370894  |
| 33 | 1 | 0 | -18.075088 | -0.380169 | 2.646061  |
| 34 | 1 | 0 | -18.469774 | 3.843829  | 6.358003  |
| 35 | 1 | 0 | -20.960977 | 1.725576  | 6.677527  |
| 36 | 1 | 0 | -19.414975 | 4.392401  | 1.805087  |
| 37 | 1 | 0 | -21.952616 | 5.23315   | 3.763697  |
| 38 | 1 | 0 | -14.913882 | -5.371011 | -3.841169 |
| 39 | 1 | 0 | -14.361546 | -5.962803 | -0.652698 |
| 40 | 1 | 0 | -11.727685 | -4.429979 | 2.654106  |
| 41 | 1 | 0 | -10.187222 | -2.867873 | -4.547151 |
| 42 | 1 | 0 | -10.374574 | -5.160497 | -2.190419 |
| 43 | 1 | 0 | -7.805265  | -2.882163 | 0.489551  |
| 44 | 1 | 0 | -7.229025  | -0.745352 | -1.955039 |
| 45 | 1 | 0 | -10.609014 | 1.935693  | -0.716366 |
| 46 | 1 | 0 | -9.075303  | -0.244598 | 4.311854  |
| 47 | 1 | 0 | -11.11749  | 4.947313  | 2.867818  |
| 48 | 1 | 0 | -10.106643 | 4.056433  | 5.906784  |
| 49 | 1 | 0 | -12.786991 | 2.623275  | 4.559599  |
| 50 | 1 | 0 | -5.806387  | 3.179025  | 4.294244  |
| 51 | 1 | 0 | -5.254884  | 0.935958  | 1.908751  |
| 52 | 1 | 0 | -6.591063  | 3.883788  | 1.141938  |
| 53 | 1 | 0 | -14.248351 | -1.091397 | -5.684557 |
| 54 | 1 | 0 | -16.06496  | 0.380586  | -3.323203 |
| 55 | 1 | 0 | -12.924378 | 1.345627  | -3.872543 |
| 56 | 1 | 0 | -15.631761 | -1.935356 | 9.861821  |
| 57 | 1 | 0 | -17.147967 | 0.999049  | 9.480681  |
| 58 | 1 | 0 | -13.85865  | 0.723505  | 9.02878   |
| 59 | 1 | 0 | -20.903901 | -5.025659 | -6.589736 |
| 60 | 1 | 0 | -19.816271 | -1.90622  | -6.525546 |
| 61 | 1 | 0 | -17.640485 | -4.395058 | -6.391986 |
| 62 | 1 | 0 | -25.656352 | 2.307433  | 4.19838   |
| 63 | 1 | 0 | -26.131744 | -0.080862 | 1.930531  |
| 64 | 1 | 0 | -24.096597 | -0.593574 | 4.490847  |

| ENT-1000002_tddft_ |               | Standard Orientation (Ångstroms) |            |           |           |
|--------------------|---------------|----------------------------------|------------|-----------|-----------|
| Center number      | Atomic number | Atomic Type                      | X          | Y         | Z         |
| 0                  | 6             | 0                                | -22.015612 | 1.191386  | -0.728154 |
| 1                  | 6             | 0                                | -23.407946 | -0.698554 | -2.292649 |
| 2                  | 6             | 0                                | -22.361658 | -3.39411  | -1.94203  |
| 3                  | 6             | 0                                | -19.724957 | -3.773447 | -2.923934 |
| 4                  | 6             | 0                                | -17.787119 | -4.066436 | -1.331758 |

|    |   |   |            |           |           |
|----|---|---|------------|-----------|-----------|
| 5  | 6 | 0 | -14.322762 | -2.778991 | 5.029269  |
| 6  | 6 | 0 | -16.053939 | -0.839885 | 5.987236  |
| 7  | 6 | 0 | -17.819574 | 0.279955  | 4.563078  |
| 8  | 6 | 0 | -19.52921  | 2.392563  | 5.343305  |
| 9  | 6 | 0 | -20.846838 | 3.627673  | 3.075614  |
| 10 | 6 | 0 | -22.535492 | 1.849467  | 1.651383  |
| 11 | 6 | 0 | -15.081353 | -4.540711 | -1.961295 |
| 12 | 6 | 0 | -13.275951 | -2.253418 | -1.887533 |
| 13 | 6 | 0 | -12.967195 | -0.985849 | 0.753384  |
| 14 | 6 | 0 | -13.015529 | -2.846102 | 2.865882  |
| 15 | 6 | 0 | -10.563493 | -3.139651 | -2.540754 |
| 16 | 6 | 0 | -8.730474  | -1.636507 | -0.869506 |
| 17 | 6 | 0 | -10.345515 | 0.309584  | 0.531839  |
| 18 | 6 | 0 | -9.216261  | 1.330447  | 2.979784  |
| 19 | 6 | 0 | -10.908822 | 3.342392  | 4.148584  |
| 20 | 6 | 0 | -6.568428  | 2.380624  | 2.555131  |
| 21 | 6 | 0 | -14.175672 | -0.284525 | -3.79148  |
| 22 | 6 | 0 | -15.672657 | -0.212313 | 8.728587  |
| 23 | 6 | 0 | -19.488408 | -3.786717 | -5.742925 |
| 24 | 6 | 0 | -24.722041 | 0.817564  | 3.121055  |
| 25 | 1 | 0 | -14.422108 | 0.429531  | 1.035155  |
| 26 | 1 | 0 | -20.342831 | 2.007196  | -1.591071 |
| 27 | 1 | 0 | -23.312754 | -0.171401 | -4.283488 |
| 28 | 1 | 0 | -25.410411 | -0.723518 | -1.809192 |
| 29 | 1 | 0 | -23.633313 | -4.710317 | -2.906022 |
| 30 | 1 | 0 | -22.429725 | -3.855227 | 0.064014  |
| 31 | 1 | 0 | -18.209485 | -4.010352 | 0.673289  |
| 32 | 1 | 0 | -13.922947 | -4.284686 | 6.370894  |
| 33 | 1 | 0 | -18.075088 | -0.380169 | 2.646061  |
| 34 | 1 | 0 | -18.469774 | 3.843829  | 6.358003  |
| 35 | 1 | 0 | -20.960977 | 1.725576  | 6.677527  |
| 36 | 1 | 0 | -19.414975 | 4.392401  | 1.805087  |
| 37 | 1 | 0 | -21.952616 | 5.23315   | 3.763697  |
| 38 | 1 | 0 | -14.913882 | -5.371011 | -3.841169 |
| 39 | 1 | 0 | -14.361546 | -5.962803 | -0.652698 |
| 40 | 1 | 0 | -11.727685 | -4.429979 | 2.654106  |
| 41 | 1 | 0 | -10.187222 | -2.867873 | -4.547151 |
| 42 | 1 | 0 | -10.374574 | -5.160497 | -2.190419 |
| 43 | 1 | 0 | -7.805265  | -2.882163 | 0.489551  |
| 44 | 1 | 0 | -7.229025  | -0.745352 | -1.955039 |
| 45 | 1 | 0 | -10.609014 | 1.935693  | -0.716366 |
| 46 | 1 | 0 | -9.075303  | -0.244598 | 4.311854  |
| 47 | 1 | 0 | -11.11749  | 4.947313  | 2.867818  |

|    |   |   |            |           |           |
|----|---|---|------------|-----------|-----------|
| 48 | 1 | 0 | -10.106643 | 4.056433  | 5.906784  |
| 49 | 1 | 0 | -12.786991 | 2.623275  | 4.559599  |
| 50 | 1 | 0 | -5.806387  | 3.179025  | 4.294244  |
| 51 | 1 | 0 | -5.254884  | 0.935958  | 1.908751  |
| 52 | 1 | 0 | -6.591063  | 3.883788  | 1.141938  |
| 53 | 1 | 0 | -14.248351 | -1.091397 | -5.684557 |
| 54 | 1 | 0 | -16.06496  | 0.380586  | -3.323203 |
| 55 | 1 | 0 | -12.924378 | 1.345627  | -3.872543 |
| 56 | 1 | 0 | -15.631761 | -1.935356 | 9.861821  |
| 57 | 1 | 0 | -17.147967 | 0.999049  | 9.480681  |
| 58 | 1 | 0 | -13.85865  | 0.723505  | 9.02878   |
| 59 | 1 | 0 | -20.903901 | -5.025659 | -6.589736 |
| 60 | 1 | 0 | -19.816271 | -1.90622  | -6.525546 |
| 61 | 1 | 0 | -17.640485 | -4.395058 | -6.391986 |
| 62 | 1 | 0 | -25.656352 | 2.307433  | 4.19838   |
| 63 | 1 | 0 | -26.131744 | -0.080862 | 1.930531  |
| 64 | 1 | 0 | -24.096597 | -0.593574 | 4.490847  |

| ENT-1000006_en_ |               | Standard Orientation (Ångstroms) |            |           |           |
|-----------------|---------------|----------------------------------|------------|-----------|-----------|
| Center number   | Atomic number | Atomic Type                      | X          | Y         | Z         |
| 0               | 6             | 0                                | -22.541216 | -0.064117 | 0.601795  |
| 1               | 6             | 0                                | -23.380557 | -1.181096 | -1.851308 |
| 2               | 6             | 0                                | -22.776994 | -3.993962 | -2.02323  |
| 3               | 6             | 0                                | -20.044125 | -4.775939 | -2.075778 |
| 4               | 6             | 0                                | -18.131257 | -3.135491 | -2.15499  |
| 5               | 6             | 0                                | -14.08273  | -3.175007 | 4.74333   |
| 6               | 6             | 0                                | -16.030196 | -1.62072  | 5.957011  |
| 7               | 6             | 0                                | -18.043356 | -0.808087 | 4.65969   |
| 8               | 6             | 0                                | -20.122012 | 0.883457  | 5.53568   |
| 9               | 6             | 0                                | -20.668385 | 2.995999  | 3.64028   |
| 10              | 6             | 0                                | -21.567065 | 2.212727  | 1.052002  |
| 11              | 6             | 0                                | -15.380993 | -3.789354 | -2.372822 |
| 12              | 6             | 0                                | -13.509328 | -1.604656 | -2.059488 |
| 13              | 6             | 0                                | -13.157655 | -0.66853  | 0.708298  |
| 14              | 6             | 0                                | -12.906084 | -2.799875 | 2.540099  |
| 15              | 6             | 0                                | -10.81602  | -2.476006 | -2.745977 |
| 16              | 6             | 0                                | -8.99309   | -0.786513 | -1.240008 |
| 17              | 6             | 0                                | -10.643953 | 0.827061  | 0.529081  |
| 18              | 6             | 0                                | -9.420264  | 1.582982  | 3.026492  |
| 19              | 6             | 0                                | -11.188263 | 3.232978  | 4.585203  |
| 20              | 6             | 0                                | -6.920098  | 2.944798  | 2.5917    |
| 21              | 6             | 0                                | -14.251199 | 0.594138  | -3.784605 |

|    |   |   |            |           |           |
|----|---|---|------------|-----------|-----------|
| 22 | 6 | 0 | -15.581577 | -1.143904 | 8.716025  |
| 23 | 6 | 0 | -19.675495 | -7.582895 | -2.102529 |
| 24 | 6 | 0 | -21.230841 | 4.206467  | -0.92582  |
| 25 | 1 | 0 | -14.695744 | 0.569074  | 1.265112  |
| 26 | 1 | 0 | -22.707163 | -1.359168 | 2.180553  |
| 27 | 1 | 0 | -22.563352 | -0.188907 | -3.460076 |
| 28 | 1 | 0 | -25.430427 | -0.976788 | -2.04904  |
| 29 | 1 | 0 | -23.692283 | -4.771149 | -3.709961 |
| 30 | 1 | 0 | -23.701115 | -4.963329 | -0.442247 |
| 31 | 1 | 0 | -18.594345 | -1.148937 | -2.126927 |
| 32 | 1 | 0 | -13.43116  | -4.769222 | 5.867349  |
| 33 | 1 | 0 | -18.20702  | -1.443134 | 2.723007  |
| 34 | 1 | 0 | -19.664651 | 1.745319  | 7.34686   |
| 35 | 1 | 0 | -21.849076 | -0.207117 | 5.858612  |
| 36 | 1 | 0 | -18.943626 | 4.11309   | 3.40585   |
| 37 | 1 | 0 | -22.045711 | 4.30627   | 4.460893  |
| 38 | 1 | 0 | -15.034314 | -4.610907 | -4.242451 |
| 39 | 1 | 0 | -14.88582  | -5.265864 | -1.023075 |
| 40 | 1 | 0 | -11.459697 | -4.173247 | 2.056831  |
| 41 | 1 | 0 | -10.508508 | -2.380598 | -4.780334 |
| 42 | 1 | 0 | -10.569152 | -4.451761 | -2.214162 |
| 43 | 1 | 0 | -7.683123  | -1.939294 | -0.14431  |
| 44 | 1 | 0 | -7.834709  | 0.393776  | -2.462268 |
| 45 | 1 | 0 | -11.094607 | 2.593652  | -0.440714 |
| 46 | 1 | 0 | -9.034939  | -0.142176 | 4.09856   |
| 47 | 1 | 0 | -11.625591 | 4.978727  | 3.574048  |
| 48 | 1 | 0 | -10.324615 | 3.759837  | 6.379985  |
| 49 | 1 | 0 | -12.965291 | 2.288591  | 4.993821  |
| 50 | 1 | 0 | -6.072401  | 3.51838   | 4.379329  |
| 51 | 1 | 0 | -5.552976  | 1.765622  | 1.605981  |
| 52 | 1 | 0 | -7.202113  | 4.65042   | 1.464967  |
| 53 | 1 | 0 | -15.85901  | 1.645778  | -3.051123 |
| 54 | 1 | 0 | -12.711166 | 1.928825  | -4.042769 |
| 55 | 1 | 0 | -14.765787 | -0.109207 | -5.651364 |
| 56 | 1 | 0 | -15.495266 | -2.93318  | 9.741861  |
| 57 | 1 | 0 | -17.049338 | -0.003198 | 9.584977  |
| 58 | 1 | 0 | -13.770903 | -0.208507 | 9.024202  |
| 59 | 1 | 0 | -17.700387 | -8.1337   | -2.141936 |
| 60 | 1 | 0 | -20.540894 | -8.450835 | -0.441142 |
| 61 | 1 | 0 | -20.596917 | -8.4311   | -3.744716 |
| 62 | 1 | 0 | -22.03588  | 3.69555   | -2.742372 |
| 63 | 1 | 0 | -22.115863 | 5.974058  | -0.331059 |
| 64 | 1 | 0 | -19.229833 | 4.634028  | -1.208875 |

| ENT-1000006_tddft_ |               | Standard Orientation (Ångstroms) |            |           |           |
|--------------------|---------------|----------------------------------|------------|-----------|-----------|
| Center number      | Atomic number | Atomic Type                      | X          | Y         | Z         |
| 0                  | 6             | 0                                | -22.541216 | -0.064117 | 0.601795  |
| 1                  | 6             | 0                                | -23.380557 | -1.181096 | -1.851308 |
| 2                  | 6             | 0                                | -22.776994 | -3.993962 | -2.02323  |
| 3                  | 6             | 0                                | -20.044125 | -4.775939 | -2.075778 |
| 4                  | 6             | 0                                | -18.131257 | -3.135491 | -2.15499  |
| 5                  | 6             | 0                                | -14.08273  | -3.175007 | 4.74333   |
| 6                  | 6             | 0                                | -16.030196 | -1.62072  | 5.957011  |
| 7                  | 6             | 0                                | -18.043356 | -0.808087 | 4.65969   |
| 8                  | 6             | 0                                | -20.122012 | 0.883457  | 5.53568   |
| 9                  | 6             | 0                                | -20.668385 | 2.995999  | 3.64028   |
| 10                 | 6             | 0                                | -21.567065 | 2.212727  | 1.052002  |
| 11                 | 6             | 0                                | -15.380993 | -3.789354 | -2.372822 |
| 12                 | 6             | 0                                | -13.509328 | -1.604656 | -2.059488 |
| 13                 | 6             | 0                                | -13.157655 | -0.66853  | 0.708298  |
| 14                 | 6             | 0                                | -12.906084 | -2.799875 | 2.540099  |
| 15                 | 6             | 0                                | -10.81602  | -2.476006 | -2.745977 |
| 16                 | 6             | 0                                | -8.99309   | -0.786513 | -1.240008 |
| 17                 | 6             | 0                                | -10.643953 | 0.827061  | 0.529081  |
| 18                 | 6             | 0                                | -9.420264  | 1.582982  | 3.026492  |
| 19                 | 6             | 0                                | -11.188263 | 3.232978  | 4.585203  |
| 20                 | 6             | 0                                | -6.920098  | 2.944798  | 2.5917    |
| 21                 | 6             | 0                                | -14.251199 | 0.594138  | -3.784605 |
| 22                 | 6             | 0                                | -15.581577 | -1.143904 | 8.716025  |
| 23                 | 6             | 0                                | -19.675495 | -7.582895 | -2.102529 |
| 24                 | 6             | 0                                | -21.230841 | 4.206467  | -0.92582  |
| 25                 | 1             | 0                                | -14.695744 | 0.569074  | 1.265112  |
| 26                 | 1             | 0                                | -22.707163 | -1.359168 | 2.180553  |
| 27                 | 1             | 0                                | -22.563352 | -0.188907 | -3.460076 |
| 28                 | 1             | 0                                | -25.430427 | -0.976788 | -2.04904  |
| 29                 | 1             | 0                                | -23.692283 | -4.771149 | -3.709961 |
| 30                 | 1             | 0                                | -23.701115 | -4.963329 | -0.442247 |
| 31                 | 1             | 0                                | -18.594345 | -1.148937 | -2.126927 |
| 32                 | 1             | 0                                | -13.43116  | -4.769222 | 5.867349  |
| 33                 | 1             | 0                                | -18.20702  | -1.443134 | 2.723007  |
| 34                 | 1             | 0                                | -19.664651 | 1.745319  | 7.34686   |
| 35                 | 1             | 0                                | -21.849076 | -0.207117 | 5.858612  |
| 36                 | 1             | 0                                | -18.943626 | 4.11309   | 3.40585   |
| 37                 | 1             | 0                                | -22.045711 | 4.30627   | 4.460893  |
| 38                 | 1             | 0                                | -15.034314 | -4.610907 | -4.242451 |

|    |   |   |            |           |           |
|----|---|---|------------|-----------|-----------|
| 39 | 1 | 0 | -14.88582  | -5.265864 | -1.023075 |
| 40 | 1 | 0 | -11.459697 | -4.173247 | 2.056831  |
| 41 | 1 | 0 | -10.508508 | -2.380598 | -4.780334 |
| 42 | 1 | 0 | -10.569152 | -4.451761 | -2.214162 |
| 43 | 1 | 0 | -7.683123  | -1.939294 | -0.14431  |
| 44 | 1 | 0 | -7.834709  | 0.393776  | -2.462268 |
| 45 | 1 | 0 | -11.094607 | 2.593652  | -0.440714 |
| 46 | 1 | 0 | -9.034939  | -0.142176 | 4.09856   |
| 47 | 1 | 0 | -11.625591 | 4.978727  | 3.574048  |
| 48 | 1 | 0 | -10.324615 | 3.759837  | 6.379985  |
| 49 | 1 | 0 | -12.965291 | 2.288591  | 4.993821  |
| 50 | 1 | 0 | -6.072401  | 3.51838   | 4.379329  |
| 51 | 1 | 0 | -5.552976  | 1.765622  | 1.605981  |
| 52 | 1 | 0 | -7.202113  | 4.65042   | 1.464967  |
| 53 | 1 | 0 | -15.85901  | 1.645778  | -3.051123 |
| 54 | 1 | 0 | -12.711166 | 1.928825  | -4.042769 |
| 55 | 1 | 0 | -14.765787 | -0.109207 | -5.651364 |
| 56 | 1 | 0 | -15.495266 | -2.93318  | 9.741861  |
| 57 | 1 | 0 | -17.049338 | -0.003198 | 9.584977  |
| 58 | 1 | 0 | -13.770903 | -0.208507 | 9.024202  |
| 59 | 1 | 0 | -17.700387 | -8.1337   | -2.141936 |
| 60 | 1 | 0 | -20.540894 | -8.450835 | -0.441142 |
| 61 | 1 | 0 | -20.596917 | -8.4311   | -3.744716 |
| 62 | 1 | 0 | -22.03588  | 3.69555   | -2.742372 |
| 63 | 1 | 0 | -22.115863 | 5.974058  | -0.331059 |
| 64 | 1 | 0 | -19.229833 | 4.634028  | -1.208875 |

| ENT-1000007_en_ |               | Standard Orientation (Ångstroms) |            |           |           |
|-----------------|---------------|----------------------------------|------------|-----------|-----------|
| Center number   | Atomic number | Atomic Type                      | X          | Y         | Z         |
| 0               | 6             | 0                                | -21.205721 | 0.931473  | -0.624653 |
| 1               | 6             | 0                                | -22.61003  | -0.939205 | -2.208114 |
| 2               | 6             | 0                                | -22.017874 | -3.709186 | -1.529199 |
| 3               | 6             | 0                                | -19.422082 | -4.545626 | -2.336083 |
| 4               | 6             | 0                                | -17.4698   | -4.319283 | -0.756957 |
| 5               | 6             | 0                                | -14.651774 | -2.491124 | 5.144901  |
| 6               | 6             | 0                                | -17.047664 | -1.132997 | 5.47546   |
| 7               | 6             | 0                                | -17.193213 | 1.370937  | 5.160051  |
| 8               | 6             | 0                                | -19.415493 | 3.073893  | 5.418609  |
| 9               | 6             | 0                                | -20.445202 | 3.974752  | 2.841536  |
| 10              | 6             | 0                                | -22.040407 | 2.074185  | 1.464262  |
| 11              | 6             | 0                                | -14.765401 | -4.965362 | -1.190648 |
| 12              | 6             | 0                                | -13.013758 | -2.663882 | -1.477437 |

|    |   |   |            |           |           |
|----|---|---|------------|-----------|-----------|
| 13 | 6 | 0 | -12.995584 | -0.881638 | 0.874451  |
| 14 | 6 | 0 | -12.955994 | -2.364826 | 3.276357  |
| 15 | 6 | 0 | -10.221529 | -3.486881 | -1.702019 |
| 16 | 6 | 0 | -8.633936  | -1.487691 | -0.313837 |
| 17 | 6 | 0 | -10.490681 | 0.589422  | 0.490036  |
| 18 | 6 | 0 | -9.660696  | 2.307236  | 2.662822  |
| 19 | 6 | 0 | -11.201044 | 4.741159  | 2.667642  |
| 20 | 6 | 0 | -6.858471  | 2.962973  | 2.547776  |
| 21 | 6 | 0 | -13.801751 | -1.185883 | -3.82764  |
| 22 | 6 | 0 | -19.205322 | -2.761542 | 6.329344  |
| 23 | 6 | 0 | -19.259796 | -5.536307 | -4.978888 |
| 24 | 6 | 0 | -24.602317 | 1.638697  | 2.585757  |
| 25 | 1 | 0 | -14.633939 | 0.356133  | 0.832819  |
| 26 | 1 | 0 | -19.301634 | 1.371908  | -1.242217 |
| 27 | 1 | 0 | -22.155445 | -0.623482 | -4.196654 |
| 28 | 1 | 0 | -24.640991 | -0.645358 | -2.042651 |
| 29 | 1 | 0 | -23.434237 | -4.917653 | -2.423673 |
| 30 | 1 | 0 | -22.241092 | -3.935763 | 0.505216  |
| 31 | 1 | 0 | -17.865161 | -3.513367 | 1.082033  |
| 32 | 1 | 0 | -14.272362 | -3.879861 | 6.614274  |
| 33 | 1 | 0 | -15.45687  | 2.327416  | 4.662869  |
| 34 | 1 | 0 | -18.830213 | 4.747077  | 6.478168  |
| 35 | 1 | 0 | -20.925799 | 2.210686  | 6.516341  |
| 36 | 1 | 0 | -18.857947 | 4.550255  | 1.658973  |
| 37 | 1 | 0 | -21.57844  | 5.673884  | 3.166097  |
| 38 | 1 | 0 | -14.530948 | -6.154141 | -2.856583 |
| 39 | 1 | 0 | -14.098067 | -6.084615 | 0.410442  |
| 40 | 1 | 0 | -11.336369 | -3.607099 | 3.48005   |
| 41 | 1 | 0 | -9.679883  | -3.675202 | -3.679718 |
| 42 | 1 | 0 | -9.953834  | -5.344233 | -0.852783 |
| 43 | 1 | 0 | -7.727647  | -2.315883 | 1.340158  |
| 44 | 1 | 0 | -7.118399  | -0.731219 | -1.47949  |
| 45 | 1 | 0 | -10.768798 | 1.820857  | -1.1429   |
| 46 | 1 | 0 | -10.007358 | 1.305087  | 4.43759   |
| 47 | 1 | 0 | -10.678603 | 5.92076   | 1.057658  |
| 48 | 1 | 0 | -10.871023 | 5.841325  | 4.377216  |
| 49 | 1 | 0 | -13.220111 | 4.391131  | 2.526063  |
| 50 | 1 | 0 | -6.359109  | 4.281349  | 4.049494  |
| 51 | 1 | 0 | -5.659491  | 1.305817  | 2.754392  |
| 52 | 1 | 0 | -6.381814  | 3.863189  | 0.753979  |
| 53 | 1 | 0 | -15.711427 | -0.446996 | -3.63817  |
| 54 | 1 | 0 | -12.537573 | 0.385452  | -4.218335 |
| 55 | 1 | 0 | -13.775205 | -2.416808 | -5.47955  |

|    |   |   |            |           |           |
|----|---|---|------------|-----------|-----------|
| 56 | 1 | 0 | -20.922481 | -1.695343 | 6.67206   |
| 57 | 1 | 0 | -18.713958 | -3.757581 | 8.068701  |
| 58 | 1 | 0 | -19.632711 | -4.211414 | 4.928848  |
| 59 | 1 | 0 | -19.989696 | -4.154455 | -6.327501 |
| 60 | 1 | 0 | -17.348104 | -6.007785 | -5.553009 |
| 61 | 1 | 0 | -20.425141 | -7.226654 | -5.195932 |
| 62 | 1 | 0 | -25.708295 | 3.382377  | 2.579722  |
| 63 | 1 | 0 | -25.684519 | 0.198756  | 1.606064  |
| 64 | 1 | 0 | -24.462621 | 1.056362  | 4.558285  |

| ENT-1000007_tddft_ |               | Standard Orientation (Ångstroms) |            |           |           |
|--------------------|---------------|----------------------------------|------------|-----------|-----------|
| Center number      | Atomic number | Atomic Type                      | X          | Y         | Z         |
| 0                  | 6             | 0                                | -21.205721 | 0.931473  | -0.624653 |
| 1                  | 6             | 0                                | -22.61003  | -0.939205 | -2.208114 |
| 2                  | 6             | 0                                | -22.017874 | -3.709186 | -1.529199 |
| 3                  | 6             | 0                                | -19.422082 | -4.545626 | -2.336083 |
| 4                  | 6             | 0                                | -17.4698   | -4.319283 | -0.756957 |
| 5                  | 6             | 0                                | -14.651774 | -2.491124 | 5.144901  |
| 6                  | 6             | 0                                | -17.047664 | -1.132997 | 5.47546   |
| 7                  | 6             | 0                                | -17.193213 | 1.370937  | 5.160051  |
| 8                  | 6             | 0                                | -19.415493 | 3.073893  | 5.418609  |
| 9                  | 6             | 0                                | -20.445202 | 3.974752  | 2.841536  |
| 10                 | 6             | 0                                | -22.040407 | 2.074185  | 1.464262  |
| 11                 | 6             | 0                                | -14.765401 | -4.965362 | -1.190648 |
| 12                 | 6             | 0                                | -13.013758 | -2.663882 | -1.477437 |
| 13                 | 6             | 0                                | -12.995584 | -0.881638 | 0.874451  |
| 14                 | 6             | 0                                | -12.955994 | -2.364826 | 3.276357  |
| 15                 | 6             | 0                                | -10.221529 | -3.486881 | -1.702019 |
| 16                 | 6             | 0                                | -8.633936  | -1.487691 | -0.313837 |
| 17                 | 6             | 0                                | -10.490681 | 0.589422  | 0.490036  |
| 18                 | 6             | 0                                | -9.660696  | 2.307236  | 2.662822  |
| 19                 | 6             | 0                                | -11.201044 | 4.741159  | 2.667642  |
| 20                 | 6             | 0                                | -6.858471  | 2.962973  | 2.547776  |
| 21                 | 6             | 0                                | -13.801751 | -1.185883 | -3.82764  |
| 22                 | 6             | 0                                | -19.205322 | -2.761542 | 6.329344  |
| 23                 | 6             | 0                                | -19.259796 | -5.536307 | -4.978888 |
| 24                 | 6             | 0                                | -24.602317 | 1.638697  | 2.585757  |
| 25                 | 1             | 0                                | -14.633939 | 0.356133  | 0.832819  |
| 26                 | 1             | 0                                | -19.301634 | 1.371908  | -1.242217 |
| 27                 | 1             | 0                                | -22.155445 | -0.623482 | -4.196654 |
| 28                 | 1             | 0                                | -24.640991 | -0.645358 | -2.042651 |
| 29                 | 1             | 0                                | -23.434237 | -4.917653 | -2.423673 |



|    |   |   |            |           |           |
|----|---|---|------------|-----------|-----------|
| 30 | 1 | 0 | -22.241092 | -3.935763 | 0.505216  |
| 31 | 1 | 0 | -17.865161 | -3.513367 | 1.082033  |
| 32 | 1 | 0 | -14.272362 | -3.879861 | 6.614274  |
| 33 | 1 | 0 | -15.45687  | 2.327416  | 4.662869  |
| 34 | 1 | 0 | -18.830213 | 4.747077  | 6.478168  |
| 35 | 1 | 0 | -20.925799 | 2.210686  | 6.516341  |
| 36 | 1 | 0 | -18.857947 | 4.550255  | 1.658973  |
| 37 | 1 | 0 | -21.57844  | 5.673884  | 3.166097  |
| 38 | 1 | 0 | -14.530948 | -6.154141 | -2.856583 |
| 39 | 1 | 0 | -14.098067 | -6.084615 | 0.410442  |
| 40 | 1 | 0 | -11.336369 | -3.607099 | 3.48005   |
| 41 | 1 | 0 | -9.679883  | -3.675202 | -3.679718 |
| 42 | 1 | 0 | -9.953834  | -5.344233 | -0.852783 |
| 43 | 1 | 0 | -7.727647  | -2.315883 | 1.340158  |
| 44 | 1 | 0 | -7.118399  | -0.731219 | -1.47949  |
| 45 | 1 | 0 | -10.768798 | 1.820857  | -1.1429   |
| 46 | 1 | 0 | -10.007358 | 1.305087  | 4.43759   |
| 47 | 1 | 0 | -10.678603 | 5.92076   | 1.057658  |
| 48 | 1 | 0 | -10.871023 | 5.841325  | 4.377216  |
| 49 | 1 | 0 | -13.220111 | 4.391131  | 2.526063  |
| 50 | 1 | 0 | -6.359109  | 4.281349  | 4.049494  |
| 51 | 1 | 0 | -5.659491  | 1.305817  | 2.754392  |
| 52 | 1 | 0 | -6.381814  | 3.863189  | 0.753979  |
| 53 | 1 | 0 | -15.711427 | -0.446996 | -3.63817  |
| 54 | 1 | 0 | -12.537573 | 0.385452  | -4.218335 |
| 55 | 1 | 0 | -13.775205 | -2.416808 | -5.47955  |
| 56 | 1 | 0 | -20.922481 | -1.695343 | 6.67206   |
| 57 | 1 | 0 | -18.713958 | -3.757581 | 8.068701  |
| 58 | 1 | 0 | -19.632711 | -4.211414 | 4.928848  |
| 59 | 1 | 0 | -19.989696 | -4.154455 | -6.327501 |
| 60 | 1 | 0 | -17.348104 | -6.007785 | -5.553009 |
| 61 | 1 | 0 | -20.425141 | -7.226654 | -5.195932 |
| 62 | 1 | 0 | -25.708295 | 3.382377  | 2.579722  |
| 63 | 1 | 0 | -25.684519 | 0.198756  | 1.606064  |
| 64 | 1 | 0 | -24.462621 | 1.056362  | 4.558285  |

| ENT-1000008_en_ |               | Standard Orientation (Ångstroms) |            |           |           |
|-----------------|---------------|----------------------------------|------------|-----------|-----------|
| Center number   | Atomic number | Atomic Type                      | X          | Y         | Z         |
| 0               | 6             | 0                                | -22.012561 | 0.6369    | -1.137144 |
| 1               | 6             | 0                                | -23.239174 | -1.40499  | -2.647708 |
| 2               | 6             | 0                                | -22.099252 | -4.025128 | -2.082072 |
| 3               | 6             | 0                                | -19.402165 | -4.341083 | -2.908348 |

|    |   |   |            |           |           |
|----|---|---|------------|-----------|-----------|
| 4  | 6 | 0 | -17.538936 | -4.432797 | -1.207114 |
| 5  | 6 | 0 | -14.472881 | -2.562114 | 5.238872  |
| 6  | 6 | 0 | -16.322482 | -0.639565 | 5.986412  |
| 7  | 6 | 0 | -18.083727 | 0.275449  | 4.417762  |
| 8  | 6 | 0 | -19.926944 | 2.349525  | 4.958998  |
| 9  | 6 | 0 | -21.159747 | 3.373834  | 2.544067  |
| 10 | 6 | 0 | -22.696322 | 1.436027  | 1.156209  |
| 11 | 6 | 0 | -14.785323 | -4.818562 | -1.66702  |
| 12 | 6 | 0 | -13.092897 | -2.446819 | -1.649541 |
| 13 | 6 | 0 | -13.007841 | -0.992446 | 0.911351  |
| 14 | 6 | 0 | -13.073414 | -2.71329  | 3.138976  |
| 15 | 6 | 0 | -10.307677 | -3.235298 | -2.075396 |
| 16 | 6 | 0 | -8.655517  | -1.520066 | -0.418745 |
| 17 | 6 | 0 | -10.447633 | 0.429391  | 0.745779  |
| 18 | 6 | 0 | -9.517764  | 1.682545  | 3.16934   |
| 19 | 6 | 0 | -11.36123  | 3.696122  | 4.079254  |
| 20 | 6 | 0 | -6.895987  | 2.821283  | 2.817805  |
| 21 | 6 | 0 | -13.966352 | -0.654524 | -3.732351 |
| 22 | 6 | 0 | -16.070846 | 0.213303  | 8.681133  |
| 23 | 6 | 0 | -19.01789  | -4.537555 | -5.704067 |
| 24 | 6 | 0 | -24.925586 | 0.419748  | 2.573551  |
| 25 | 1 | 0 | -14.552248 | 0.349282  | 1.009767  |
| 26 | 1 | 0 | -20.318017 | 1.453584  | -1.955769 |
| 27 | 1 | 0 | -23.059416 | -0.993038 | -4.659965 |
| 28 | 1 | 0 | -25.261302 | -1.491726 | -2.26578  |
| 29 | 1 | 0 | -23.263379 | -5.452312 | -3.023567 |
| 30 | 1 | 0 | -22.24966  | -4.368088 | -0.056958 |
| 31 | 1 | 0 | -18.070232 | -4.265516 | 0.765766  |
| 32 | 1 | 0 | -14.068115 | -3.955037 | 6.696135  |
| 33 | 1 | 0 | -18.228976 | -0.547722 | 2.552363  |
| 34 | 1 | 0 | -18.996109 | 3.911546  | 5.933759  |
| 35 | 1 | 0 | -21.40399  | 1.698874  | 6.251308  |
| 36 | 1 | 0 | -19.687266 | 4.112326  | 1.305494  |
| 37 | 1 | 0 | -22.365453 | 4.972025  | 3.059294  |
| 38 | 1 | 0 | -14.481816 | -5.758899 | -3.477076 |
| 39 | 1 | 0 | -14.076498 | -6.119845 | -0.232475 |
| 40 | 1 | 0 | -11.709333 | -4.246025 | 3.086196  |
| 41 | 1 | 0 | -9.819391  | -3.094544 | -4.071298 |
| 42 | 1 | 0 | -10.046635 | -5.212201 | -1.558456 |
| 43 | 1 | 0 | -7.751946  | -2.615432 | 1.077043  |
| 44 | 1 | 0 | -7.139683  | -0.627267 | -1.482828 |
| 45 | 1 | 0 | -10.71655  | 1.948451  | -0.629172 |
| 46 | 1 | 0 | -9.393749  | 0.222789  | 4.627593  |

|    |   |   |            |           |           |
|----|---|---|------------|-----------|-----------|
| 47 | 1 | 0 | -11.554069 | 5.19653   | 2.674578  |
| 48 | 1 | 0 | -10.698315 | 4.569985  | 5.823199  |
| 49 | 1 | 0 | -13.232019 | 2.927541  | 4.432476  |
| 50 | 1 | 0 | -6.271431  | 3.77486   | 4.533433  |
| 51 | 1 | 0 | -5.487837  | 1.396206  | 2.352709  |
| 52 | 1 | 0 | -6.899435  | 4.217568  | 1.298913  |
| 53 | 1 | 0 | -15.907899 | -0.053319 | -3.414037 |
| 54 | 1 | 0 | -12.787986 | 1.026316  | -3.852263 |
| 55 | 1 | 0 | -13.892339 | -1.583786 | -5.56838  |
| 56 | 1 | 0 | -16.103915 | -1.40828  | 9.956247  |
| 57 | 1 | 0 | -17.571563 | 1.490229  | 9.252865  |
| 58 | 1 | 0 | -14.266075 | 1.162826  | 8.991172  |
| 59 | 1 | 0 | -17.107007 | -5.082245 | -6.212461 |
| 60 | 1 | 0 | -20.315346 | -5.915427 | -6.525396 |
| 61 | 1 | 0 | -19.404514 | -2.740968 | -6.641946 |
| 62 | 1 | 0 | -25.957009 | 1.936503  | 3.515834  |
| 63 | 1 | 0 | -26.246897 | -0.590268 | 1.37113   |
| 64 | 1 | 0 | -24.327826 | -0.891054 | 4.051319  |

| ENT-1000008_tddft_ |               | Standard Orientation (Ångstroms) |            |           |           |
|--------------------|---------------|----------------------------------|------------|-----------|-----------|
| Center number      | Atomic number | Atomic Type                      | X          | Y         | Z         |
| 0                  | 6             | 0                                | -22.012561 | 0.6369    | -1.137144 |
| 1                  | 6             | 0                                | -23.239174 | -1.40499  | -2.647708 |
| 2                  | 6             | 0                                | -22.099252 | -4.025128 | -2.082072 |
| 3                  | 6             | 0                                | -19.402165 | -4.341083 | -2.908348 |
| 4                  | 6             | 0                                | -17.538936 | -4.432797 | -1.207114 |
| 5                  | 6             | 0                                | -14.472881 | -2.562114 | 5.238872  |
| 6                  | 6             | 0                                | -16.322482 | -0.639565 | 5.986412  |
| 7                  | 6             | 0                                | -18.083727 | 0.275449  | 4.417762  |
| 8                  | 6             | 0                                | -19.926944 | 2.349525  | 4.958998  |
| 9                  | 6             | 0                                | -21.159747 | 3.373834  | 2.544067  |
| 10                 | 6             | 0                                | -22.696322 | 1.436027  | 1.156209  |
| 11                 | 6             | 0                                | -14.785323 | -4.818562 | -1.66702  |
| 12                 | 6             | 0                                | -13.092897 | -2.446819 | -1.649541 |
| 13                 | 6             | 0                                | -13.007841 | -0.992446 | 0.911351  |
| 14                 | 6             | 0                                | -13.073414 | -2.71329  | 3.138976  |
| 15                 | 6             | 0                                | -10.307677 | -3.235298 | -2.075396 |
| 16                 | 6             | 0                                | -8.655517  | -1.520066 | -0.418745 |
| 17                 | 6             | 0                                | -10.447633 | 0.429391  | 0.745779  |
| 18                 | 6             | 0                                | -9.517764  | 1.682545  | 3.16934   |
| 19                 | 6             | 0                                | -11.36123  | 3.696122  | 4.079254  |
| 20                 | 6             | 0                                | -6.895987  | 2.821283  | 2.817805  |

|    |   |   |            |           |           |
|----|---|---|------------|-----------|-----------|
| 21 | 6 | 0 | -13.966352 | -0.654524 | -3.732351 |
| 22 | 6 | 0 | -16.070846 | 0.213303  | 8.681133  |
| 23 | 6 | 0 | -19.01789  | -4.537555 | -5.704067 |
| 24 | 6 | 0 | -24.925586 | 0.419748  | 2.573551  |
| 25 | 1 | 0 | -14.552248 | 0.349282  | 1.009767  |
| 26 | 1 | 0 | -20.318017 | 1.453584  | -1.955769 |
| 27 | 1 | 0 | -23.059416 | -0.993038 | -4.659965 |
| 28 | 1 | 0 | -25.261302 | -1.491726 | -2.26578  |
| 29 | 1 | 0 | -23.263379 | -5.452312 | -3.023567 |
| 30 | 1 | 0 | -22.24966  | -4.368088 | -0.056958 |
| 31 | 1 | 0 | -18.070232 | -4.265516 | 0.765766  |
| 32 | 1 | 0 | -14.068115 | -3.955037 | 6.696135  |
| 33 | 1 | 0 | -18.228976 | -0.547722 | 2.552363  |
| 34 | 1 | 0 | -18.996109 | 3.911546  | 5.933759  |
| 35 | 1 | 0 | -21.40399  | 1.698874  | 6.251308  |
| 36 | 1 | 0 | -19.687266 | 4.112326  | 1.305494  |
| 37 | 1 | 0 | -22.365453 | 4.972025  | 3.059294  |
| 38 | 1 | 0 | -14.481816 | -5.758899 | -3.477076 |
| 39 | 1 | 0 | -14.076498 | -6.119845 | -0.232475 |
| 40 | 1 | 0 | -11.709333 | -4.246025 | 3.086196  |
| 41 | 1 | 0 | -9.819391  | -3.094544 | -4.071298 |
| 42 | 1 | 0 | -10.046635 | -5.212201 | -1.558456 |
| 43 | 1 | 0 | -7.751946  | -2.615432 | 1.077043  |
| 44 | 1 | 0 | -7.139683  | -0.627267 | -1.482828 |
| 45 | 1 | 0 | -10.71655  | 1.948451  | -0.629172 |
| 46 | 1 | 0 | -9.393749  | 0.222789  | 4.627593  |
| 47 | 1 | 0 | -11.554069 | 5.19653   | 2.674578  |
| 48 | 1 | 0 | -10.698315 | 4.569985  | 5.823199  |
| 49 | 1 | 0 | -13.232019 | 2.927541  | 4.432476  |
| 50 | 1 | 0 | -6.271431  | 3.77486   | 4.533433  |
| 51 | 1 | 0 | -5.487837  | 1.396206  | 2.352709  |
| 52 | 1 | 0 | -6.899435  | 4.217568  | 1.298913  |
| 53 | 1 | 0 | -15.907899 | -0.053319 | -3.414037 |
| 54 | 1 | 0 | -12.787986 | 1.026316  | -3.852263 |
| 55 | 1 | 0 | -13.892339 | -1.583786 | -5.56838  |
| 56 | 1 | 0 | -16.103915 | -1.40828  | 9.956247  |
| 57 | 1 | 0 | -17.571563 | 1.490229  | 9.252865  |
| 58 | 1 | 0 | -14.266075 | 1.162826  | 8.991172  |
| 59 | 1 | 0 | -17.107007 | -5.082245 | -6.212461 |
| 60 | 1 | 0 | -20.315346 | -5.915427 | -6.525396 |
| 61 | 1 | 0 | -19.404514 | -2.740968 | -6.641946 |
| 62 | 1 | 0 | -25.957009 | 1.936503  | 3.515834  |
| 63 | 1 | 0 | -26.246897 | -0.590268 | 1.37113   |

|    |   |   |            |           |          |
|----|---|---|------------|-----------|----------|
| 64 | 1 | 0 | -24.327826 | -0.891054 | 4.051319 |
|----|---|---|------------|-----------|----------|

| ENT-1000013_en_ |               | Standard Orientation (Ångstroms) |            |           |           |
|-----------------|---------------|----------------------------------|------------|-----------|-----------|
| Center number   | Atomic number | Atomic Type                      | X          | Y         | Z         |
| 0               | 6             | 0                                | -22.79806  | -0.754459 | 0.839208  |
| 1               | 6             | 0                                | -23.759595 | -2.662982 | -0.988578 |
| 2               | 6             | 0                                | -22.082177 | -5.041782 | -0.984352 |
| 3               | 6             | 0                                | -19.530786 | -4.710632 | -2.189668 |
| 4               | 6             | 0                                | -17.427946 | -4.660376 | -0.791177 |
| 5               | 6             | 0                                | -14.2262   | -2.525549 | 5.211212  |
| 6               | 6             | 0                                | -16.24383  | -0.80806  | 6.026254  |
| 7               | 6             | 0                                | -18.066426 | -0.032057 | 4.452441  |
| 8               | 6             | 0                                | -20.125562 | 1.839389  | 4.94783   |
| 9               | 6             | 0                                | -20.914611 | 3.201126  | 2.530569  |
| 10              | 6             | 0                                | -21.986275 | 1.594272  | 0.43386   |
| 11              | 6             | 0                                | -14.753293 | -4.568232 | -1.687806 |
| 12              | 6             | 0                                | -13.376173 | -1.997147 | -1.714178 |
| 13              | 6             | 0                                | -13.064962 | -0.693738 | 0.916304  |
| 14              | 6             | 0                                | -12.881101 | -2.497849 | 3.069173  |
| 15              | 6             | 0                                | -10.618218 | -2.405143 | -2.643062 |
| 16              | 6             | 0                                | -8.867769  | -0.969969 | -0.840398 |
| 17              | 6             | 0                                | -10.588577 | 0.839877  | 0.598486  |
| 18              | 6             | 0                                | -9.49057   | 1.986704  | 3.004697  |
| 19              | 6             | 0                                | -11.341407 | 3.829237  | 4.212582  |
| 20              | 6             | 0                                | -6.971595  | 3.285612  | 2.498449  |
| 21              | 6             | 0                                | -14.776648 | -0.19194  | -3.469634 |
| 22              | 6             | 0                                | -16.091408 | -0.041459 | 8.752946  |
| 23              | 6             | 0                                | -19.573945 | -4.495144 | -5.009397 |
| 24              | 6             | 0                                | -22.032449 | 2.885963  | -2.081309 |
| 25              | 1             | 0                                | -14.634847 | 0.579958  | 1.24172   |
| 26              | 1             | 0                                | -22.666417 | -1.486447 | 2.748763  |
| 27              | 1             | 0                                | -23.922575 | -1.913219 | -2.895975 |
| 28              | 1             | 0                                | -25.666718 | -3.238742 | -0.433364 |
| 29              | 1             | 0                                | -23.091947 | -6.548632 | -1.976818 |
| 30              | 1             | 0                                | -21.854237 | -5.678425 | 0.962877  |
| 31              | 1             | 0                                | -17.649261 | -4.809604 | 1.241004  |
| 32              | 1             | 0                                | -13.664044 | -3.908645 | 6.624311  |
| 33              | 1             | 0                                | -18.093315 | -0.833912 | 2.575805  |
| 34              | 1             | 0                                | -19.521649 | 3.250846  | 6.320715  |
| 35              | 1             | 0                                | -21.774817 | 0.921207  | 5.795507  |
| 36              | 1             | 0                                | -19.263073 | 4.198964  | 1.783489  |
| 37              | 1             | 0                                | -22.274781 | 4.690759  | 2.993049  |

|    |   |   |            |           |           |
|----|---|---|------------|-----------|-----------|
| 38 | 1 | 0 | -14.628252 | -5.318588 | -3.604948 |
| 39 | 1 | 0 | -13.654541 | -5.860056 | -0.513451 |
| 40 | 1 | 0 | -11.393975 | -3.904103 | 2.923577  |
| 41 | 1 | 0 | -10.419524 | -1.719124 | -4.575195 |
| 42 | 1 | 0 | -10.150618 | -4.410065 | -2.693218 |
| 43 | 1 | 0 | -7.96397   | -2.266094 | 0.487228  |
| 44 | 1 | 0 | -7.351721  | 0.003719  | -1.831224 |
| 45 | 1 | 0 | -11.034934 | 2.420592  | -0.661141 |
| 46 | 1 | 0 | -9.157533  | 0.44639   | 4.343344  |
| 47 | 1 | 0 | -13.118363 | 2.923455  | 4.701365  |
| 48 | 1 | 0 | -11.761503 | 5.38338   | 2.921642  |
| 49 | 1 | 0 | -10.55755  | 4.649829  | 5.931999  |
| 50 | 1 | 0 | -6.242672  | 4.168422  | 4.210967  |
| 51 | 1 | 0 | -5.542759  | 1.968924  | 1.824779  |
| 52 | 1 | 0 | -7.178757  | 4.76873   | 1.078857  |
| 53 | 1 | 0 | -13.860871 | 1.648723  | -3.548715 |
| 54 | 1 | 0 | -14.833073 | -0.931093 | -5.391769 |
| 55 | 1 | 0 | -16.715458 | 0.078999  | -2.840338 |
| 56 | 1 | 0 | -17.717866 | 1.047159  | 9.367949  |
| 57 | 1 | 0 | -14.393555 | 1.070867  | 9.120555  |
| 58 | 1 | 0 | -15.963803 | -1.710572 | 9.959019  |
| 59 | 1 | 0 | -20.455774 | -2.726664 | -5.603085 |
| 60 | 1 | 0 | -17.704497 | -4.5458   | -5.849358 |
| 61 | 1 | 0 | -20.695088 | -6.013361 | -5.843656 |
| 62 | 1 | 0 | -22.91217  | 1.759502  | -3.553004 |
| 63 | 1 | 0 | -23.058141 | 4.673788  | -1.964509 |
| 64 | 1 | 0 | -20.120197 | 3.355451  | -2.700286 |

| ENT-1000013_tddft_ |               | Standard Orientation (Ångstroms) |            |           |           |
|--------------------|---------------|----------------------------------|------------|-----------|-----------|
| Center number      | Atomic number | Atomic Type                      | X          | Y         | Z         |
| 0                  | 6             | 0                                | -22.79806  | -0.754459 | 0.839208  |
| 1                  | 6             | 0                                | -23.759595 | -2.662982 | -0.988578 |
| 2                  | 6             | 0                                | -22.082177 | -5.041782 | -0.984352 |
| 3                  | 6             | 0                                | -19.530786 | -4.710632 | -2.189668 |
| 4                  | 6             | 0                                | -17.427946 | -4.660376 | -0.791177 |
| 5                  | 6             | 0                                | -14.2262   | -2.525549 | 5.211212  |
| 6                  | 6             | 0                                | -16.24383  | -0.80806  | 6.026254  |
| 7                  | 6             | 0                                | -18.066426 | -0.032057 | 4.452441  |
| 8                  | 6             | 0                                | -20.125562 | 1.839389  | 4.94783   |
| 9                  | 6             | 0                                | -20.914611 | 3.201126  | 2.530569  |
| 10                 | 6             | 0                                | -21.986275 | 1.594272  | 0.43386   |
| 11                 | 6             | 0                                | -14.753293 | -4.568232 | -1.687806 |

|    |   |   |            |           |           |
|----|---|---|------------|-----------|-----------|
| 12 | 6 | 0 | -13.376173 | -1.997147 | -1.714178 |
| 13 | 6 | 0 | -13.064962 | -0.693738 | 0.916304  |
| 14 | 6 | 0 | -12.881101 | -2.497849 | 3.069173  |
| 15 | 6 | 0 | -10.618218 | -2.405143 | -2.643062 |
| 16 | 6 | 0 | -8.867769  | -0.969969 | -0.840398 |
| 17 | 6 | 0 | -10.588577 | 0.839877  | 0.598486  |
| 18 | 6 | 0 | -9.49057   | 1.986704  | 3.004697  |
| 19 | 6 | 0 | -11.341407 | 3.829237  | 4.212582  |
| 20 | 6 | 0 | -6.971595  | 3.285612  | 2.498449  |
| 21 | 6 | 0 | -14.776648 | -0.19194  | -3.469634 |
| 22 | 6 | 0 | -16.091408 | -0.041459 | 8.752946  |
| 23 | 6 | 0 | -19.573945 | -4.495144 | -5.009397 |
| 24 | 6 | 0 | -22.032449 | 2.885963  | -2.081309 |
| 25 | 1 | 0 | -14.634847 | 0.579958  | 1.24172   |
| 26 | 1 | 0 | -22.666417 | -1.486447 | 2.748763  |
| 27 | 1 | 0 | -23.922575 | -1.913219 | -2.895975 |
| 28 | 1 | 0 | -25.666718 | -3.238742 | -0.433364 |
| 29 | 1 | 0 | -23.091947 | -6.548632 | -1.976818 |
| 30 | 1 | 0 | -21.854237 | -5.678425 | 0.962877  |
| 31 | 1 | 0 | -17.649261 | -4.809604 | 1.241004  |
| 32 | 1 | 0 | -13.664044 | -3.908645 | 6.624311  |
| 33 | 1 | 0 | -18.093315 | -0.833912 | 2.575805  |
| 34 | 1 | 0 | -19.521649 | 3.250846  | 6.320715  |
| 35 | 1 | 0 | -21.774817 | 0.921207  | 5.795507  |
| 36 | 1 | 0 | -19.263073 | 4.198964  | 1.783489  |
| 37 | 1 | 0 | -22.274781 | 4.690759  | 2.993049  |
| 38 | 1 | 0 | -14.628252 | -5.318588 | -3.604948 |
| 39 | 1 | 0 | -13.654541 | -5.860056 | -0.513451 |
| 40 | 1 | 0 | -11.393975 | -3.904103 | 2.923577  |
| 41 | 1 | 0 | -10.419524 | -1.719124 | -4.575195 |
| 42 | 1 | 0 | -10.150618 | -4.410065 | -2.693218 |
| 43 | 1 | 0 | -7.96397   | -2.266094 | 0.487228  |
| 44 | 1 | 0 | -7.351721  | 0.003719  | -1.831224 |
| 45 | 1 | 0 | -11.034934 | 2.420592  | -0.661141 |
| 46 | 1 | 0 | -9.157533  | 0.44639   | 4.343344  |
| 47 | 1 | 0 | -13.118363 | 2.923455  | 4.701365  |
| 48 | 1 | 0 | -11.761503 | 5.38338   | 2.921642  |
| 49 | 1 | 0 | -10.55755  | 4.649829  | 5.931999  |
| 50 | 1 | 0 | -6.242672  | 4.168422  | 4.210967  |
| 51 | 1 | 0 | -5.542759  | 1.968924  | 1.824779  |
| 52 | 1 | 0 | -7.178757  | 4.76873   | 1.078857  |
| 53 | 1 | 0 | -13.860871 | 1.648723  | -3.548715 |
| 54 | 1 | 0 | -14.833073 | -0.931093 | -5.391769 |

|    |   |   |            |           |           |
|----|---|---|------------|-----------|-----------|
| 55 | 1 | 0 | -16.715458 | 0.078999  | -2.840338 |
| 56 | 1 | 0 | -17.717866 | 1.047159  | 9.367949  |
| 57 | 1 | 0 | -14.393555 | 1.070867  | 9.120555  |
| 58 | 1 | 0 | -15.963803 | -1.710572 | 9.959019  |
| 59 | 1 | 0 | -20.455774 | -2.726664 | -5.603085 |
| 60 | 1 | 0 | -17.704497 | -4.5458   | -5.849358 |
| 61 | 1 | 0 | -20.695088 | -6.013361 | -5.843656 |
| 62 | 1 | 0 | -22.91217  | 1.759502  | -3.553004 |
| 63 | 1 | 0 | -23.058141 | 4.673788  | -1.964509 |
| 64 | 1 | 0 | -20.120197 | 3.355451  | -2.700286 |

**Table S13. Energy profiles (a.u.) of the reaction forming the carbocation precursor to IM3 at the M06–2X/6–31 G(d,p) level.**

| Key states | Gibbs free energy (a.u.) | Relative free energy (kcal/mol) |
|------------|--------------------------|---------------------------------|
| IM1        | -976.047012              | 0                               |
| TS_1-2     | -976.037173              | 6.2                             |
| IM2        | -976.067279              | -12.7                           |
| TS_2-3     | -976.045699              | 0.8                             |
| IM3        | -976.077659              | -19.2                           |

**Table S14. Gibbs free energy (a.u.) and relative free energy (kcal/mol) of deprotonation product at the M06–2X/6–31 G(d,p) level.**

| Product             | Gibbs free energy (a.u.) | Relative free energy (kcal/mol) |
|---------------------|--------------------------|---------------------------------|
| Penisentene (IM4_A) | -975.7320246             | 0                               |
| IM4_B               | -975.7294146             | 1.6                             |



**IMI**

|   |          |          |          |
|---|----------|----------|----------|
| C | 2.98367  | -0.14610 | -1.51496 |
| C | 3.70622  | -1.42604 | -1.15713 |
| C | 3.56240  | -1.86187 | 0.30952  |
| C | 2.15873  | -2.06814 | 0.83370  |
| C | 1.11351  | -2.09307 | -0.00045 |
| C | -0.13806 | 0.60445  | 1.93340  |
| C | 0.94658  | 1.44691  | 1.29211  |
| C | 0.78517  | 2.13855  | 0.15867  |
| C | 1.82046  | 2.99695  | -0.51546 |
| C | 2.52541  | 2.27579  | -1.68758 |
| C | 3.37837  | 1.10555  | -1.25754 |
| C | -0.33532 | -2.14955 | 0.35767  |
| C | -1.88958 | -1.42550 | -0.85773 |
| C | -0.96808 | -0.64751 | -0.11095 |
| C | -1.34438 | 0.22158  | 1.07696  |
| C | -3.19461 | -1.89533 | -0.31572 |
| C | -4.33754 | -1.12138 | -1.04298 |
| C | -4.16101 | 0.37682  | -1.00466 |
| C | -4.48189 | 1.17711  | 0.01911  |
| C | -4.25562 | 2.66250  | -0.05315 |
| C | -5.07587 | 0.68982  | 1.31246  |
| C | -1.57767 | -1.75553 | -2.27579 |
| C | 2.23119  | 1.44687  | 2.08280  |
| C | 2.07942  | -2.26806 | 2.32288  |
| C | 4.67195  | 1.45096  | -0.56863 |
| H | 2.04879  | -0.25238 | -2.06709 |
| H | 4.77581  | -1.32159 | -1.36456 |
| H | 3.36067  | -2.23370 | -1.81189 |
| H | 4.13826  | -2.78115 | 0.48002  |
| H | 4.03324  | -1.10366 | 0.95117  |
| H | 1.30050  | -2.01488 | -1.06681 |
| H | 0.33001  | -0.30619 | 2.32841  |
| H | -0.17292 | 2.08333  | -0.36160 |
| H | 2.57075  | 3.34205  | 0.20148  |
| H | 1.33687  | 3.89613  | -0.91105 |
| H | 3.15033  | 3.00798  | -2.21336 |
| H | 1.76632  | 1.93390  | -2.40095 |
| H | -0.58089 | -2.18796 | 1.41947  |
| H | -0.81147 | -3.02682 | -0.10195 |
| H | -0.18099 | -0.19454 | -0.71584 |
| H | -2.08746 | -0.28050 | 1.70431  |
| H | -3.31163 | -2.96695 | -0.50997 |
| H | -3.26351 | -1.71582 | 0.75860  |
| H | -5.27050 | -1.42939 | -0.56442 |
| H | -4.39463 | -1.46650 | -2.07919 |
| H | -3.74048 | 0.83783  | -1.89836 |
| H | -5.20249 | 3.19959  | 0.06460  |
| H | -3.60449 | 2.99579  | 0.76372  |
| H | -3.80639 | 2.96271  | -1.00191 |
| H | -6.02457 | 1.19961  | 1.50880  |
| H | -4.41250 | 0.93926  | 2.14931  |
| H | -5.26141 | -0.38573 | 1.33161  |
| H | -0.51196 | -1.67829 | -2.49742 |
| H | -1.97090 | -2.72807 | -2.57796 |
| H | -2.08668 | -0.98888 | -2.87695 |
| H | 2.89155  | 0.64912  | 1.72105  |
| H | 2.77714  | 2.38799  | 2.00251  |
| H | 2.03760  | 1.26495  | 3.14454  |
| H | 2.44290  | -1.38182 | 2.85396  |
| H | 1.07735  | -2.50321 | 2.68558  |
| H | 2.73419  | -3.09713 | 2.61103  |
| H | 4.49889  | 2.05545  | 0.32809  |

|   |          |         |          |
|---|----------|---------|----------|
| H | 5.24094  | 0.56845 | -0.27056 |
| H | 5.30187  | 2.05119 | -1.23430 |
| H | -0.50510 | 1.13829 | 2.81956  |
| H | -1.83361 | 1.11683 | 0.67896  |

**TS\_1-2**

|   |          |          |          |
|---|----------|----------|----------|
| C | 2.75014  | -0.05807 | -1.52970 |
| C | 3.41464  | -1.40193 | -1.33201 |
| C | 3.30694  | -1.97467 | 0.08913  |
| C | 1.91667  | -2.21471 | 0.63607  |
| C | 0.84394  | -2.17421 | -0.16319 |
| C | -0.08303 | 0.51960  | 2.00860  |
| C | 1.01170  | 1.38822  | 1.42917  |
| C | 0.83774  | 2.23488  | 0.40847  |
| C | 1.90128  | 3.07755  | -0.23778 |
| C | 2.47704  | 2.40282  | -1.50543 |
| C | 3.25776  | 1.14098  | -1.22114 |
| C | -0.58830 | -2.40407 | 0.21833  |
| C | -1.72565 | -1.50748 | -0.59857 |
| C | -1.17599 | -0.28197 | -0.10605 |
| C | -1.38668 | 0.37054  | 1.19318  |
| C | -3.11243 | -1.90481 | -0.09919 |
| C | -4.22276 | -1.13298 | -0.85112 |
| C | -3.91289 | 0.33066  | -1.03747 |
| C | -4.14960 | 1.31233  | -0.15265 |
| C | -3.79399 | 2.74015  | -0.45969 |
| C | -4.77180 | 1.09112  | 1.19742  |
| C | -1.54342 | -1.74329 | -2.09733 |
| C | 2.32788  | 1.20134  | 2.13997  |
| C | 1.88574  | -2.55667 | 2.10169  |
| C | 4.62056  | 1.34003  | -0.61165 |
| H | 1.77030  | -0.06371 | -2.01091 |
| H | 4.47859  | -1.32821 | -1.57653 |
| H | 3.00181  | -2.12106 | -2.04790 |
| H | 3.85965  | -2.92241 | 0.14306  |
| H | 3.82775  | -1.30134 | 0.78363  |
| H | 1.01339  | -2.00575 | -1.22108 |
| H | 0.33160  | -0.47489 | 2.20636  |
| H | -0.14574 | 2.31666  | -0.05889 |
| H | 2.71265  | 3.29427  | 0.46229  |
| H | 1.47333  | 4.04296  | -0.52515 |
| H | 3.12739  | 3.12558  | -2.01266 |
| H | 1.65275  | 2.17925  | -2.19305 |
| H | -0.77956 | -2.32557 | 1.29060  |
| H | -0.93531 | -3.39302 | -0.11023 |
| H | -0.35987 | 0.15017  | -0.69468 |
| H | -2.17086 | -0.11274 | 1.77764  |
| H | -3.24368 | -2.98213 | -0.24445 |
| H | -3.19396 | -1.72110 | 0.97669  |
| H | -5.15900 | -1.26863 | -0.30327 |
| H | -4.37821 | -1.59339 | -1.83056 |
| H | -3.48805 | 0.62119  | -1.99899 |
| H | -4.68407 | 3.37602  | -0.40836 |
| H | -3.09438 | 3.13937  | 0.28761  |
| H | -3.34878 | 2.85040  | -1.45050 |
| H | -5.72367 | 1.62863  | 1.26530  |
| H | -4.13077 | 1.50630  | 1.98512  |
| H | -4.95944 | 0.03983  | 1.42246  |
| H | -0.55851 | -1.43375 | -2.45147 |
| H | -1.67708 | -2.80408 | -2.32533 |
| H | -2.28841 | -1.18066 | -2.66210 |
| H | 2.89414  | 0.39033  | 1.66775  |
| H | 2.94859  | 2.09756  | 2.11592  |

|   |          |          |          |
|---|----------|----------|----------|
| H | 2.17064  | 0.93363  | 3.18963  |
| H | 2.32104  | -1.74736 | 2.69843  |
| H | 0.88728  | -2.77402 | 2.48571  |
| H | 2.50386  | -3.44272 | 2.28120  |
| H | 4.56309  | 1.93507  | 0.30608  |
| H | 5.11776  | 0.40007  | -0.36647 |
| H | 5.26410  | 1.89419  | -1.30377 |
| H | -0.37452 | 0.91858  | 2.98789  |
| H | -1.73892 | 1.38434  | 0.94864  |

**IM2**

|   |          |          |          |
|---|----------|----------|----------|
| C | -2.66667 | 0.04893  | -1.36129 |
| C | -3.30463 | 1.40962  | -1.19571 |
| C | -3.13829 | 2.03279  | 0.19650  |
| C | -1.73845 | 2.42599  | 0.61427  |
| C | -0.70629 | 2.38605  | -0.23650 |
| C | 0.93154  | -1.29110 | 1.74695  |
| C | -0.47625 | -1.65678 | 1.33031  |
| C | -0.69127 | -2.64576 | 0.45492  |
| C | -2.01100 | -3.17288 | -0.03637 |
| C | -2.53326 | -2.43476 | -1.29123 |
| C | -3.21382 | -1.11775 | -1.00021 |
| C | 0.72306  | 2.75901  | 0.03785  |
| C | 1.73993  | 1.80186  | -0.61921 |
| C | 1.55583  | 0.32361  | -0.15901 |
| C | 1.37132  | 0.12439  | 1.34112  |
| C | 3.17692  | 2.13722  | -0.18648 |
| C | 3.99773  | 0.84694  | -0.40215 |
| C | 2.97808  | -0.26730 | -0.71978 |
| C | 3.22519  | -1.60756 | -0.25534 |
| C | 2.68140  | -2.74102 | -1.02669 |
| C | 4.12161  | -1.88756 | 0.88215  |
| C | 1.62903  | 1.90313  | -2.15132 |
| C | -1.56904 | -0.86211 | 1.99026  |
| C | -1.64832 | 2.89233  | 2.04454  |
| C | -4.56726 | -1.23269 | -0.34639 |
| H | -1.69410 | 0.01254  | -1.85417 |
| H | -4.37663 | 1.33411  | -1.40068 |
| H | -2.91072 | 2.09529  | -1.95320 |
| H | -3.77597 | 2.92398  | 0.27388  |
| H | -3.52909 | 1.32950  | 0.94641  |
| H | -0.90864 | 2.07890  | -1.25955 |
| H | 1.01174  | -1.36979 | 2.83870  |
| H | 0.18444  | -3.15009 | 0.04383  |
| H | -2.76380 | -3.12999 | 0.75691  |
| H | -1.88849 | -4.23256 | -0.27952 |
| H | -3.25373 | -3.08907 | -1.79794 |
| H | -1.70102 | -2.27926 | -1.98784 |
| H | 0.92247  | 2.82455  | 1.11050  |
| H | 0.93569  | 3.75873  | -0.36607 |
| H | 0.73357  | -0.17231 | -0.69004 |
| H | 0.58871  | 0.81882  | 1.66664  |
| H | 3.57765  | 2.97969  | -0.75574 |
| H | 3.19575  | 2.42520  | 0.86893  |
| H | 4.59530  | 0.61683  | 0.48237  |
| H | 4.69683  | 0.92983  | -1.23839 |
| H | 2.77263  | -0.33497 | -1.79389 |
| H | 3.48727  | -3.01339 | -1.73100 |
| H | 2.48671  | -3.62160 | -0.41290 |
| H | 1.81025  | -2.46161 | -1.62276 |
| H | 4.01855  | -2.90102 | 1.26765  |
| H | 4.00444  | -1.14633 | 1.67829  |
| H | 5.14853  | -1.75795 | 0.50291  |

|   |          |          |          |
|---|----------|----------|----------|
| H | 0.75920  | 1.36360  | -2.53862 |
| H | 1.52998  | 2.95109  | -2.44678 |
| H | 2.51853  | 1.52107  | -2.66208 |
| H | -2.55183 | -1.31265 | 1.84467  |
| H | -1.38542 | -0.76551 | 3.06630  |
| H | -1.60807 | 0.14403  | 1.56185  |
| H | -2.04861 | 2.13137  | 2.72415  |
| H | -0.63481 | 3.13953  | 2.36331  |
| H | -2.26388 | 3.78784  | 2.18263  |
| H | -4.51793 | -1.82131 | 0.57653  |
| H | -5.00244 | -0.26512 | -0.09474 |
| H | -5.26348 | -1.75746 | -1.01050 |
| H | 1.61924  | -2.04984 | 1.34678  |
| H | 2.27879  | 0.41771  | 1.88611  |

**TS\_2-3**

|   |          |          |          |
|---|----------|----------|----------|
| C | 2.44718  | 0.10793  | -1.40595 |
| C | 3.11723  | -1.25047 | -1.41931 |
| C | 3.13937  | -1.98742 | -0.06865 |
| C | 1.82008  | -2.48538 | 0.48948  |
| C | 0.70196  | -2.51307 | -0.24412 |
| C | -0.96265 | 1.21251  | 1.64176  |
| C | 0.41021  | 1.61624  | 1.42814  |
| C | 0.64662  | 2.81919  | 0.84785  |
| C | 1.95662  | 3.27593  | 0.29234  |
| C | 2.27792  | 2.57479  | -1.06781 |
| C | 2.99567  | 1.24626  | -0.95820 |
| C | -0.69416 | -2.90633 | 0.17085  |
| C | -1.72456 | -1.95467 | -0.46272 |
| C | -1.46447 | -0.47520 | -0.12683 |
| C | -1.35879 | -0.19333 | 1.42489  |
| C | -3.17775 | -2.12899 | 0.03002  |
| C | -3.86552 | -0.75341 | -0.22078 |
| C | -2.73232 | 0.22597  | -0.63799 |
| C | -2.78526 | 1.70443  | -0.22815 |
| C | -2.55777 | 2.65809  | -1.39561 |
| C | -3.93639 | 2.13248  | 0.66600  |
| C | -1.70865 | -2.13571 | -1.99835 |
| C | 1.48204  | 0.61457  | 1.78434  |
| C | 1.90717  | -2.95234 | 1.91865  |
| C | 4.39022  | 1.32358  | -0.38981 |
| H | 1.44345  | 0.16564  | -1.83080 |
| H | 4.15545  | -1.13429 | -1.74567 |
| H | 2.64511  | -1.88216 | -2.17770 |
| H | 3.82367  | -2.84321 | -0.14175 |
| H | 3.59056  | -1.32324 | 0.68387  |
| H | 0.78606  | -2.19650 | -1.28122 |
| H | -1.62339 | 1.88332  | 2.19443  |
| H | -0.21422 | 3.45620  | 0.63679  |
| H | 2.76818  | 3.09117  | 1.00272  |
| H | 1.90908  | 4.35468  | 0.13162  |
| H | 2.91751  | 3.26257  | -1.63328 |
| H | 1.35234  | 2.45989  | -1.64227 |
| H | -0.80407 | -2.91403 | 1.26092  |
| H | -0.92343 | -3.92754 | -0.16063 |
| H | -0.54515 | -0.09714 | -0.59412 |
| H | -0.56758 | -0.84428 | 1.81621  |
| H | -3.68052 | -2.94577 | -0.49367 |
| H | -3.19440 | -2.38204 | 1.09568  |
| H | -4.38410 | -0.41788 | 0.68060  |
| H | -4.62449 | -0.81368 | -1.00399 |
| H | -2.65993 | 0.22224  | -1.73061 |
| H | -3.41715 | 2.61790  | -2.07345 |

|   |          |          |          |
|---|----------|----------|----------|
| H | -2.45047 | 3.69168  | -1.05605 |
| H | -1.66709 | 2.37806  | -1.96663 |
| H | -3.86345 | 3.19409  | 0.91657  |
| H | -3.98027 | 1.55809  | 1.59694  |
| H | -4.88695 | 1.97778  | 0.14518  |
| H | -0.87636 | -1.61026 | -2.47718 |
| H | -1.62194 | -3.19763 | -2.24403 |
| H | -2.63285 | -1.77563 | -2.45699 |
| H | 2.46886  | 1.06971  | 1.71314  |
| H | 1.33702  | 0.26788  | 2.81279  |
| H | 1.45876  | -0.24692 | 1.11577  |
| H | 2.27914  | -2.15173 | 2.56939  |
| H | 0.95633  | -3.31176 | 2.31456  |
| H | 2.62777  | -3.77344 | 1.99879  |
| H | 4.38943  | 1.61235  | 0.66853  |
| H | 4.92527  | 0.37648  | -0.46269 |
| H | 4.97424  | 2.08521  | -0.91769 |
| H | -1.83000 | 1.83850  | 0.39850  |
| H | -2.30442 | -0.42834 | 1.91713  |

**IM3**

|   |          |          |          |
|---|----------|----------|----------|
| C | -2.50416 | -0.40337 | -1.49688 |
| C | -3.05369 | 0.97902  | -1.75065 |
| C | -3.12995 | 1.87226  | -0.50386 |
| C | -1.83118 | 2.30440  | 0.13581  |
| C | -0.62606 | 2.00983  | -0.38668 |
| C | -0.09277 | 0.09836  | 1.66092  |
| C | -1.17884 | -0.79099 | 1.61165  |
| C | -1.00357 | -2.00498 | 0.98555  |
| C | -2.07148 | -2.97309 | 0.67880  |
| C | -2.48735 | -2.77763 | -0.82140 |
| C | -3.19235 | -1.46127 | -1.05362 |
| C | 0.71153  | 2.51899  | 0.08309  |
| C | 1.88725  | 1.68125  | -0.44305 |
| C | 1.77649  | 0.16174  | -0.14824 |
| C | 1.32127  | -0.16973 | 1.31850  |
| C | 3.21656  | 2.07083  | 0.24292  |
| C | 4.10050  | 0.80254  | 0.21987  |
| C | 3.23096  | -0.33015 | -0.37244 |
| C | 3.61265  | -1.73539 | 0.10521  |
| C | 2.75092  | -2.80661 | -0.56534 |
| C | 5.09079  | -2.01358 | -0.18476 |
| C | 2.01738  | 1.89935  | -1.96247 |
| C | -2.50880 | -0.38041 | 2.19195  |
| C | -1.99853 | 3.21050  | 1.32797  |
| C | -4.66463 | -1.45065 | -0.73625 |
| H | -1.44379 | -0.55607 | -1.70690 |
| H | -4.06215 | 0.90171  | -2.16704 |
| H | -2.45130 | 1.47711  | -2.51714 |
| H | -3.67687 | 2.79005  | -0.76253 |
| H | -3.75007 | 1.38195  | 0.25936  |
| H | -0.60328 | 1.41772  | -1.29792 |
| H | -0.31187 | 1.06681  | 2.10513  |
| H | -0.01470 | -2.24872 | 0.60034  |
| H | -2.94179 | -2.84105 | 1.32553  |
| H | -1.68978 | -3.99198 | 0.79547  |
| H | -3.14019 | -3.61883 | -1.07495 |
| H | -1.59514 | -2.85627 | -1.45070 |
| H | 0.75875  | 2.57790  | 1.17885  |
| H | 0.85488  | 3.55378  | -0.25713 |
| H | 1.06689  | -0.33090 | -0.82689 |
| H | 1.94706  | 0.41469  | 2.00369  |
| H | 3.68199  | 2.91916  | -0.26601 |

|   |          |          |          |
|---|----------|----------|----------|
| H | 3.03263  | 2.39405  | 1.27389  |
| H | 4.42083  | 0.53642  | 1.23408  |
| H | 5.01294  | 0.94295  | -0.36343 |
| H | 3.36571  | -0.34223 | -1.46222 |
| H | 3.48060  | -1.79120 | 1.19616  |
| H | 2.92220  | -2.80602 | -1.64718 |
| H | 2.99426  | -3.80338 | -0.18920 |
| H | 1.67815  | -2.64221 | -0.41328 |
| H | 5.35794  | -3.02957 | 0.11687  |
| H | 5.74797  | -1.32299 | 0.34860  |
| H | 5.29502  | -1.91787 | -1.25691 |
| H | 1.19967  | 1.43366  | -2.52201 |
| H | 2.00869  | 2.97050  | -2.18311 |
| H | 2.95528  | 1.49833  | -2.35244 |
| H | -2.48625 | 0.66297  | 2.51233  |
| H | -3.30837 | -0.49572 | 1.45743  |
| H | -2.75320 | -0.99391 | 3.06415  |
| H | -2.88012 | 2.93885  | 1.91646  |
| H | -1.12561 | 3.22453  | 1.98679  |
| H | -2.15261 | 4.24178  | 0.98948  |
| H | -4.86280 | -1.89423 | 0.24713  |
| H | -5.09156 | -0.44661 | -0.74151 |
| H | -5.21403 | -2.05636 | -1.46521 |
| H | 1.53646  | -1.22596 | 1.49226  |

## Sequence S1. The protein sequence of PstA

MDTNLRFTMSEYVIPISGDLRQAGVISIFPAALHRDHAVEDARELRYEFSSEVNMDVDTK  
TISDIPGFGLCHVTSLAMPQCRPERLSLLTVFTETTFLN **DDYYD**SAGAEKIDSYNQRLKKALS  
RDSQGNESDKNPGMYKQKQLQAGYLIQMLQIDHDLASAVMATYSRTLDAVSVSVLEKSGLV  
SLEDYCNFRLSNSGMETFQDMCCFGIGLKIDQKTKEKLAIVNAAHKSTALI **NDYYSWPKE**V  
KGYFEVDENPNLPVNAVCIIMQYHEFSEREALKRIRDEIVVQQELHLSMIKELEESEGPLPES  
WRIYLEAAQYPATGSELWTIYSPRYPTKSDLNQPECIIVGNSMKYKTTYDIPCGLTERGSEVET  
RQDIMAGMNSHPVSHLSTPYLAADSEKTADFNSFSTVACAAENLGEVTNNGKENGIIQPPGN  
GQNKNDISASAHGDCESSYKEGLCSHQQRDSNIFLQKATETVTSKSYIASLPSKNVRDKF  
LDALNLWFRIPPEPLSRIKRIVGLLHHSSLML **DDIED**DSTLRRGMPCAHSLYGPAQTINSANYA  
FVTAFAETLSLRNSSATDMFIDEVQNMHRGQAMDLHWKYHHCPTADEYMQMIDNKTGA  
MFRLCVRLMQAESNLGQNISDPFVLQLGRYFQVRDDYQNLSDSEYSSQKGFCELDDEGK  
ISLPIYTIMNPSFNQSVIKGIFQHKVPGEMPLPTKKYILEQMKQAGALDMLSLIRDMQSDLL  
DKLSAVEDAFGSKNPLVELVLRRLWI\*

## Sequence S2. The nucleotide sequence of *pstA* gene

ATGGACACCAATCTGAGATTCACAATGTCGGAATACGTAATCCCCATTTCTGGGGACACTC  
TCCGGCAAGCAGGTGTAATTTCCATATTCCTGCAGCTCTTACCAGGACCATGAGCTTGC  
TGTCGAAGACGCACGCGAACTTAGATACGAGTTCAGTTCTGAGGTCAACATGGATGTGG  
ACACCAAGACTATCTCTGATATTCAGGATTTGGCCTTTGTCATGTCACTTCTTTGGCAAT  
GCCTCAGTGTGCGCCAGAAAGGCTATCCCTGCTGACGGTCTTCACTGAGACCACGTTCTC  
CAATGATGGTGAGTTGCAATGACTCCATACTTACAGTCAATAGTCGAAACGTGGGTAAC  
ATATAGGTCTAGATTACTATGACAGTGCAGGCGCCGAGAAGGTACGCACAACTCTTACC  
ATGAGATTTCTCCGCCGCTCTGTTGACAAATGACCCGTGTACCAGATCGATAGTTATAAC  
CAGCGACTGAAAAAGGCTTTGAGCAGGGATAGCCAGGGGAATGAATCTGATAAAAACCC  
TGGTATGTACAAAGGAAGCAGCTCCAAGCGGGCTATCTCATTCAAATGCTCCAAATCGA  
TCATGACCTGGCATCCGCGGTTATGGCAACTTATAGCAGAACCCTGGATGCAGTCAGTGT  
AAGCGTTCTTGAAAAATCGGGCCTTGTCAGTCTTGAAGACTATTGCAATTTTCGCCTTTCA  
AATTCAGGCATGGAGTAAGAGCCCGTCGATCCCACTGTATGAGTCTCCGTCTCAAATTCTC  
CTAACTTGCATCCAGAACATTTTCAGGATATGTGCTGCTTTGGCATTGGTCTCAAGATAGA  
TCAAAAAACAAAGGAAAAGCTAGCCTCGATTGTCAATGCCGCCACAAGTCCACAGCCT  
TGATCAATGACTACTATAGCTGGCCAAAAGAGGTTAAGGGGTATTTTGAGGTGCGATGAAA  
ACCCCAATCTCCCTGTGAATGCAGTTTGCATTATGATGCAATACCATGAATTCTCGGAGAG  
AGAGGCTTTGAAGAGGATTAGAGATGAGATCGTCGTTCAACAAGAGCTGCATCTGTCAAT  
GATCAAAGAGCTGGAAGAGAGTGAGGGCCCACTTCCAGAATCCTGGCGGATTTATCTTG  
AGGCAGCTCAATACCCAGCGACTGGCTCTGAGCTATGGACCATTACAGCCCTCGTTATCC  
GACAAAGTCTGATCTGAATCAGCCAGAATGTATCATTGTGGGTAACAGCATGAAGTACAA  
GACTACATATGATATCCCATGTGGATTAACGGAAAGGGGGTCGGAAGTGGAACCAGACA

AGACATCATGGCAGGCATGAATTCTCACCCGGTTTCCCACCTTTCCACTCCTTATTTGGCT  
GCTGACAGTGAGAAAAGTGCAGACTTCAACTCTTTTTCCACGGTTGCTTGTGCAGCAGA  
GAATCTTGGGGAAGTCACAAATGGCGGGAAAGAGAATGGTATCCAGCCTCCAGGAAATG  
GTCAAAACAAGAATGACATCAGTGCCTCAGCTCATGGGGACTGCGAATCCAGTTCCTATA  
AGGAAGGTTTGTGTTTCGCATCAGCAGCCGAGAGACAGTAATATCTTCCTGCAGAAAGCA  
ACCGAGGTTAGTCTTCTATATCCAAGTGGAGGTCTTGATAGGAATCTCAATAGCAAACAG  
ACTGTAACATCTCCGTCCAAATACATCGCTTCCCTCCCATCCAAAATGTCAGGGACAAG  
TTCTTGGACGCTTTGAATCTATGGTTCAGAATTCCCAGAAGAACCTCTCTCGAGGATCAA  
AGAATCGTCGGCCTGCTCCACCATTTCTTATTGATGTAGGTCTATCCCCTTTGCCATCTTCT  
TTGATGTGCCTGATTGCTCAAATATTGGCTATAAGGCTGGATGATATCGAAGACGACAGCA  
CGCTTCGTCGGGGAATGCCATGCGCACACTCTCTTTATGGGCCAGCCCAAACAATCAACT  
CAGCAAACATATGCCTTTGTAACGGCATTGCGGAGACGCTGAGCCTGAGGAATTCATCTG  
CGACAGATATGTTTCAATGGTAAGATAAATCAATTCTTGTCTGCGCCCCCTGACTGTCGATT  
ACTGAAAATGGAATTTACAGATGAGGTTTCAAGATATGCACCGTGGTCAAGCCATGGATTT  
ACATTGGAAGTACCACACACACTGTCCGACCGCAGATGAGTACATGCAGATGATAGATAA  
TAGTAAGTCATACCTGAGCTGGAGCTATTGCGCTCAAGTCTGAATTCTGACATCTTCTTGC  
AGAGACTGGAGCGATGTTCCGCTTGTGTGTGAGATTAATGCAAGCTGAATCCAACCTTGC  
TGGGTGAGCAGATCTGAATCAGGACCAGCGGTTTACCAGCGCGCATTGCTGAATTACGGA  
TAGTCAAATATAAGTCCCGACCCTTTTGTGCTACAGTTAGGCCGGTACTTCCAAGTGAG  
AGACGATTACCAAATCTGCTTTCCGATGAAGTGAGTCAAATTTGAAGATTTCAAATATC  
CTTACGCTCTTTCAGCTATCCCTGCCTATCACGATATGAAGGTATAACGGGATTCAGAAAA  
TATTGCTGACAAAAGTGTAAAATGCACAGTATTCAAGTCAAAGGGTTTCTGTGAGGACC  
TCGACGAGGGAAAAATCTCCCTACCAATCATATATACCATCATGAACCCATCGTTCAACGG  
ATCTGTGATTAAGGGCATCTTCCAACATAAGGTGCCCGGCGAAATGCCTCTCCCTACGAA  
GAAGTATATTCTAGAGCAGATGAAACAGGCAGGGGCACTGGATATGACTCTTTCATTGATT  
CGCGATATGCAGAGTGATCTTCTGGACAAACTCAGTGCTGTGGAAGATGCGTTTGGGTCCG  
AAGAATCCTCTTGTGCGAGCTGGTGTGAGGCGCCTATGGATATGA

**Sequence S3. The nucleotide sequence of *pstB* gene**

TCAGGCAGTGACTTCAACCCGAGGACGCTCGAGAGAACTTTTCTCAAGCTCGTTCTTTTC  
ATCATTCTTCAAAGCCCAGGGTTCACGAGTTTTTCAGGTTGATCCAGACATCACGCCATGCT  
AACGTCGAGCCGTGAGGTTGGACAAAGTGGGCTTTAGGTGTGGCAGGTGTCTCCCTGCA  
CAGACTAGCCTCGAACTTCATCAAGAGCTATAGAGATATAAGTGTGAGAAAACAAAGTCA  
AATCAATCTGACGATAGTGGAAACCAGGATTAACCCACTGAGATAGGAGTTTTGTATAGCAT  
CATCTGAGCAAAGTTTTTGGCAAGGCAGATCCGGGATCCATATCCCCAAGCAAGGTTGTA  
CTTCTCAAGTATCCTAACCTGCTCGGGATCACCCAACCAACGGTCGGGGCGAAACTCTTC  
TGCGTCTCCCATATATTGCCTTATCTCGATGGATAATCCAGGGATTTGCTGCAACCTCGA  
TTCCAGGAGGAATCTTGAACCCGTTAAGGACTATTTCAAGCCCGTCTGCGGTGGTACTC  
GAGGGAGTTGAGCTGCTGCAAAGGCATGAACGCGCATGGTTTCACGGACACAAGCTAGG  
AAGAACGGAAGATTTTTGAGAAACTTCCATGTAAGTAGGCACTGGCTGAGAGAGCTTGCC  
TGCTCCGCTGCGACCTTGATCTCTGCCATCAGACGCTTGAAAATGATGGGACGCGCCAG  
AACCTCAGCGAAAAAGCGGATGTGGTTCGAGCTAACGCCTTCGGGACCAGCACCTAAGA

TCACAAAATCTCAGTTTGGATAGCGTCATCTGTTAGGTGATCACCGTCTGGGGTACGTGT  
ATCCAAGAACTTCCATAAGCAGCAATCATTAGCTAATTTTGAAGGGATATGAGTGGGAA  
ATAGTGCAGTACTCACGCCTGGAGAAAGTCATAAGACCTATCACCTTTCTGAGGGTTGAC  
TGTGTGGCCCTCGGTGAGACCCAATGTACGTTTCATCGAGGACTTTTTTGGCATGCTGGAA  
CATGGCTCCAAACCCTCGCGTCTGATCGGGTCGTACCACAAGGTATTTTCCCGGCCACGT  
ATGGGGAAGCCATCTAAAAAATGTATAAAGACGCCCTGCAATCCCAAATGCGATAGCTCC  
CAGTCTGAACTGTTCCATAAGTCCACCAACATCGCTTCCTGATTCAATGCATCCAAAGGG  
ATTACGGAATGCCAGATCGGTGATGGAATCATATGATAGAAAAGCGCCCCACTCAGGATAA  
TCAAGAGGCTTGTGAGCATCAGCAAAGTCGTGCTTGATCTTATTGAGCCATTTCAAGATG  
TGCTTGTCCAGCAAAGGCTCCATTCTCATGACATTGGTTAATGAATAGGTGGATCCGACTA  
GGCGTCGATGGGCTGCATGTTCTGTGGGATCTTTGATCAAGAGAGCCCCTGGCATTTCAA  
AGTAGTCAGACATATAGATTTGGCCTTTCACGTCTCGACGATGGAAAATGGTGGGTAGGA  
GGGTACTATCGGTAACCAAGAGCATTGTTGGCGAGATGCGGACAACCGGACCTATGCCTC  
TGTGAGTTGAACATTCCAAGATATGTAAAATCGGGACTTCCCATCAGCCATACCGTATTTT  
TTGACCGCCTGCCACTGTGCATTTAGCTCATTGCCTCGAACAAAGTGCCACGCCTGCCAT  
AGTCGAGTGACGCTGGCCCAGAATGGACCAGGGAAACGTTTCAATGGATGGAAAAGCCT  
GTAGTAAACAATTTGGGATAGAAATTGAATCACAACAAGCCCCATAATCGAGAAAAAGAT  
ATTGGTAATTGTGACGAGTTTGAACGTGTTAGCAAAGCTTGGAGCACTAGCAGAGAATC  
GAATCCATTAAGGTAGGCAT

Figure S19. <sup>1</sup>H NMR spectrum of Penisentene (1) in CDCl<sub>3</sub>.

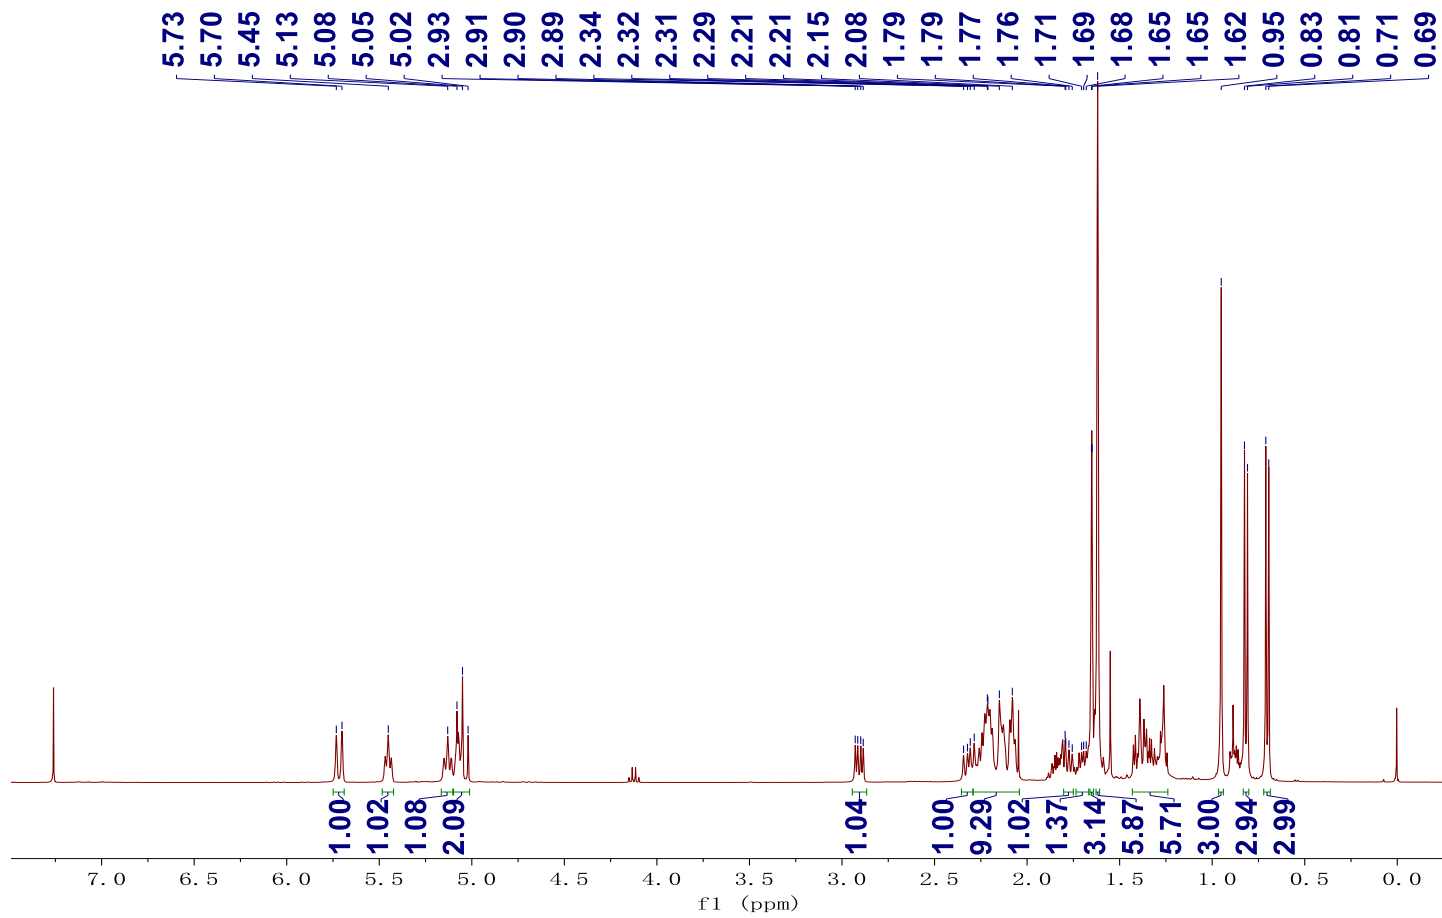

Figure S20.  $^{13}\text{C}$  NMR and DEPT spectra of Penisentene (1) in  $\text{CDCl}_3$ .

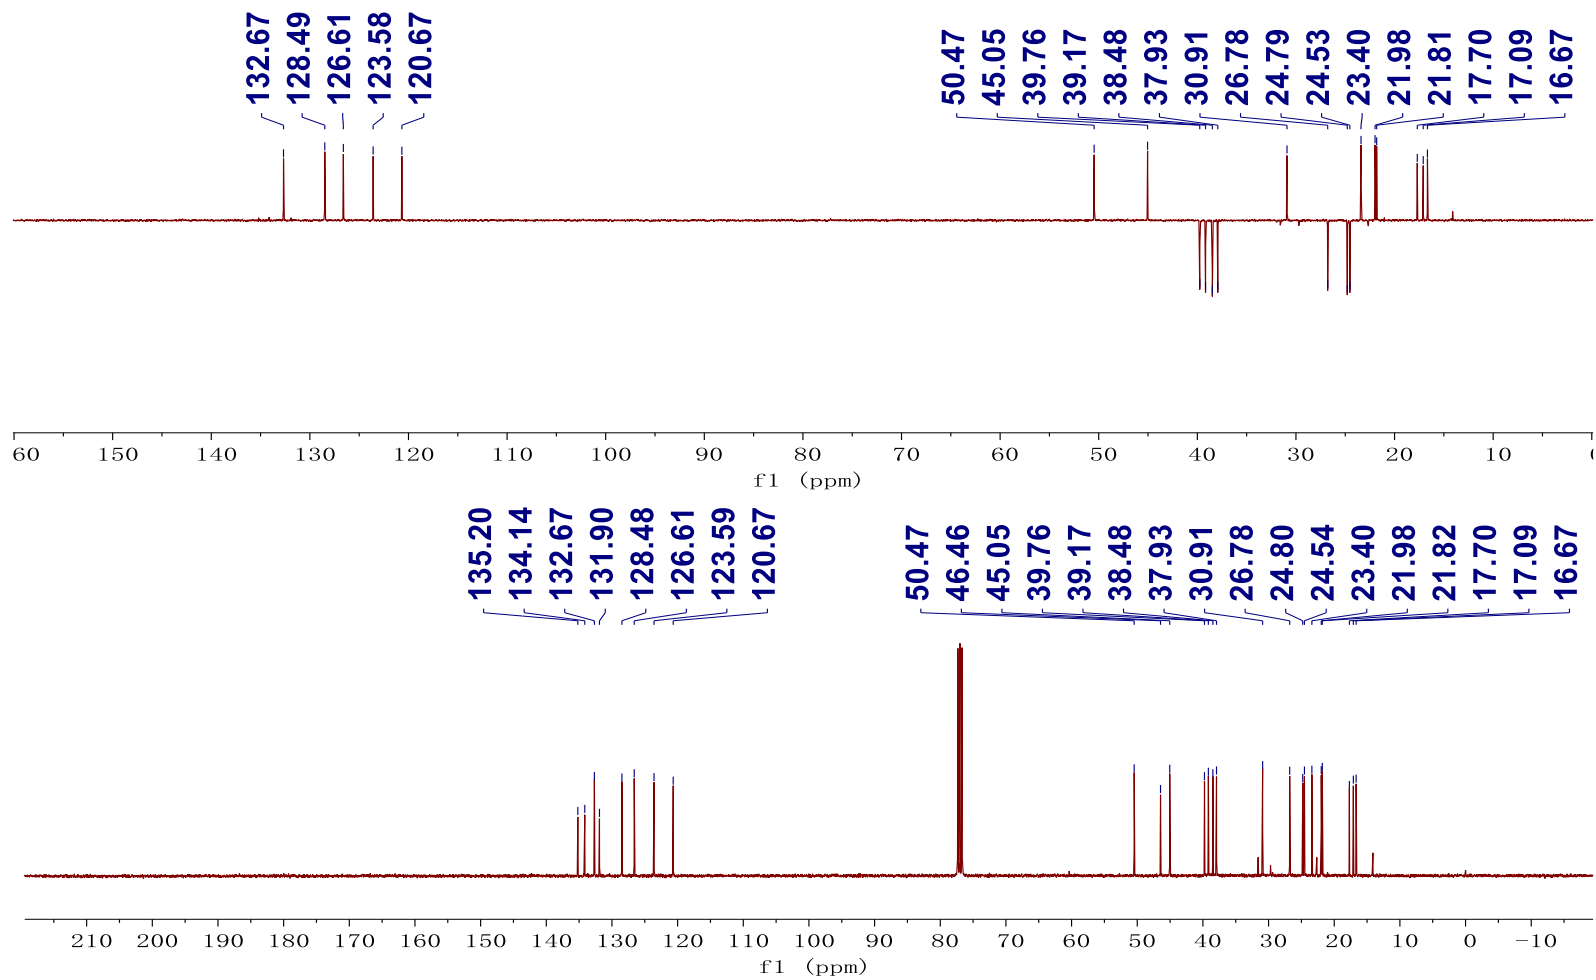



Figure S21. HSQC spectrum of Penisentene (1) in CDCl<sub>3</sub>.

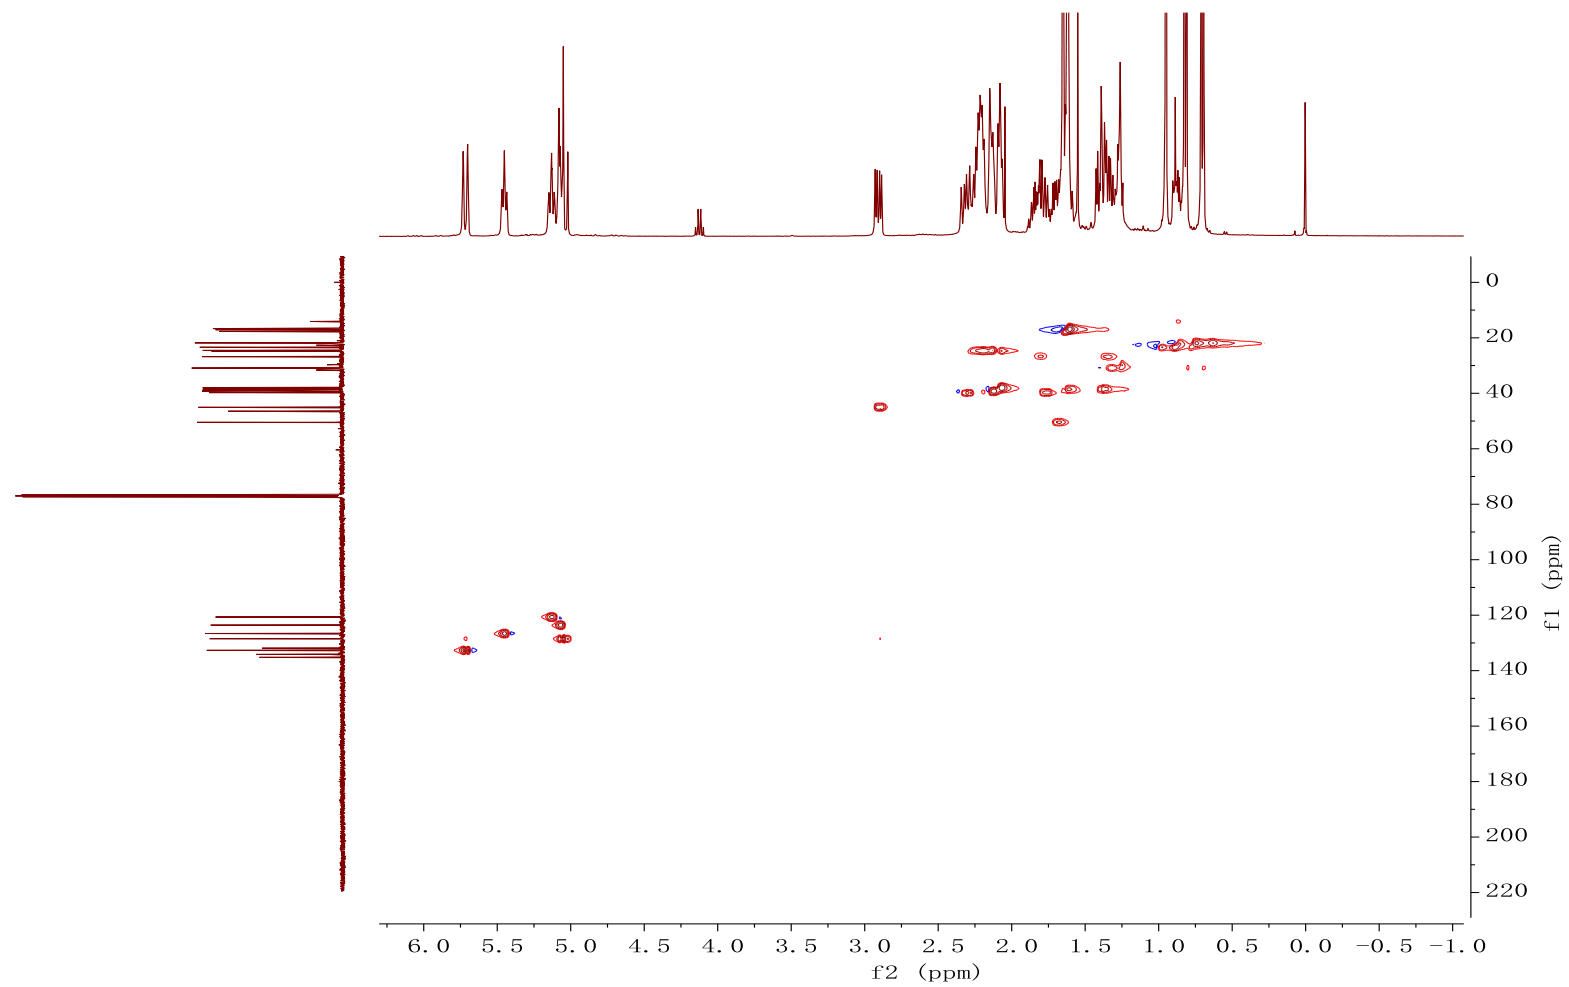

Figure S22. HMBC spectrum of Penisentene (1) in CDCl<sub>3</sub>.

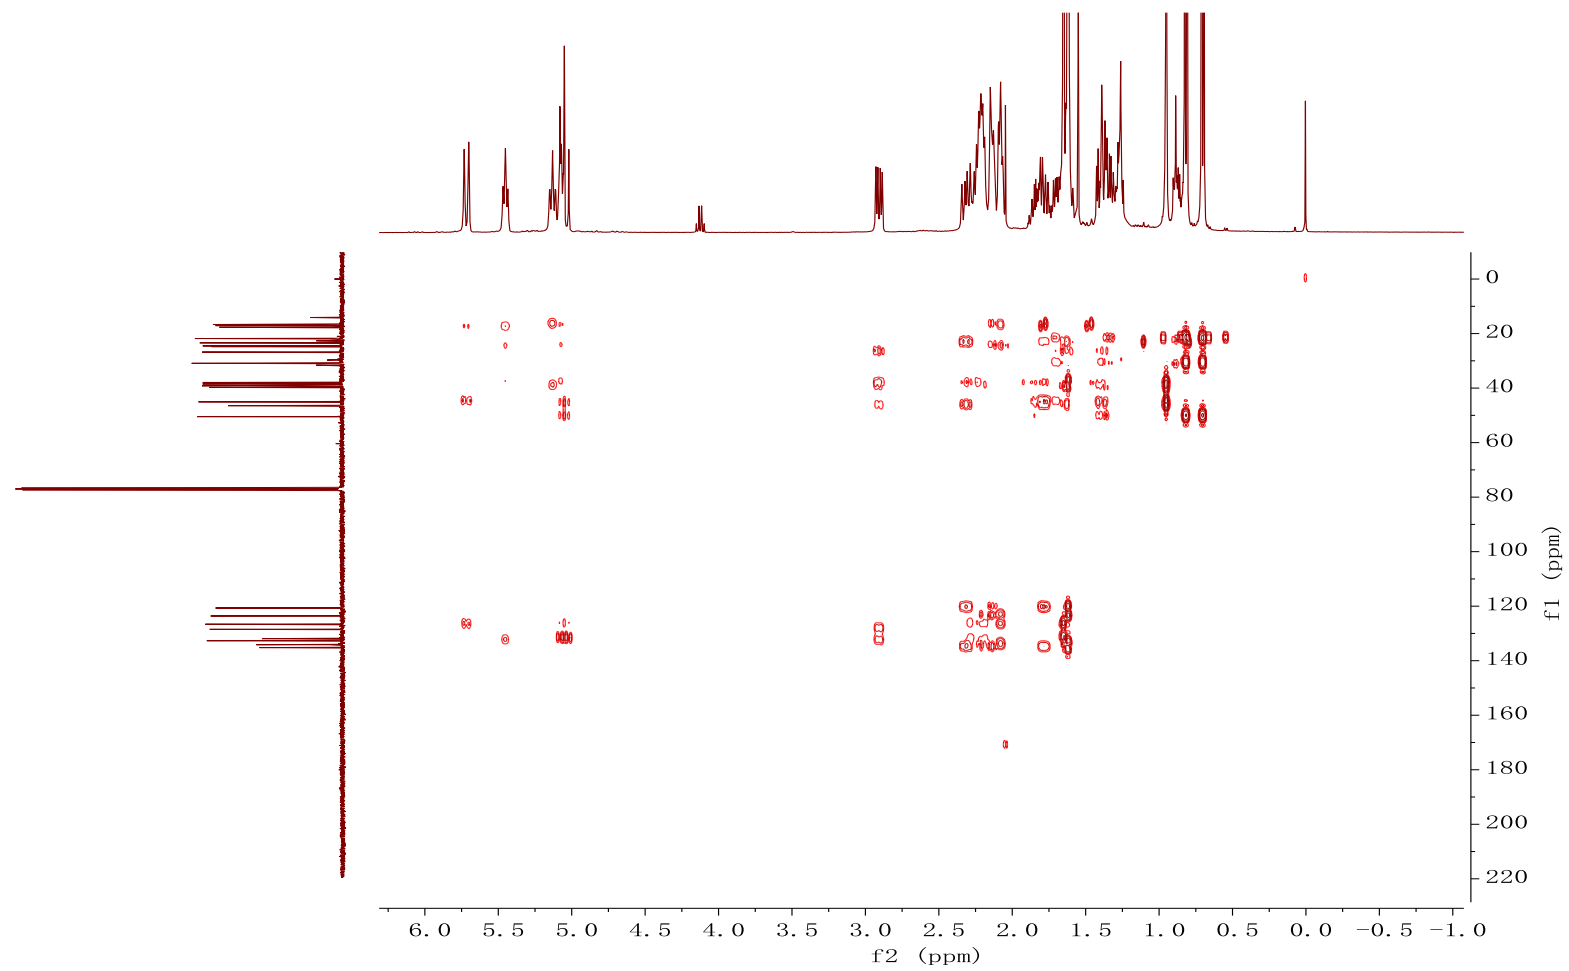

Figure S23.  $^1\text{H}$ - $^1\text{H}$  COSY spectrum of Penisentene (1) in  $\text{CDCl}_3$ .

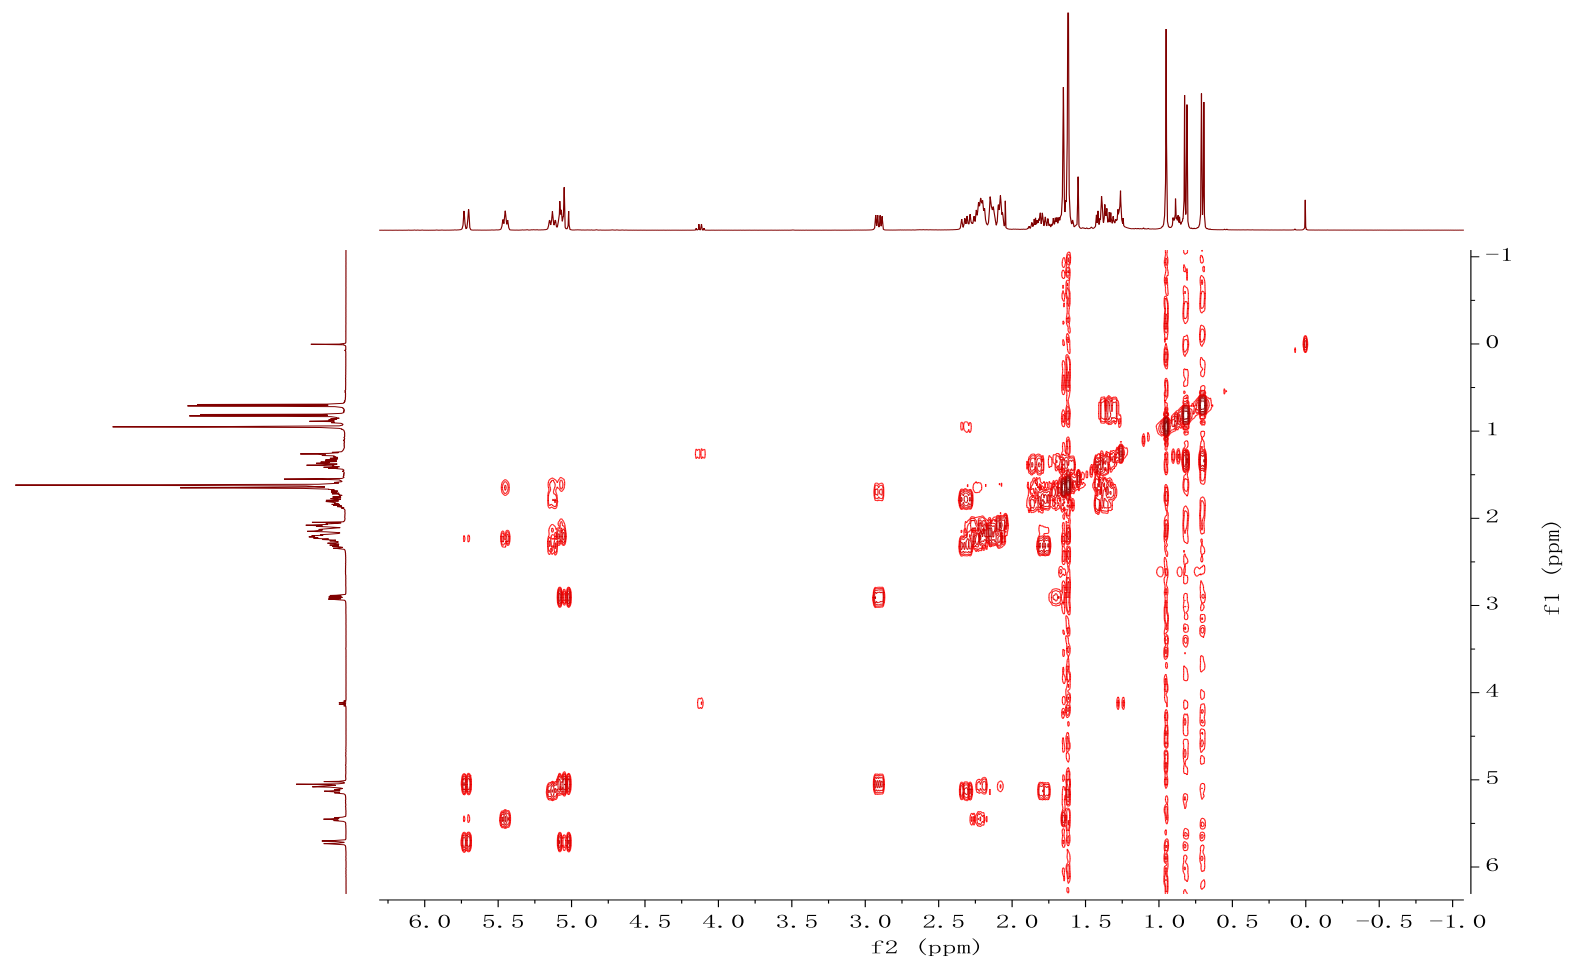

Figure S24. NOESY spectrum of Penisentene (1) in CDCl<sub>3</sub>.

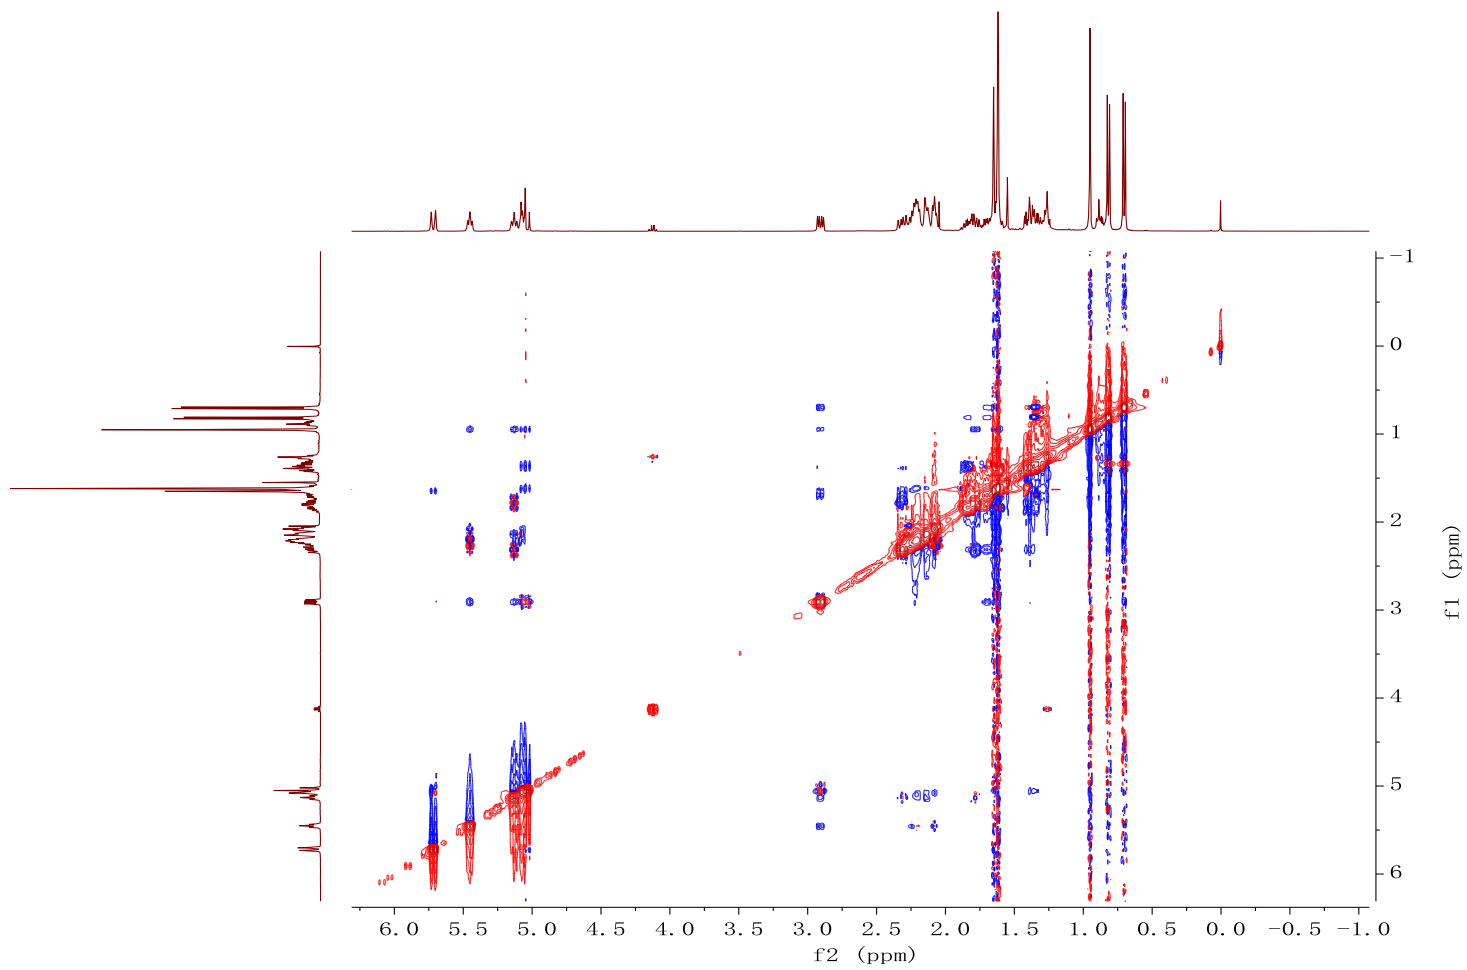

Figure S25.  $^1\text{H}$  NMR spectrum of Penisentenol (2) in  $\text{CDCl}_3$ .

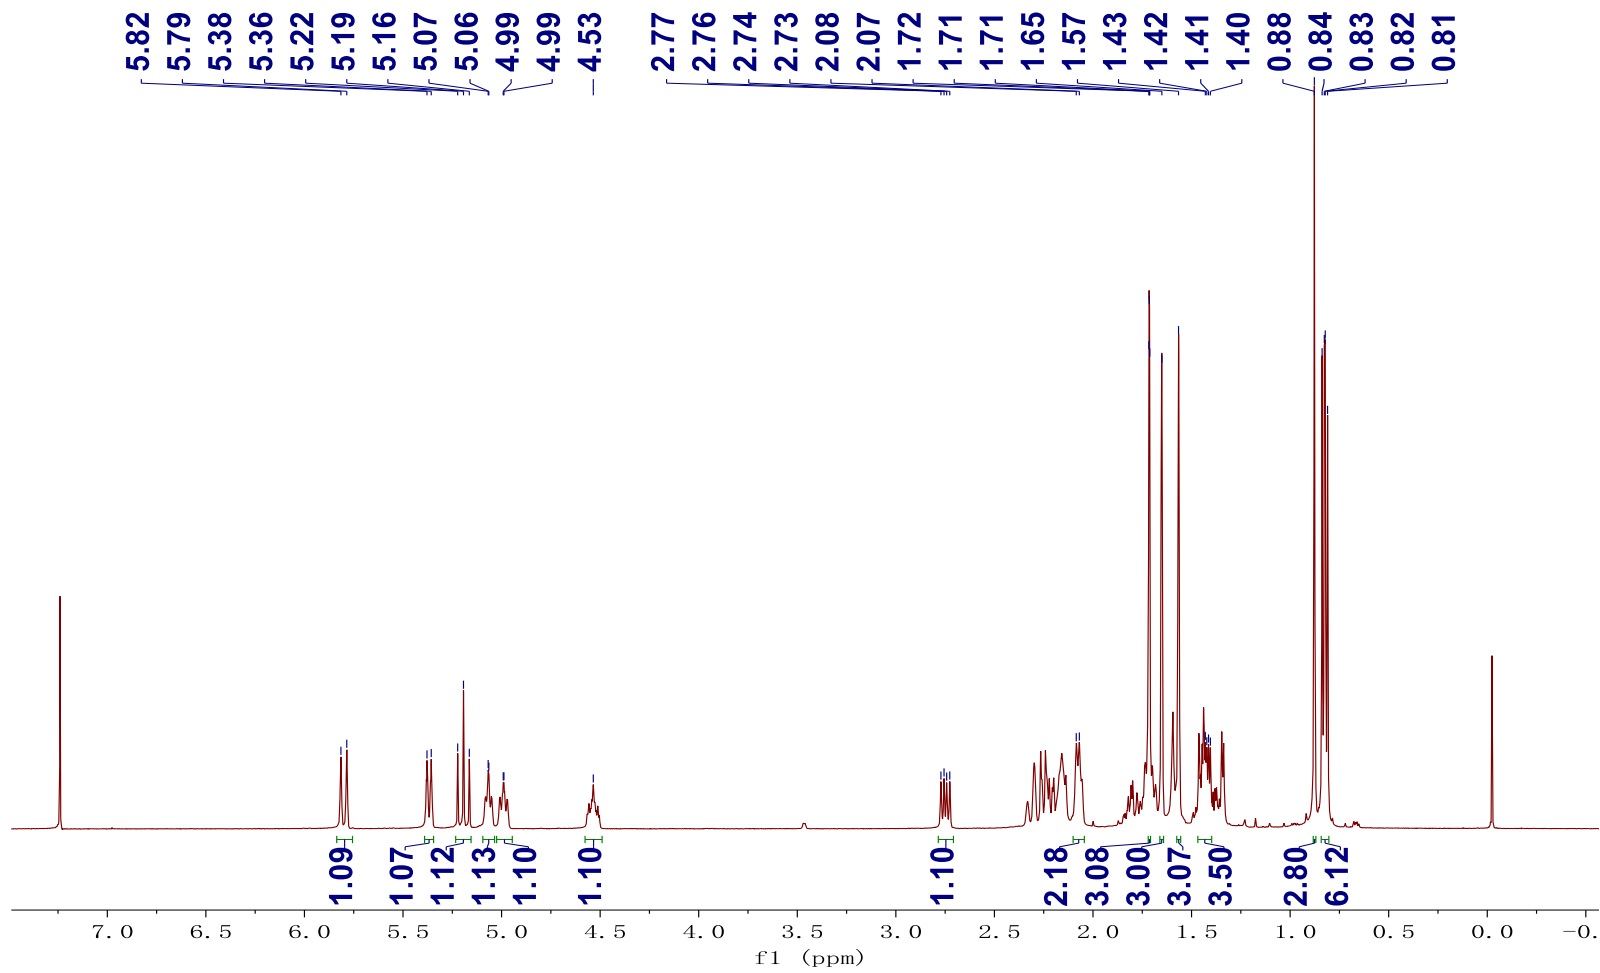

Figure S26.  $^{13}\text{C}$  NMR and DEPT spectra of Penisentenol (2) in  $\text{CDCl}_3$ .

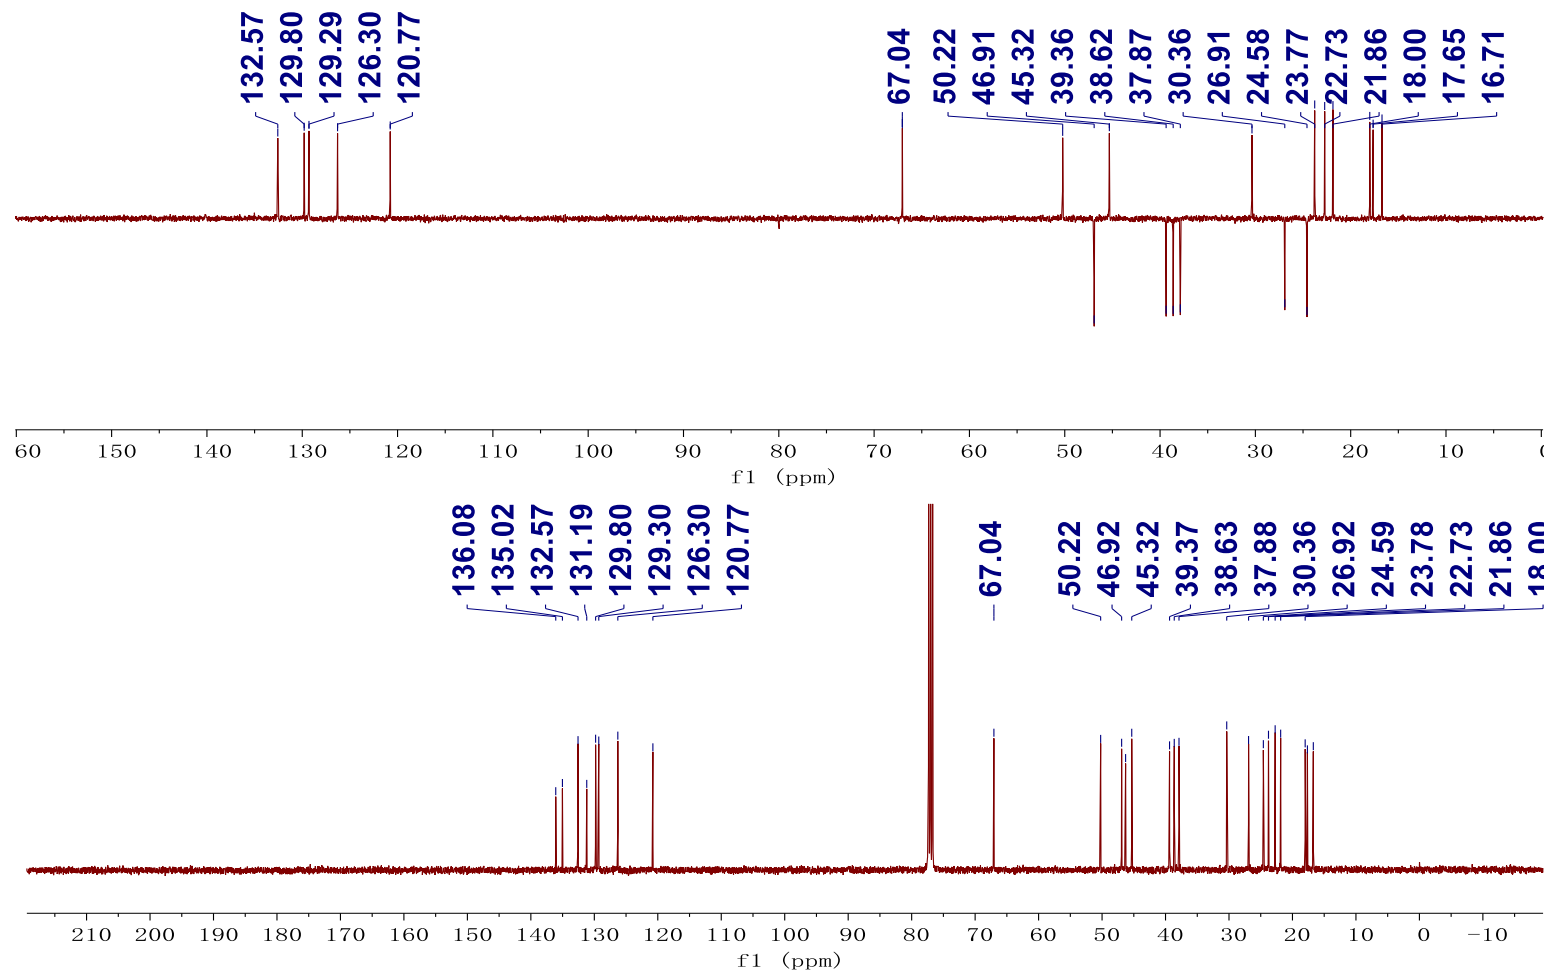

Figure S27. HSQC spectrum of Penisentenol (2) in CDCl<sub>3</sub>.

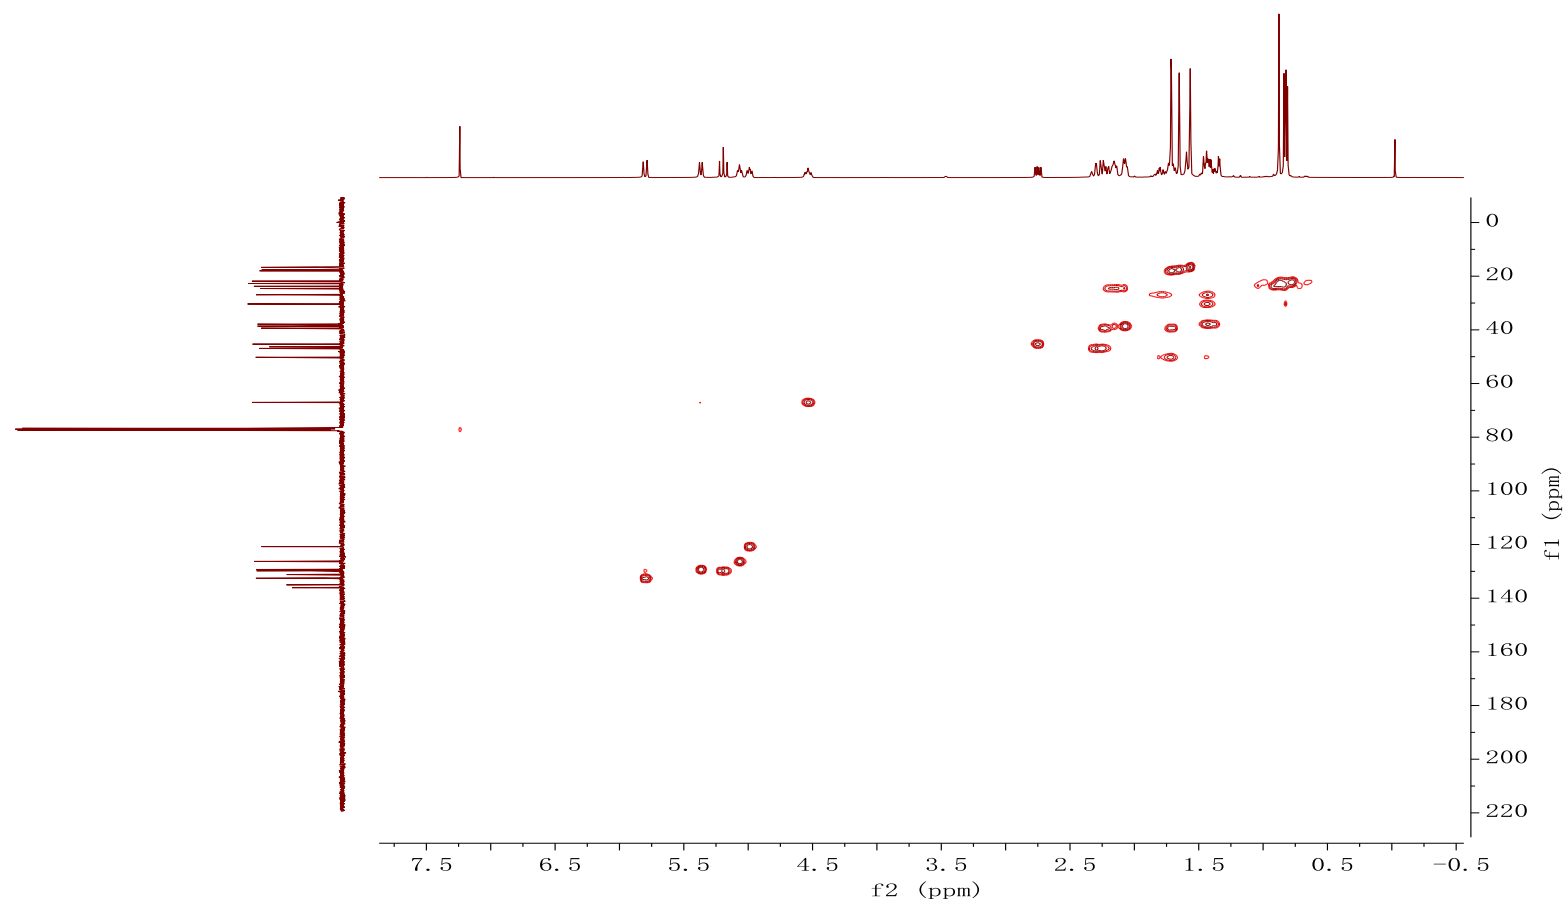

Figure S28. HMBC spectrum of Penisentenol (2) in CDCl<sub>3</sub>.

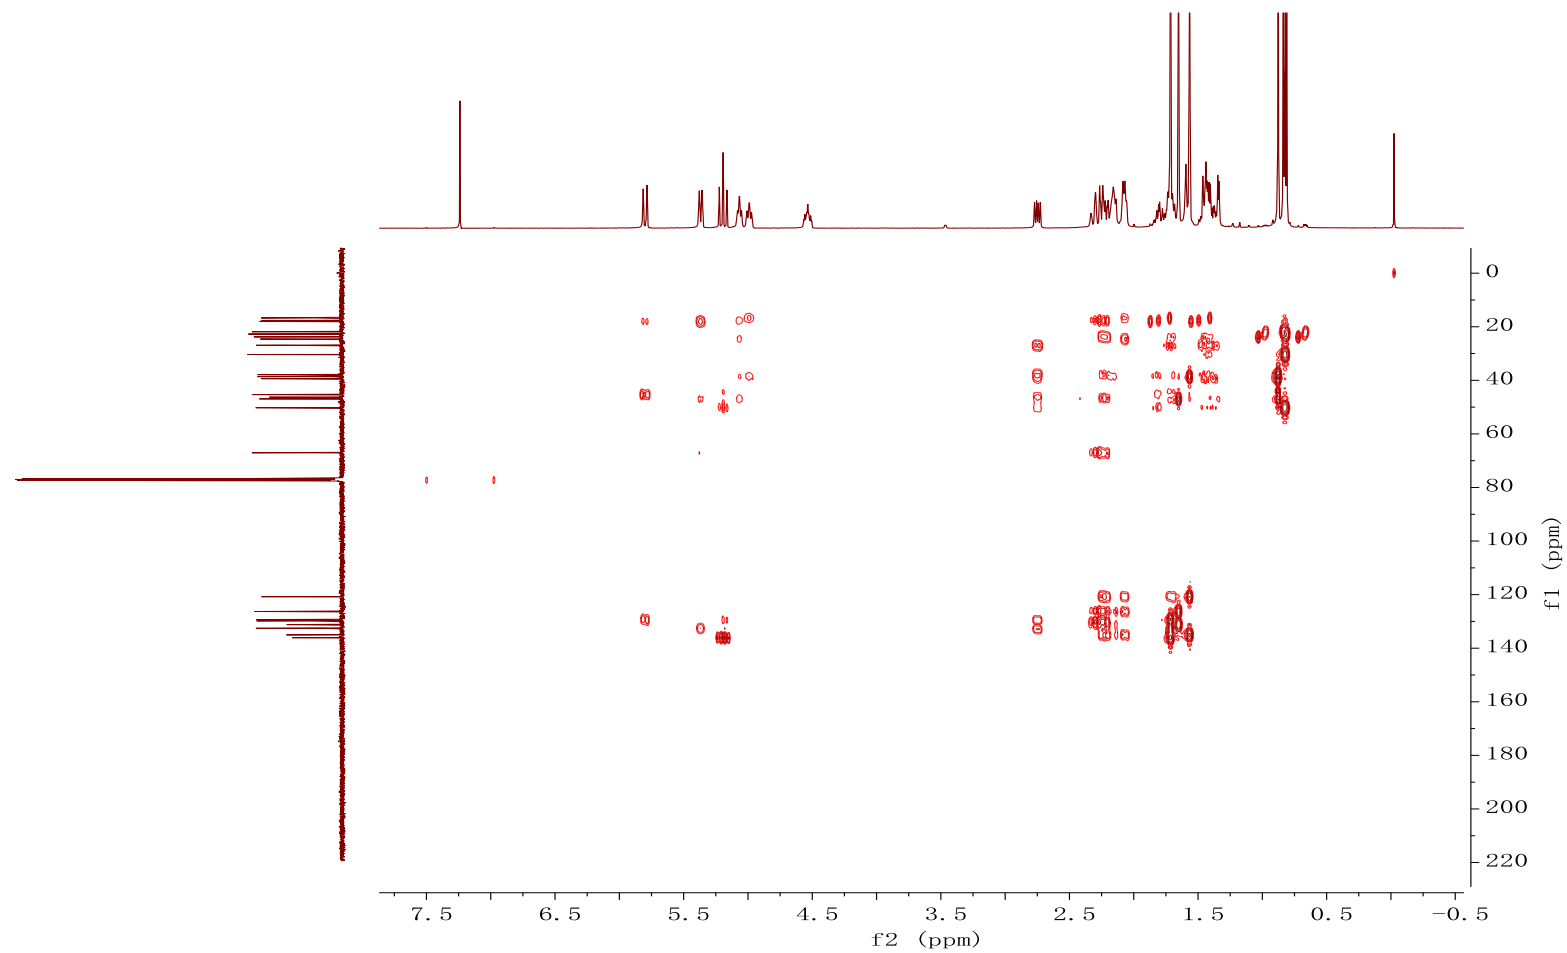



Figure S29.  $^1\text{H}$ - $^1\text{H}$  COSY spectrum of Penisentenol (2) in  $\text{CDCl}_3$ .

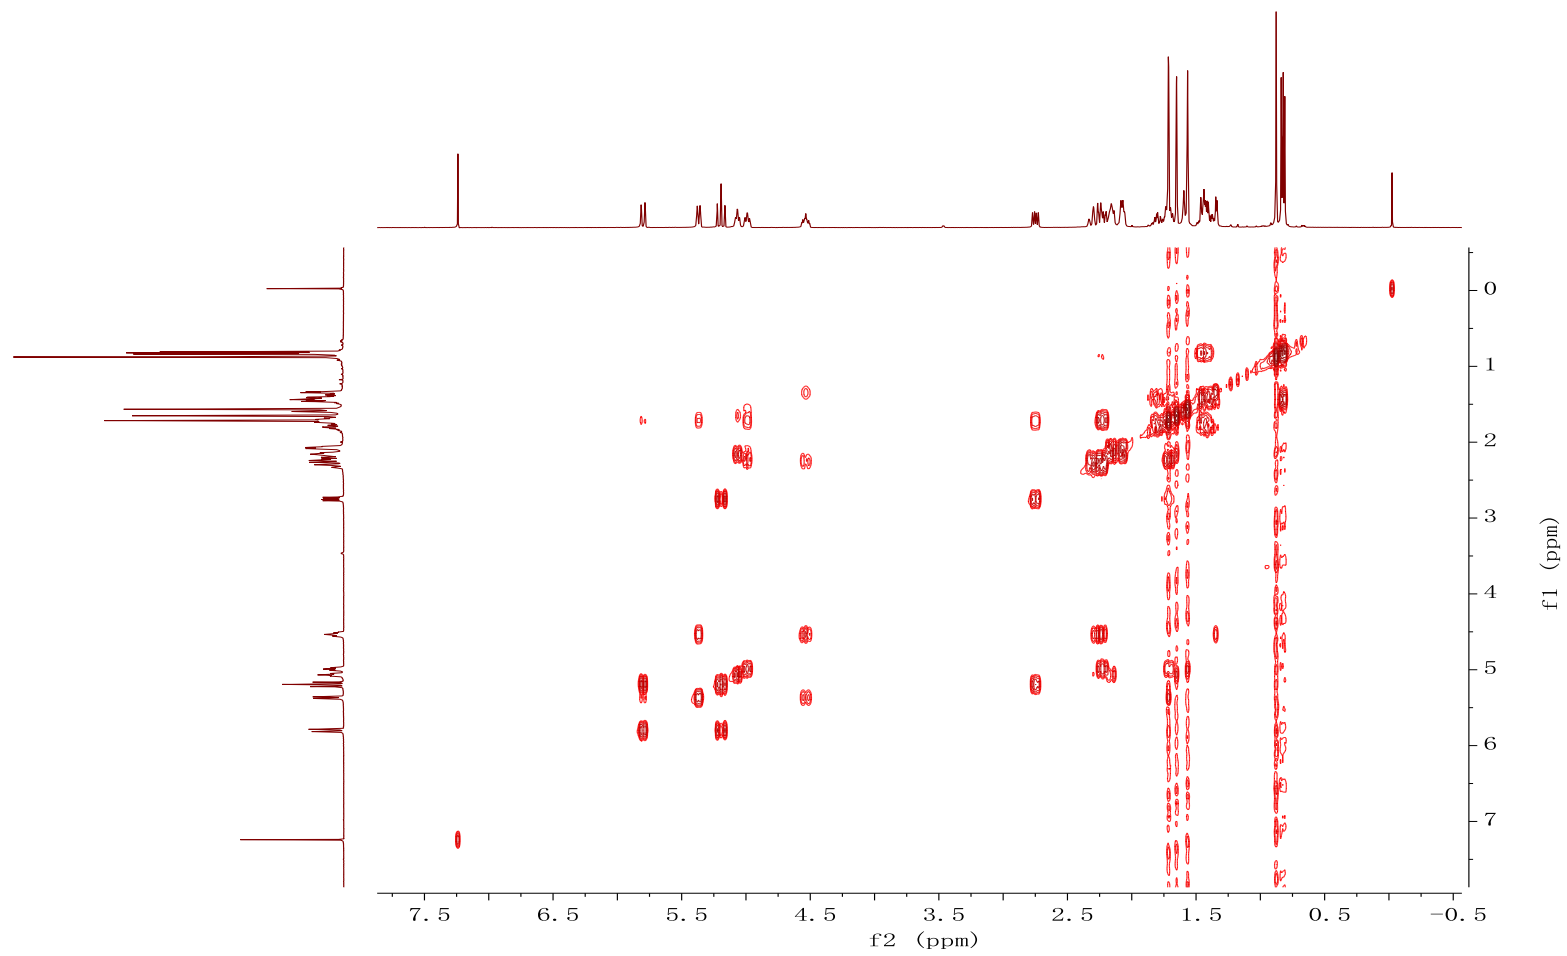

Figure S30. NOESY spectrum of Penisentenol (2) in CDCl<sub>3</sub>.

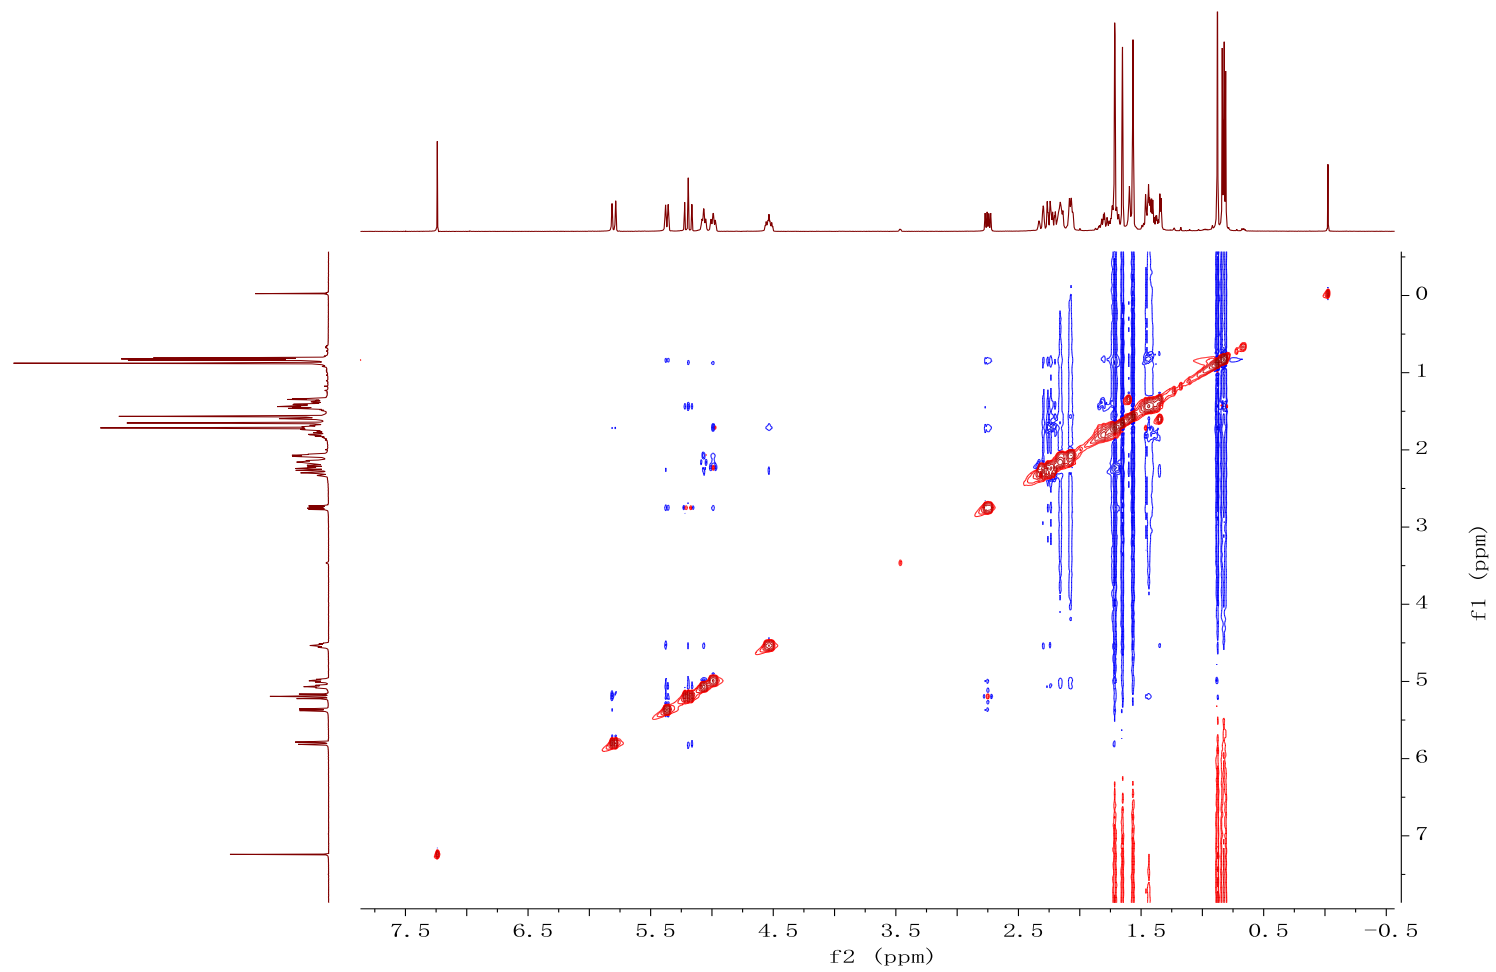

Figure S31.  $^1\text{H}$  NMR spectrum of Penisentone (3) in  $\text{CDCl}_3$ .

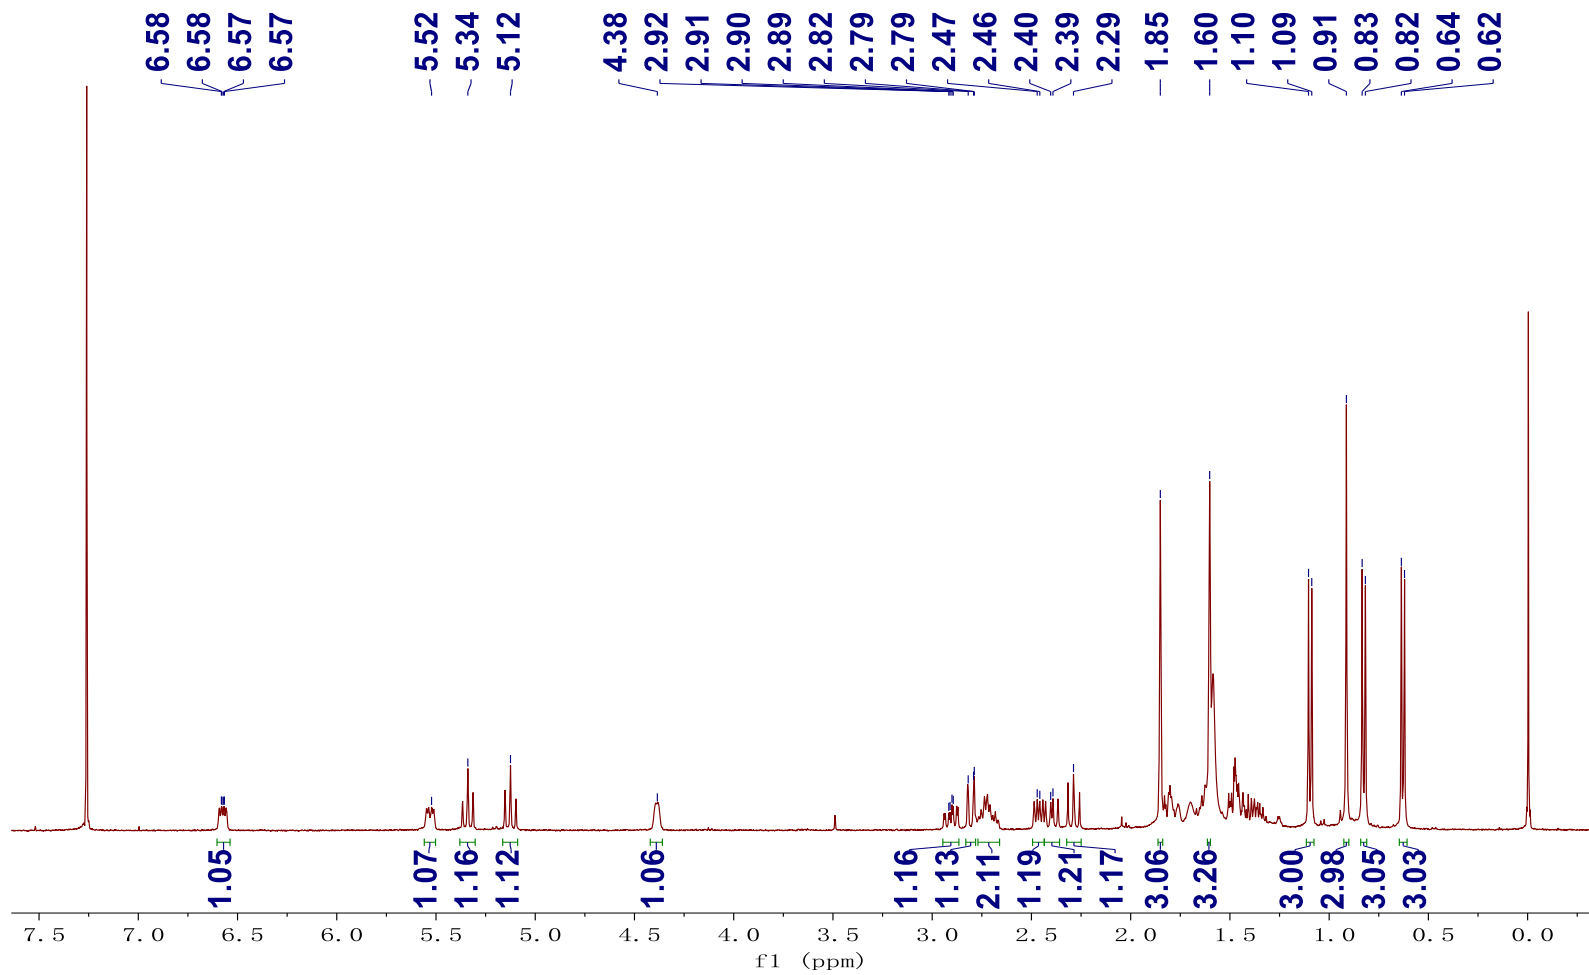

Figure S32.  $^{13}\text{C}$  NMR and DEPT spectra of Penisentone (3) in  $\text{CDCl}_3$ .

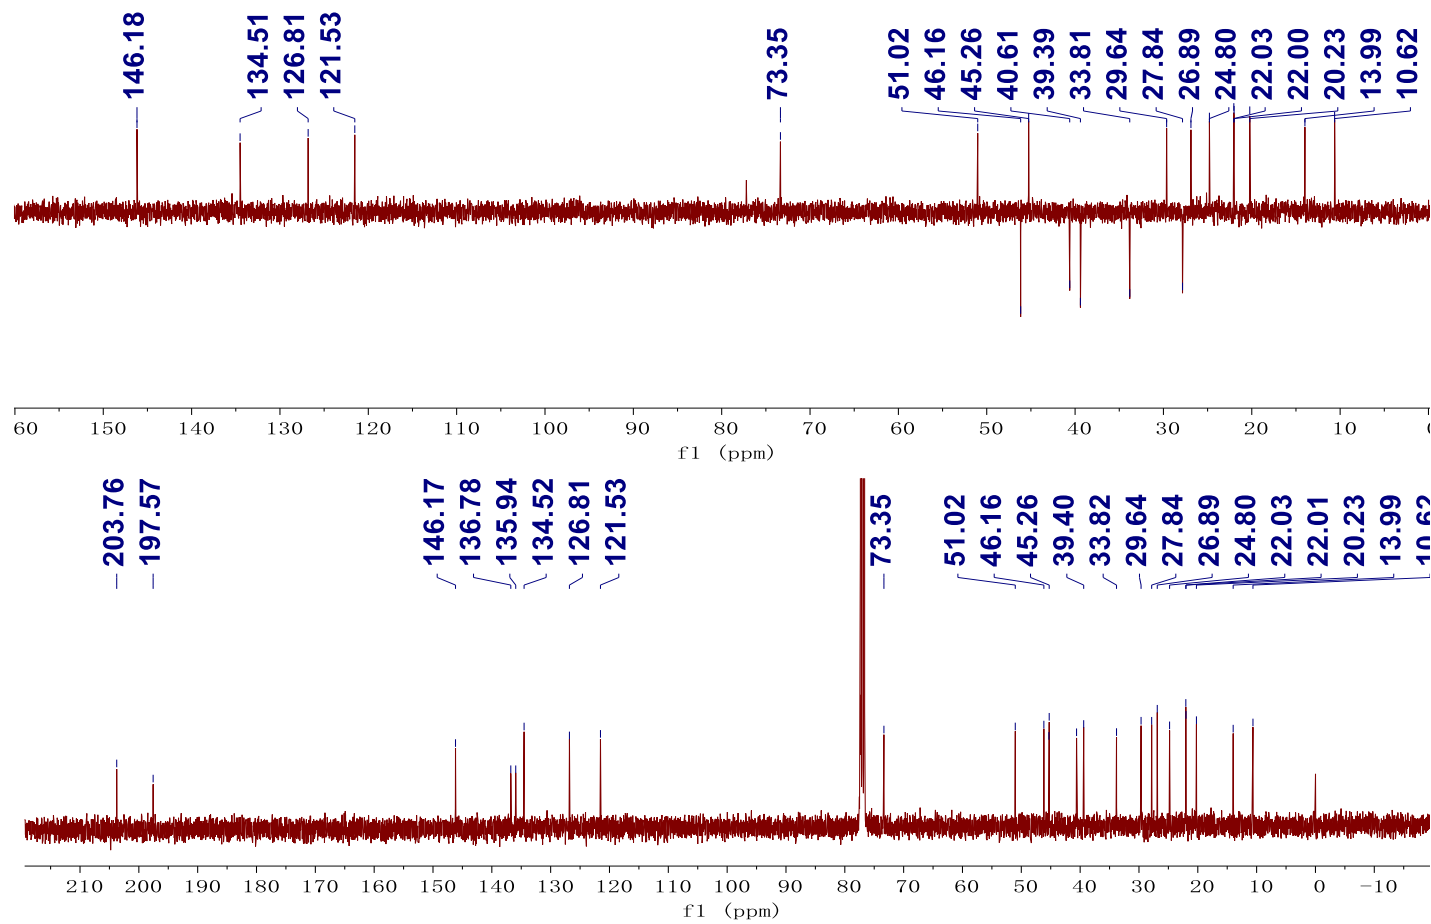

Figure S33. HSQC spectrum of Penisentone (3) in CDCl<sub>3</sub>.

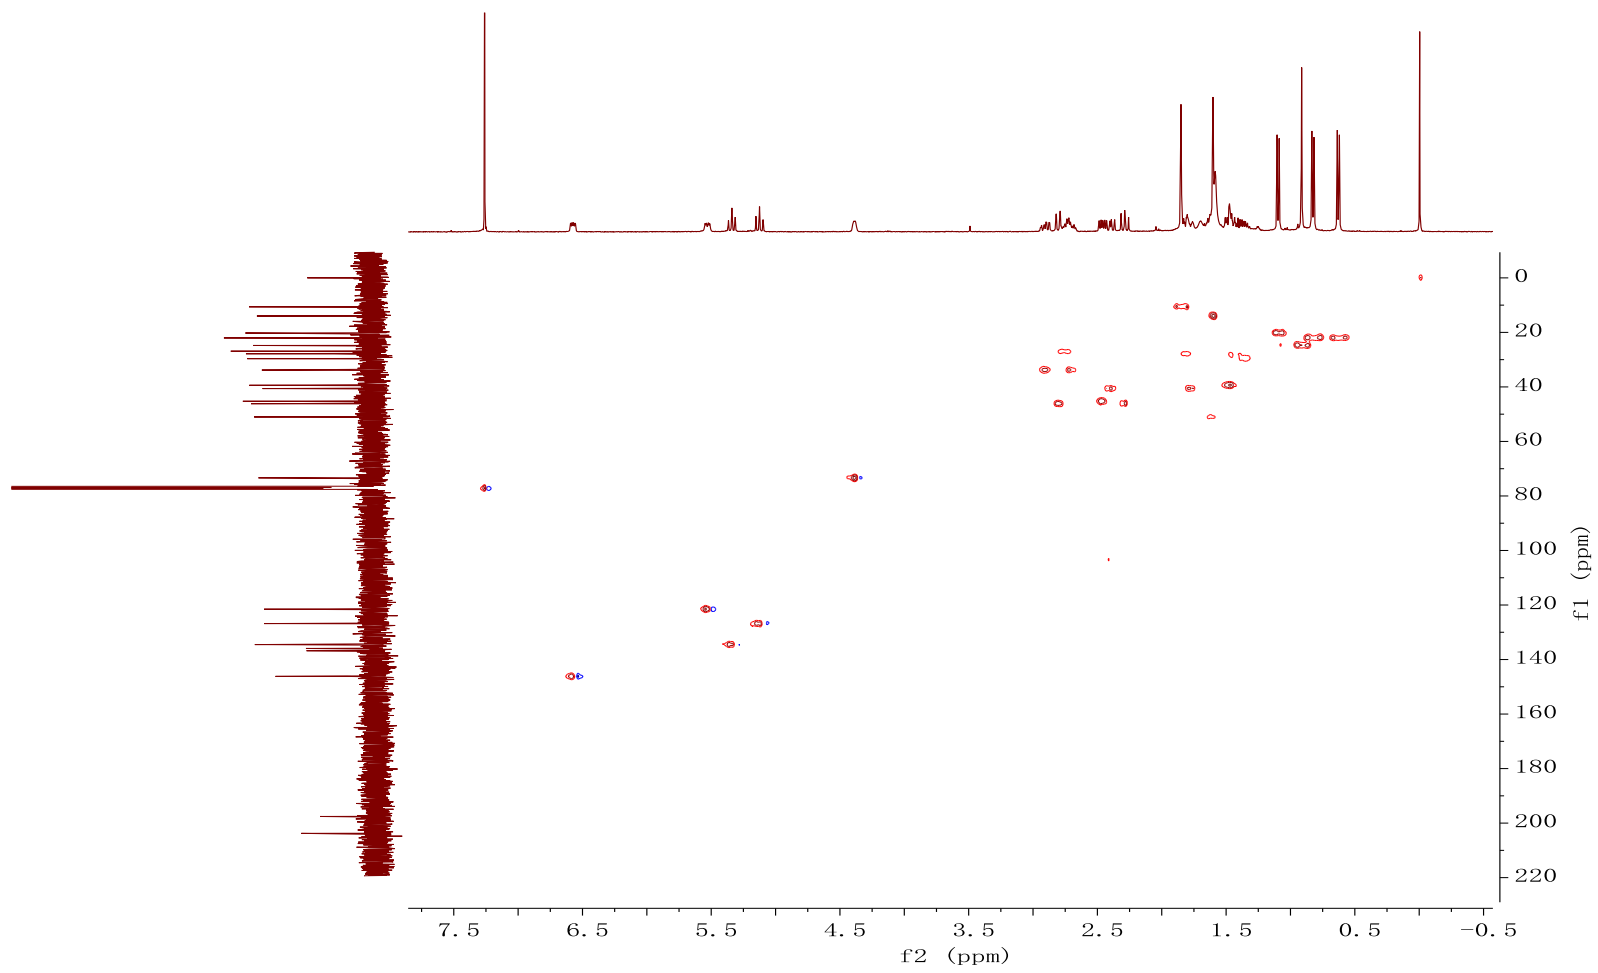

Figure S34. HMBC spectrum of Penisentone (3) in CDCl<sub>3</sub>.

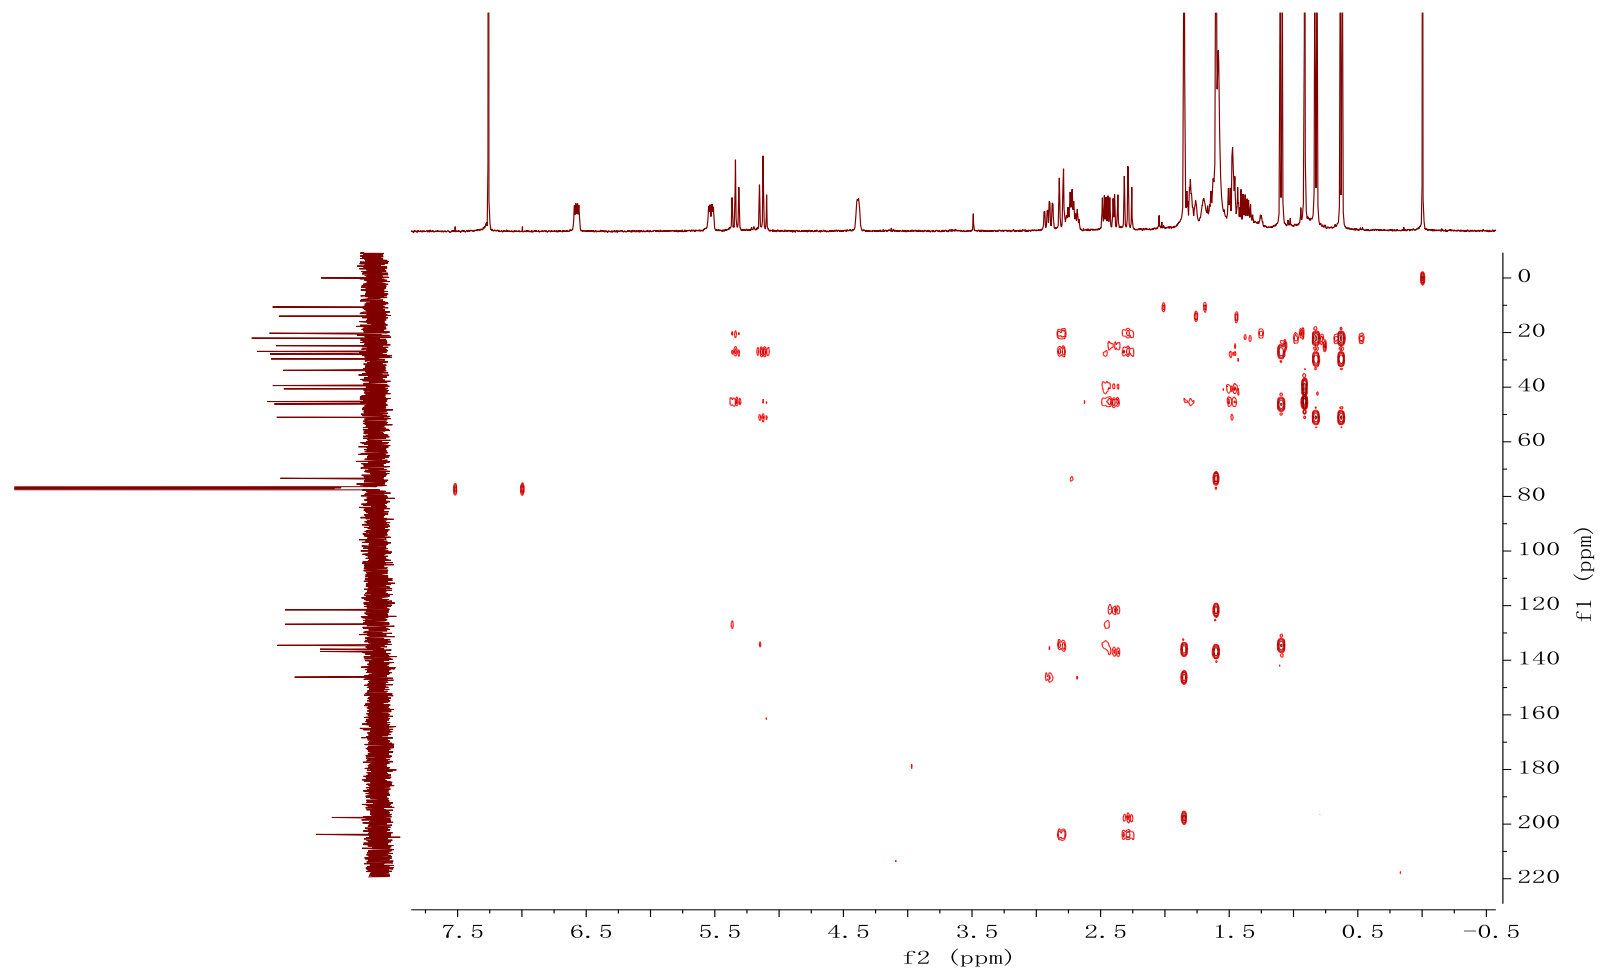

Figure S35.  $^1\text{H}$ - $^1\text{H}$  COSY spectrum of Penisentone (3) in  $\text{CDCl}_3$ .

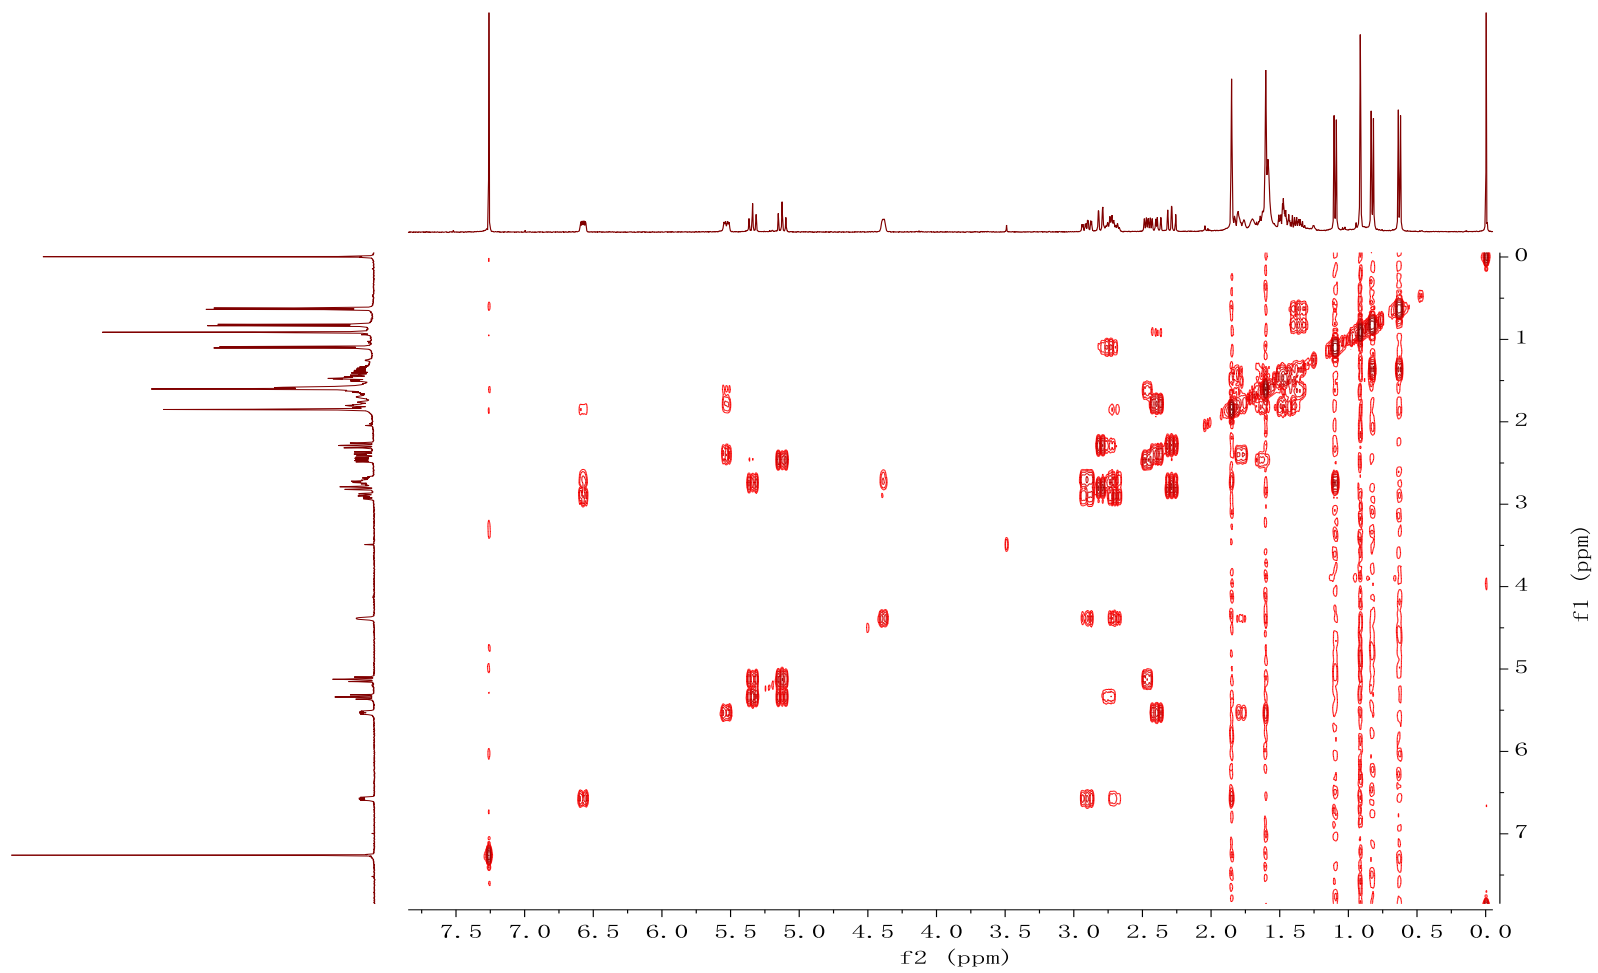

Figure S36. NOESY spectrum of Penisentone (3) in CDCl<sub>3</sub>.

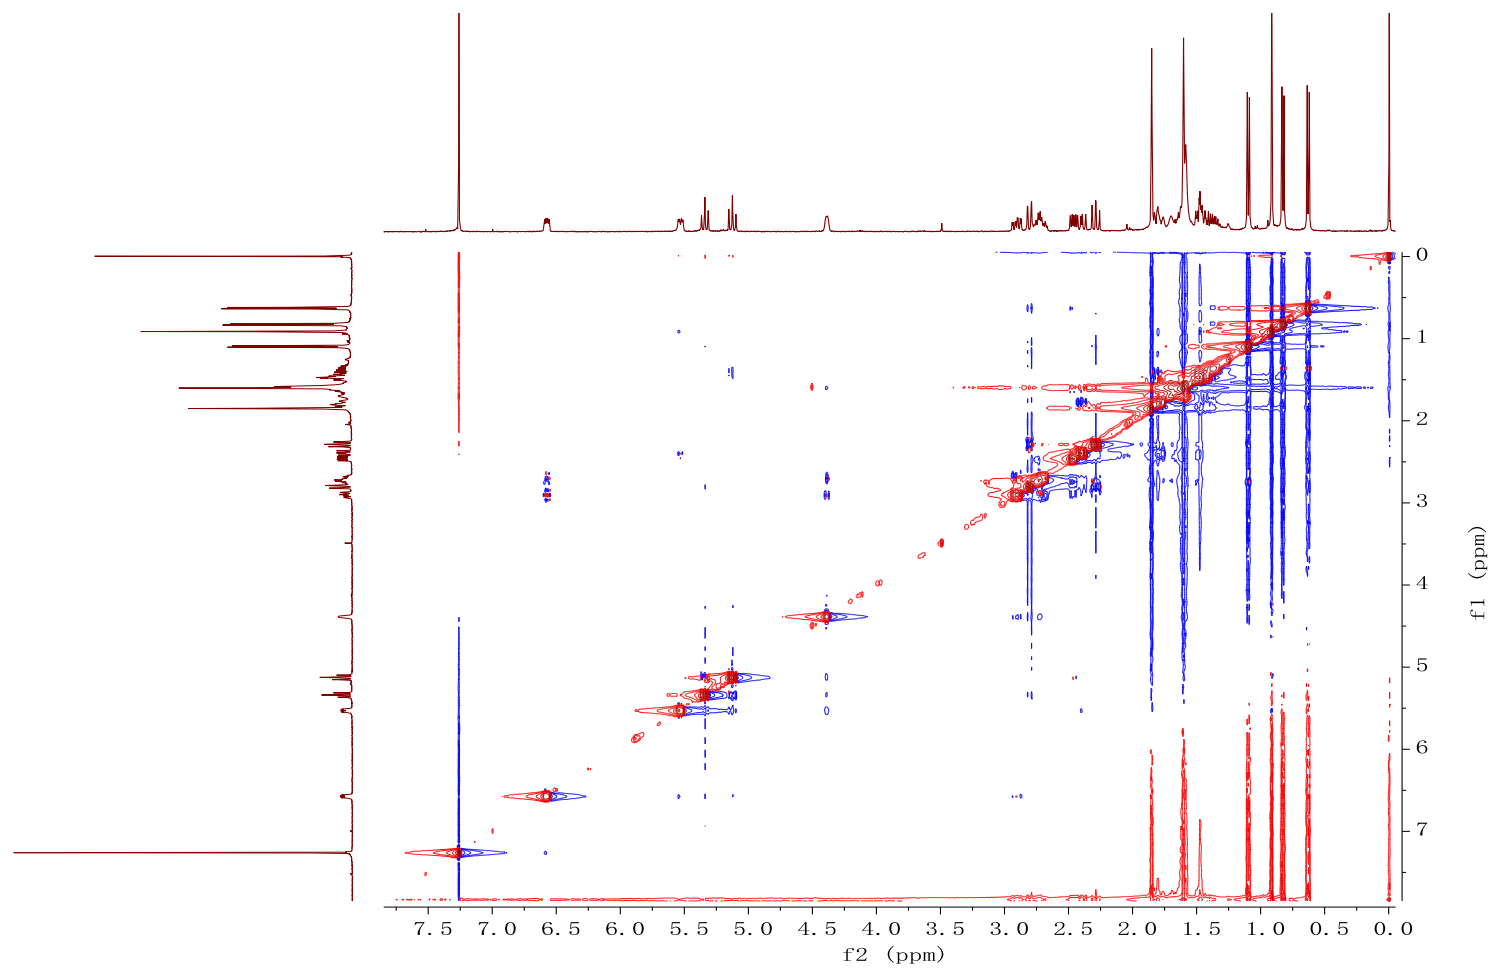



Figure S37.  $^1\text{H}$  NMR spectrum of Derivepenisentene (4) in  $\text{CDCl}_3$ .

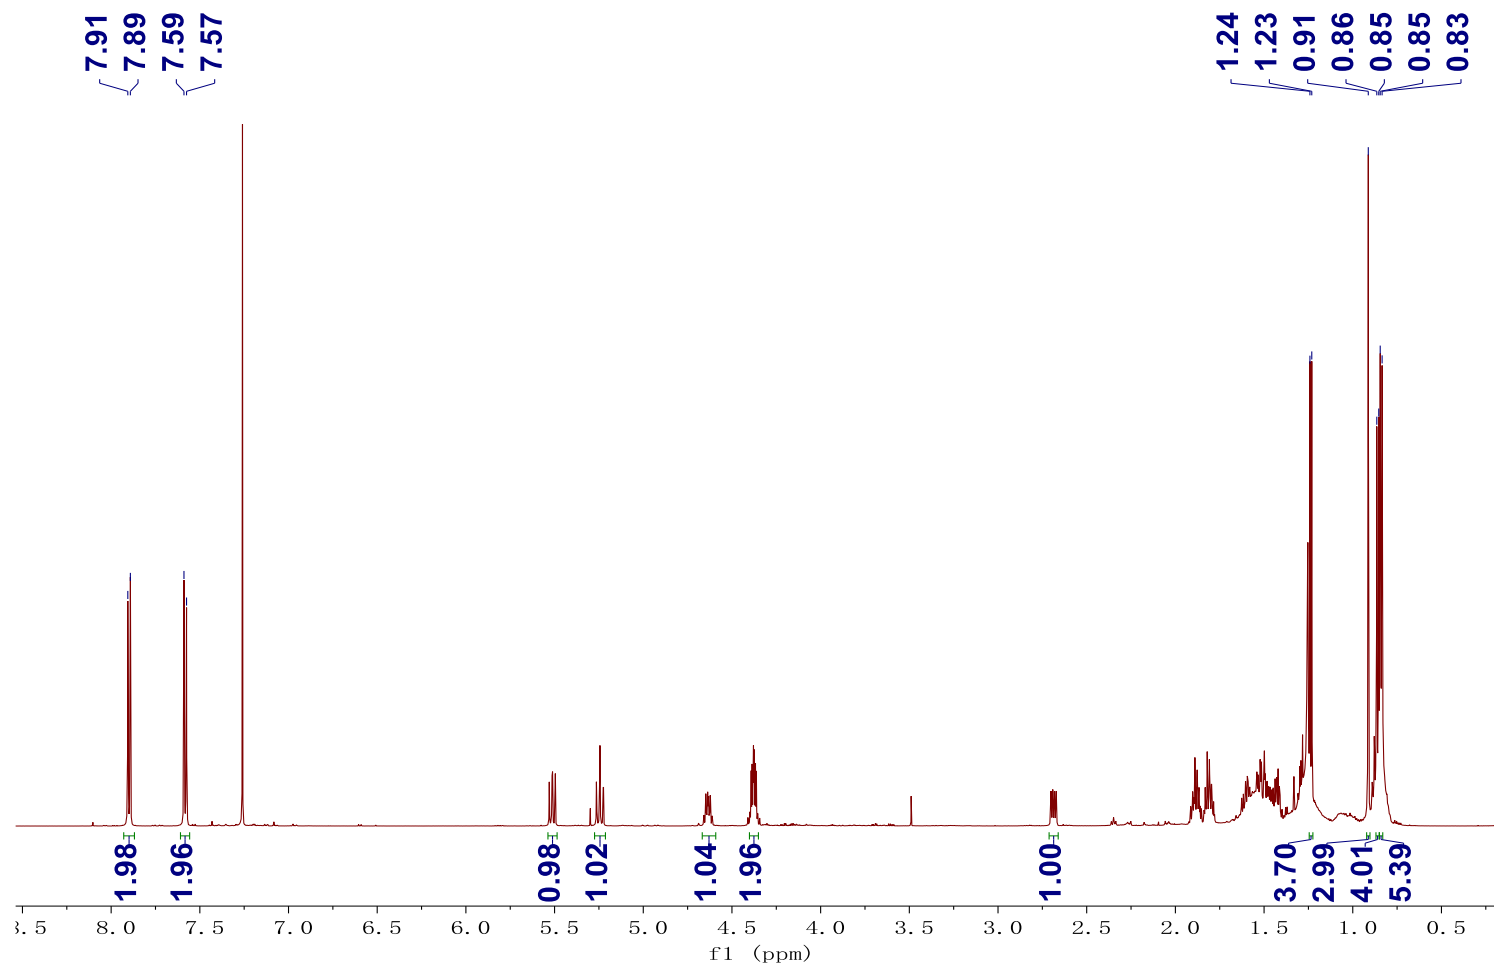

Figure S38.  $^{13}\text{C}$  NMR and DEPT spectra of Derivepenisentene (4) in  $\text{CDCl}_3$ .

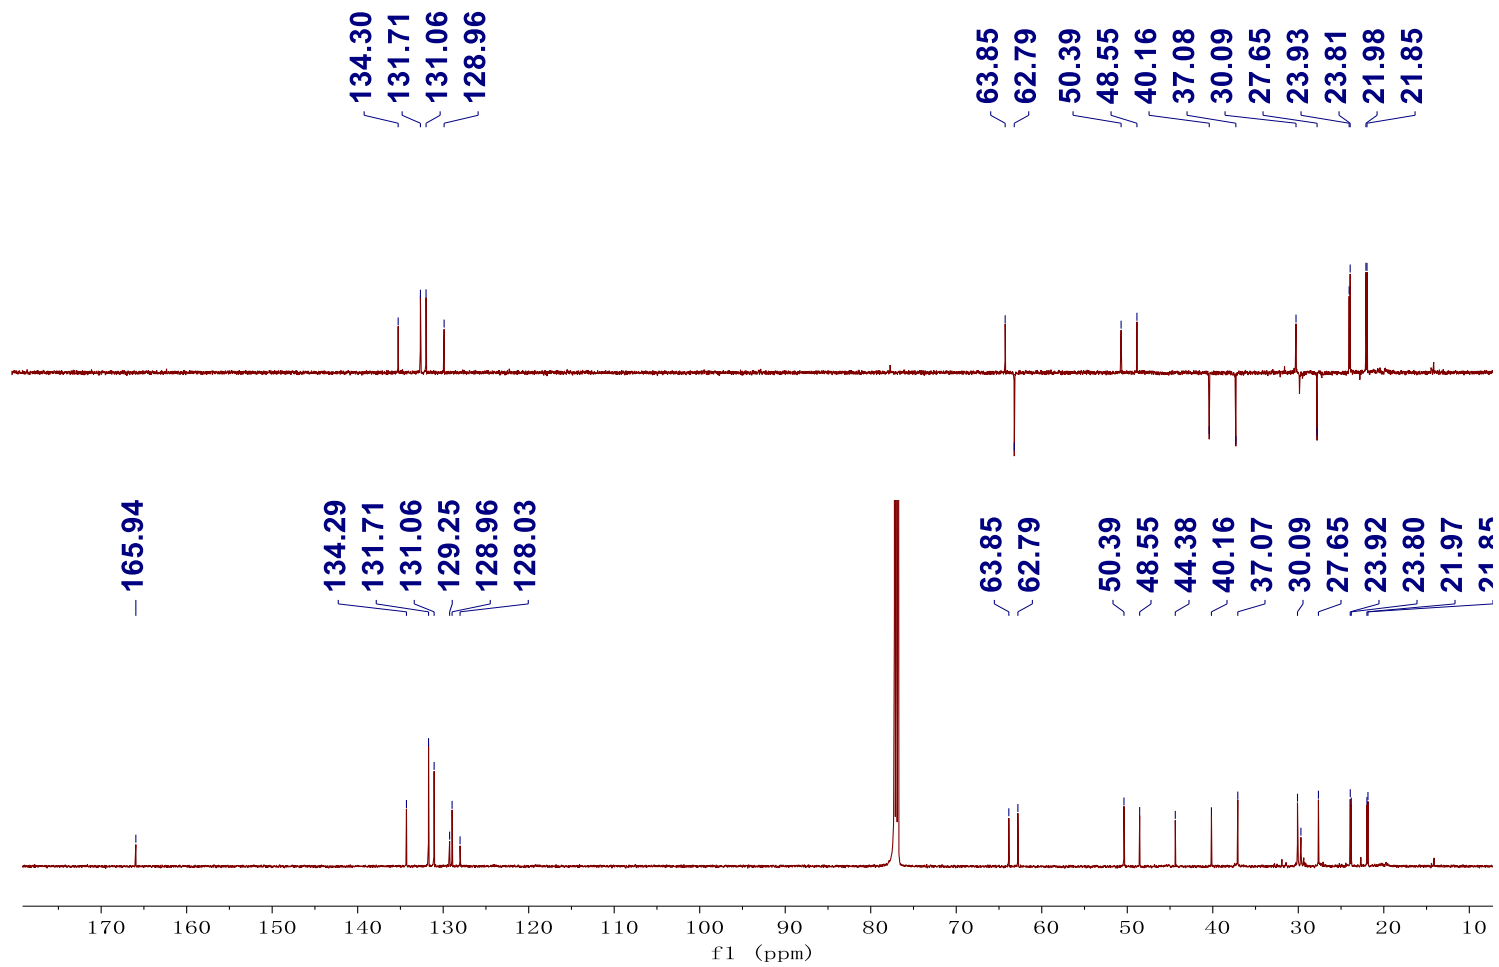

Figure S39. HSQC spectrum of Derivepenisentene (4) in CDCl<sub>3</sub>.

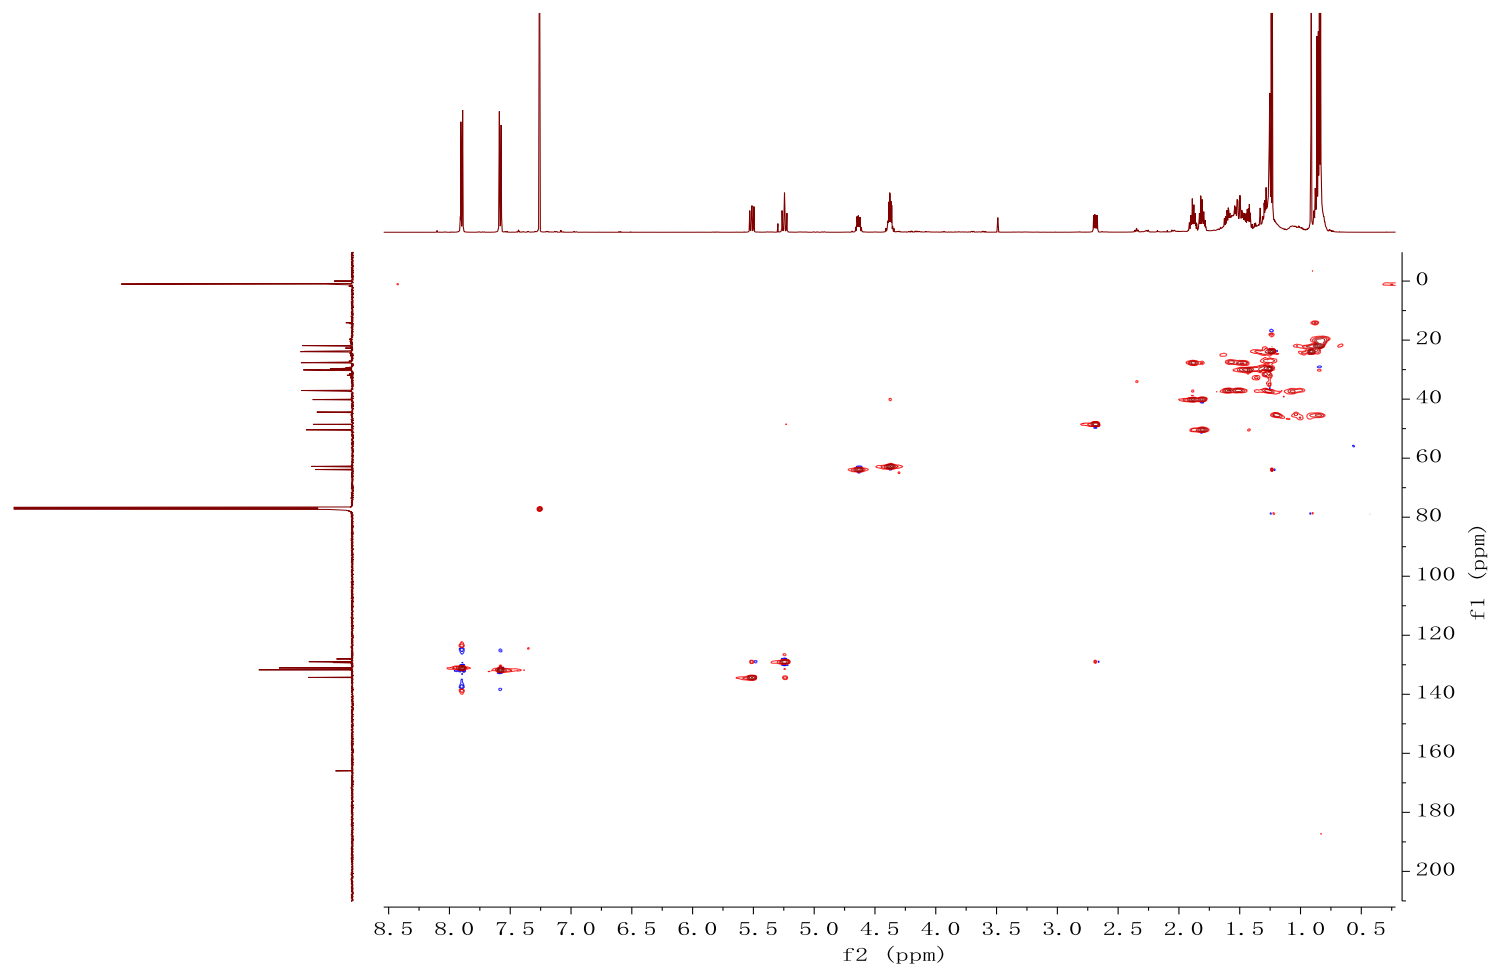

Figure S40. HMBC spectrum of Derivepenisentene (4) in CDCl<sub>3</sub>.

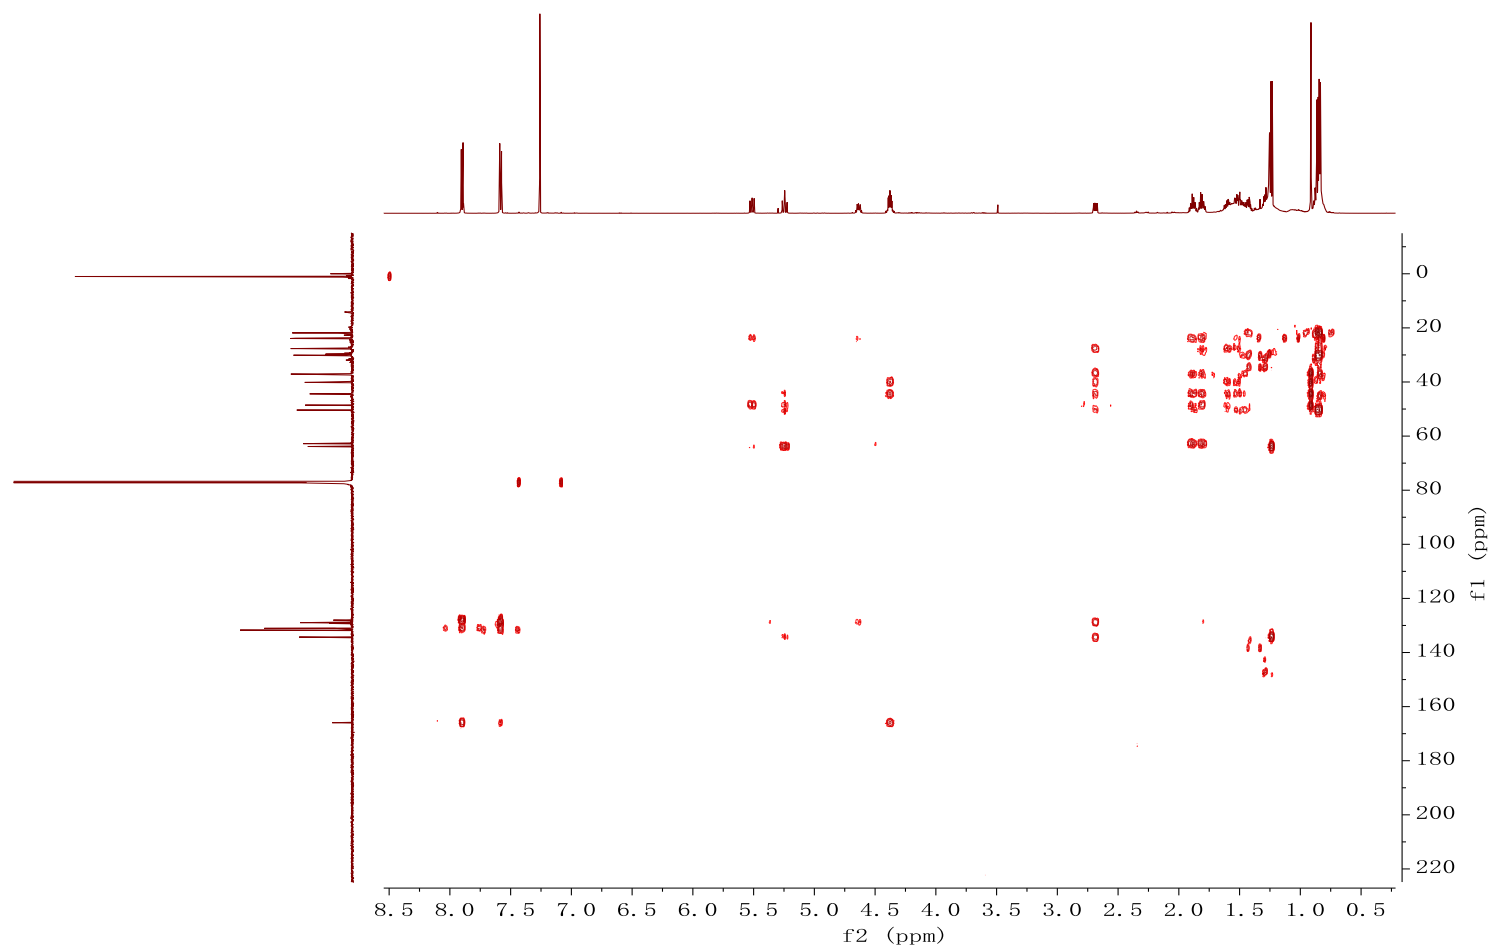

Figure S41.  $^1\text{H}$ - $^1\text{H}$  COSY spectrum of Derivepenisentene (4) in  $\text{CDCl}_3$ .

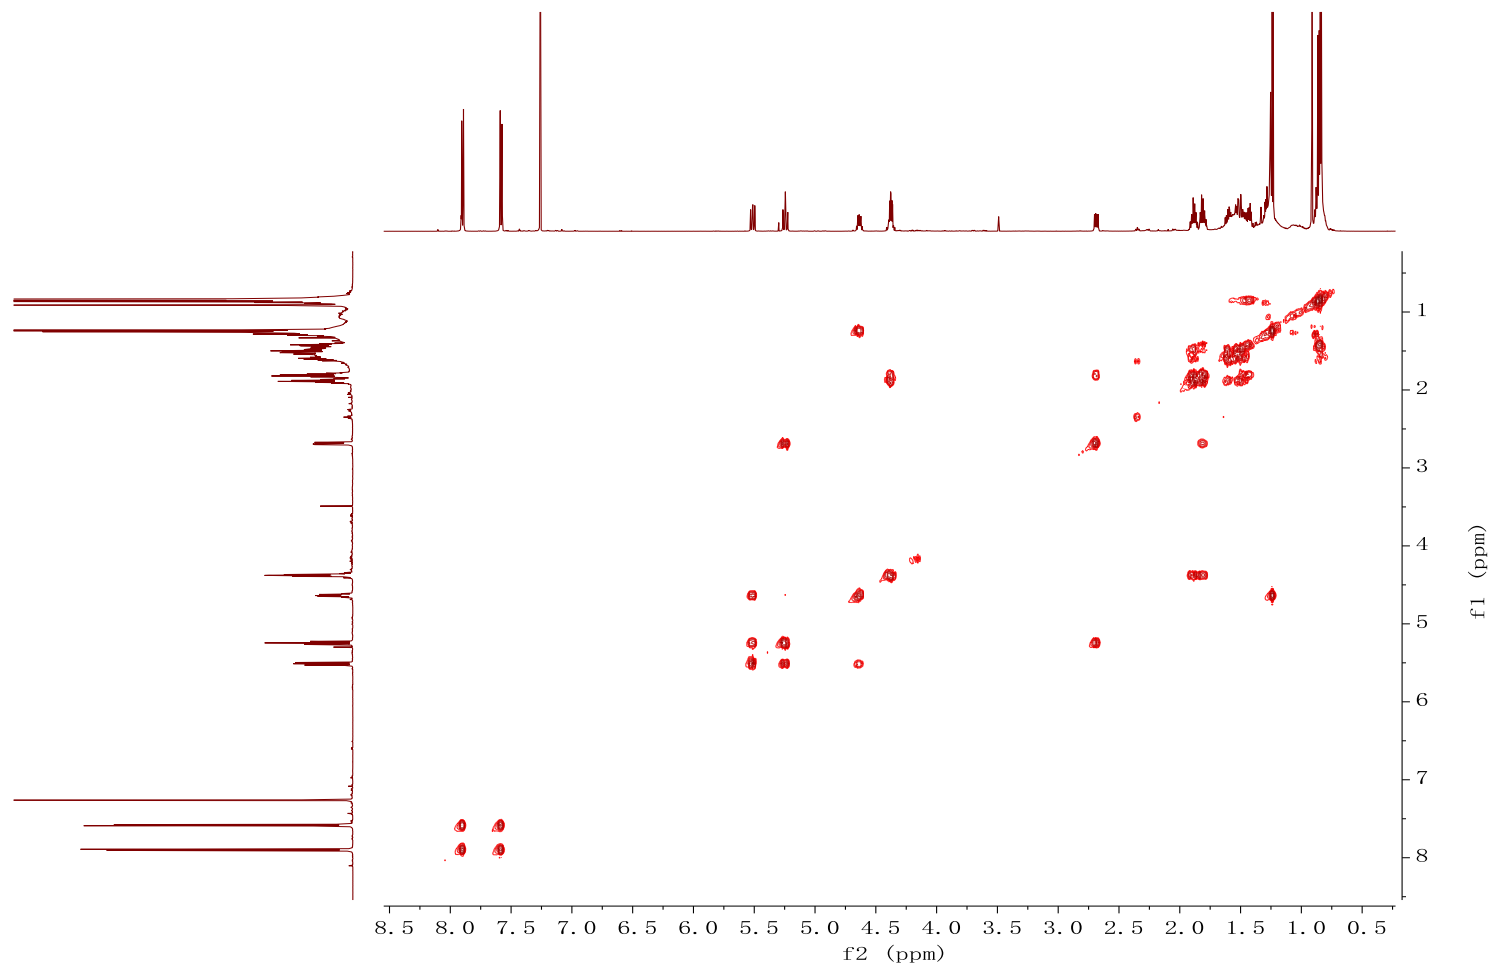

Figure S42. NOESY spectrum of Derivepenisentene (4) in CDCl<sub>3</sub>.

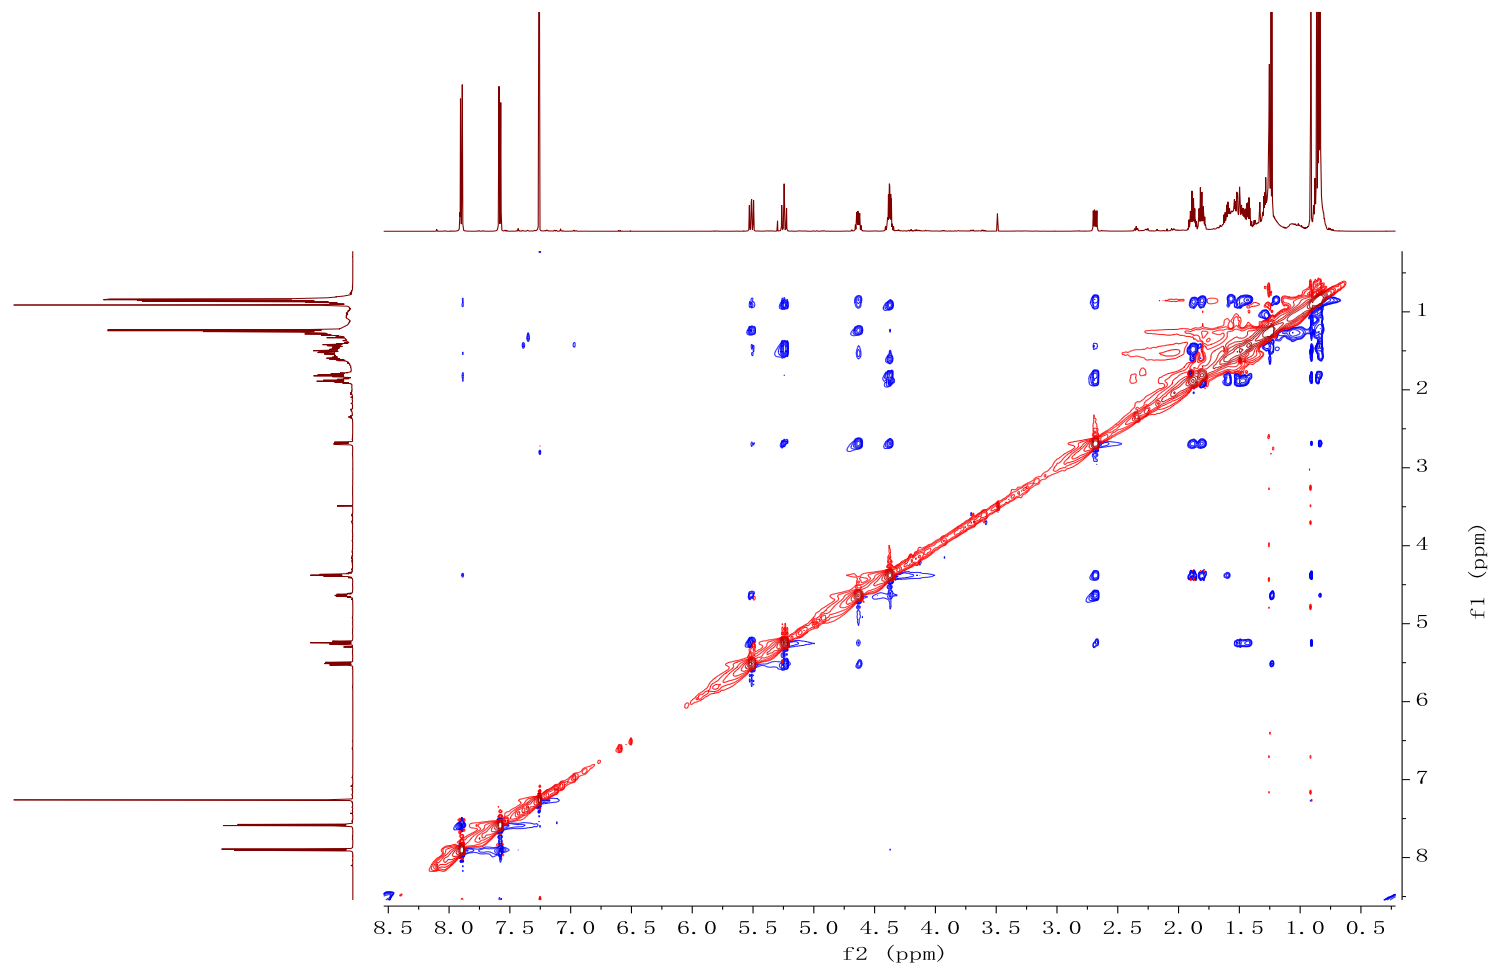

Figure S43. Experimental ECD and UV spectra of 1–3.

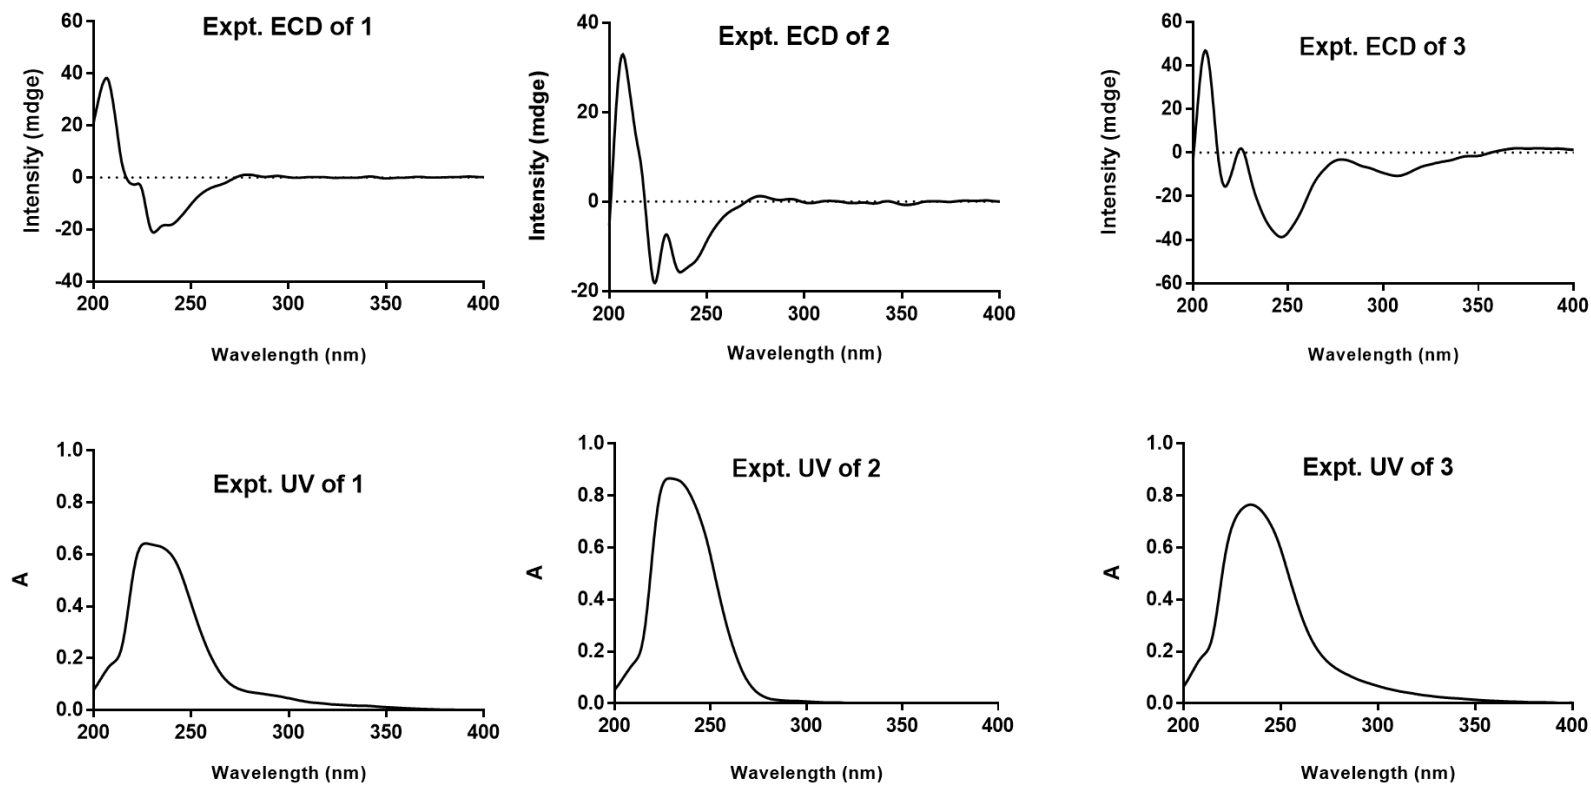

Figure S44. IR spectrum of 1.

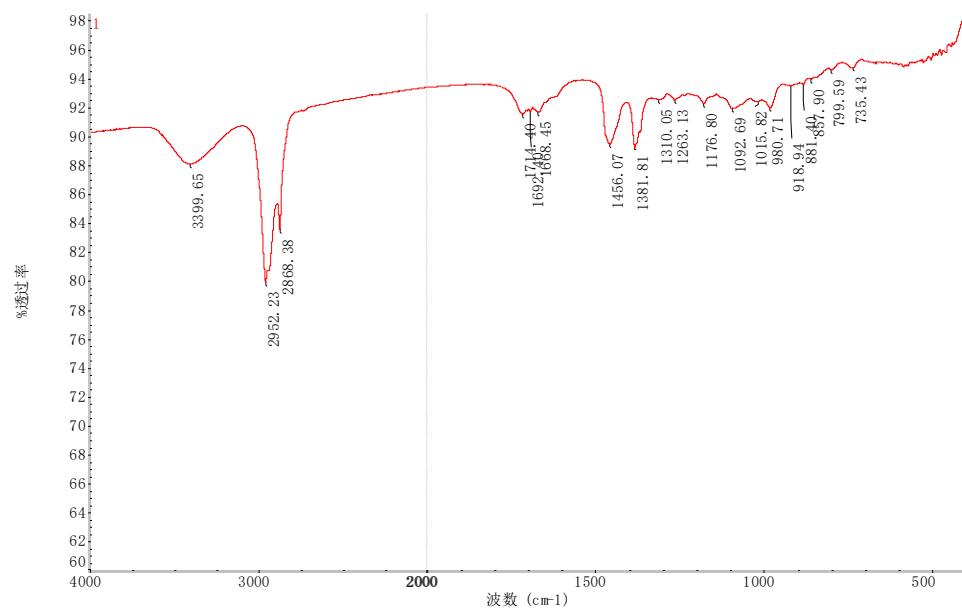

Supplement: d2qo00983h1.pdf [file d2qo00983h1.pdf]
